# Supplementary material for: Hydrogen bond-promoted regio- and stereoselective synthesis of isoindoline derivatives through Pd-catalyzed isocyanide insertion reaction involving aziridines
Source: Royal Society of Chemistry journal article supplement (doi:10.1039/d3qo02079g), 2024-01-01
Supplement: d3qo02079g1.pdf [file d3qo02079g1.pdf]

## Supporting Information

### Hydrogen Bond Promoted Regio- and Stereoselective Synthesis of Isoindoline Derivatives through the Pd-Catalyzed Isocyanide Insertion Reaction Involving Aziridines

Shuang Zheng,<sup>a†</sup> Hao-Jie Fan,<sup>a†</sup> Shan-Shan Liu,<sup>a,b</sup> Yang Xu,<sup>a</sup> Zhi-Wen Zhao,<sup>a</sup> Han-Han Kong,<sup>b</sup> Ping He,<sup>\*a,c</sup> Long Wang<sup>\*b</sup> and Zhi-Lin Ren<sup>\*a,b,c</sup>

<sup>a</sup> College of Chemical Engineering, Hubei University of Arts and Science, Xiangyang, Hubei Province, 441053, P. R. of China.

<sup>b</sup> Key laboratory of inorganic nonmetallic crystalline and energy conversion materials, College of Materials and Chemical Engineering, China Three Gorges University, Yichang, Hubei Province, 443002, P. R. of China.

<sup>c</sup> Hubei Longzhong Laboratory, Xiangyang, 441000, Hubei, China.

*E-mail: renzhilin@hbuas.edu.cn*

## Contents

|          |                                                                |                |
|----------|----------------------------------------------------------------|----------------|
| <b>1</b> | <b>General Information</b>                                     | <b>S2-3</b>    |
| <b>2</b> | <b>General Procedure for the Preparation of 3, 4 and 6</b>     | <b>S4-S5</b>   |
| <b>3</b> | <b>X-ray Crystallography Data of 6a</b>                        | <b>S5-S13</b>  |
| <b>4</b> | <b>Characterization Datas</b>                                  | <b>S13-S20</b> |
| <b>5</b> | <b>Copies of <sup>1</sup>H and <sup>13</sup>C NMR Spectrum</b> | <b>S20-S49</b> |
| <b>6</b> | <b>Copies of 2D <sup>1</sup>H NMR Spectrum of 4b</b>           | <b>S50</b>     |

## 1. General Information

Unless otherwise noted, all solvents and reagents were purchased from commercial suppliers without further purification. Oil bath was used for all required reactions with magnetic stirring. Column chromatography purifications were performed under “flash” conditions using 200-300 mesh silica gel. Analytical TLC was carried out on silica gel 60 F254 plates which were visualized by exposure to ultraviolet light. Melting points were determined with an X-4 model apparatus. Crystal was tested on a Bruker D8 Quest diffractometer. HRMS was measured on an Waters Xevo G2-XS ToF spectrometer. NMR spectra were recorded on a Bruker 400 spectrometer calibrated to  $\text{CDCl}_3$  using tetramethylsilane (TMS) as internal standards.  $^1\text{H}$  NMR spectral data are reported in terms of chemical shift ( $\delta$ , ppm), multiplicity (s = single, d = doublet, t = triplet, q = quartet, m = multiplet), coupling constant (Hz), and integration.  $^{13}\text{C}$  NMR spectral data are reported in terms of chemical shift.

All calculations in this work were performed using Gaussian 16 program package<sup>[1]</sup>. Full geometry optimizations were performed to locate all the stationary points, using the M06-2x method<sup>[2]</sup> with the def2tzvp<sup>[3-4]</sup>, namely M06-2x/def2tzvp, as well as the frequency calculation all in M06-2x/def2tzvp level. Dispersion corrections were computed with Grimme's D3(BJ) method in optimization<sup>[5]</sup>. Harmonic vibrational frequency was performed at the same level to guarantee that there is no imaginary frequency in the molecules, i.e. they locate on the minima of potential energy surface. Convergence parameters of the default threshold were retained (maximum force within  $4.5 \times 10^{-4}$  Hartrees/Bohr and root mean square (RMS) force within  $3.0 \times 10^{-4}$  Hartrees/Radian) to obtain the optimized structure. The optimal structure was identified given that all calculations for structural optimization were successfully converged within the convergence threshold of no imaginary frequency, during the process of vibration analysis.

### References:

- [1] M.J. Frisch, G.W. Trucks, H.B. Schlegel, G.E. Scuseria, M.A. Robb, J.R., G. Scalmani, V. Barone, B. Mennucci, G.A. Petersson, H. Nakatsuji, M. Caricato, X.

Li, H.P. Hratchian, A.F. Izmaylov, J. Bloino, G. Zheng, J.L. Sonnenberg, M. Hada, M. Ehara, K. Toyota, R. Fukuda, J. Hasegawa, M. Ishida, T. Nakajima, Y. Honda, O. Kitao, H. Nakai, T. Vreven, J.A. Montgomery, J.J.E. Peralta, F. Ogliaro, M. Bearpark, J.J. Heyd, E. Brothers, K.N. Kudin, V.N. Taroverov, T. Keith, R. Kobayashi, J. Normand, K. Raghavachari, A. Rendell, J.C. Burant, S.S. Iyengar, J. Tomasi, M. Cossi, N. Rega, J.M. Millam, M. Klene, J.E. Knox, J.B. Cross, V. Bakken, C. Adamo, J. Jaramillo, R. Gomperts, R.E. Stratmann, O. Yazyev, A. J. Austin, R. Cammi, C. Pomelli, J. W. Ochterski, R.L. Martin, K. Morokuma, V.G. Zakrzewski, G.A. Voth, P. Salvador, J.J. Dannenberg, S. Dapprich, A.D. Daniels, O. Farkas, J.B. Foresman, J.V. Ortiz, J. Cioslowski, D.J. Fox, Gaussian 16 (Revision D.01), I. Gaussian, Wallingford, CT, 2013.

- [2] Krishnan, R.; Binkley, J. S.; Seeger, R.; Pople, J. A., Self-consistent molecular orbital methods. XX. A basis set for correlated wave functions. *J. Chem. Phys.* **1980**, *72* (1), 650-654.
- [3] Weigend, F.; Ahlrichs, R., Balanced basis sets of split valence, triple zeta valence and quadruple zeta valence quality for H to Rn: Design and assessment of accuracy. *Phys Chem Chem Phys* **2005**, *7* (18), 3297-305.
- [4] Xu S., He T., Li J., Huang Z., & Hu C., Enantioselective synthesis of D-lactic acid via chemocatalysis using MgO: Experimental and molecular-based rationalization of the triose's reactivity and preliminary insights with raw biomass. *Appl. Catal. B: Environ.* **2021**, 292:120145.
- [5] Grimme, S.; Antony, J.; Ehrlich, S.; Krieg, H., A consistent and accurate *ab initio* parametrization of density functional dispersion correction (DFT-D) for the 94 elements H-Pu. *J. Chem. Phys.* **2010**, *132* (15), 154104.

## 2. General Procedure for the Preparation of 3 and 4.

A mixture of benzaldehydes **1** (4 mmol) and ketones **2** (4 mmol) were subjected to a solution of 10% NaOH (1 mL) in an ice-bath of ethanol (12 mL) for 4 hours (Scheme S1). The reactions yielded chalcones **3**.<sup>[6]</sup> NMM (223 mg, 2.2 mmol) was added dropwise over 1 min to a solution of DppONH<sub>2</sub> (513 mg, 2.2 mmol) in MeCN (20 mL) at rt under N<sub>2</sub>. The white mixture was allowed to stir for 30 min, then NaOH (160 mg, 4.0 mmol) and chalcones **3** (2.0 mmol) were added sequentially. The mixture was allowed to stir at rt for 10 h, then quenched by the addition of saturated NH<sub>4</sub>Cl solution (30 mL). After completion, the solvent was removed under reduced pressure and the residue was purified by flash chromatography on silica gel with ethylacetate/petroleum ether (1: 22-25) as the eluent to give products **4** in a yield of 70–85%.<sup>[7]</sup>

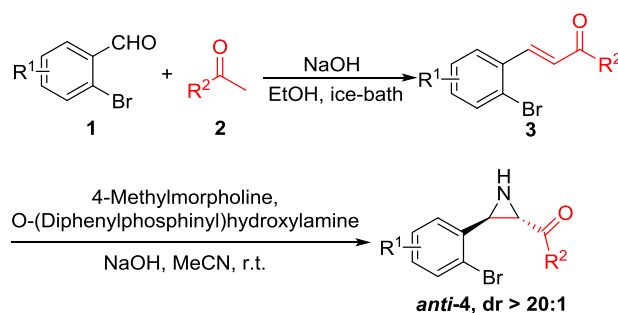

| Comp.     | R <sup>1</sup> | R <sup>2</sup>                                    | yield <sup>a</sup> (%) | Comp.     | R <sup>1</sup> | R <sup>2</sup>                    | yield (%) |
|-----------|----------------|---------------------------------------------------|------------------------|-----------|----------------|-----------------------------------|-----------|
| <b>4a</b> | H              | 4-ClC <sub>6</sub> H <sub>4</sub>                 | 80                     | <b>4g</b> | 5-F            | 4-ClC <sub>6</sub> H <sub>4</sub> | 77        |
| <b>4b</b> | H              | 2,4-Cl <sub>2</sub> C <sub>6</sub> H <sub>3</sub> | 77                     | <b>4h</b> | 5-Cl           | C <sub>6</sub> H <sub>5</sub>     | 75        |
| <b>4c</b> | H              | 4-FC <sub>6</sub> H <sub>4</sub>                  | 74                     | <b>4i</b> | 5-Cl           | 4-ClC <sub>6</sub> H <sub>4</sub> | 85        |
| <b>4d</b> | H              | C <sub>6</sub> H <sub>5</sub>                     | 78                     | <b>4j</b> | 4-F            | C <sub>6</sub> H <sub>5</sub>     | 79        |
| <b>4e</b> | H              | 4-CH <sub>3</sub> C <sub>6</sub> H <sub>4</sub>   | 70                     | <b>4k</b> | 4-Cl           | C <sub>6</sub> H <sub>5</sub>     | 80        |
| <b>4f</b> | 5-F            | C <sub>6</sub> H <sub>5</sub>                     | 76                     | <b>4l</b> | 4-Cl           | 4-ClC <sub>6</sub> H <sub>4</sub> | 82        |

<sup>a</sup> Yield of isolated product based on substrates **3**.

**Scheme S1** Preparation of substrates **4**.

## General Procedure for the Preparation of **6**.

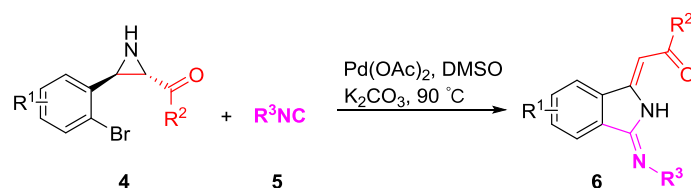

**Scheme S2** Preparation of products **6**.

In an oven-dried 10 mL pressure tube, a mixture of substrates **4** (0.5 mmol), isocyanides **5** (0.6 mmol, 1.2 equiv.),  $\text{K}_2\text{CO}_3$  (103.5 mg, 0.75 mmol, 1.5 equiv.) and  $\text{Pd(OAc)}_2$  (5.6 mg, 0.025 mmol, 0.05 equiv.) were dissolved in DMSO (4 mL) at 90 °C by oil bath for 8 h (Scheme S2). The reactions were monitored by TLC. After completion, the solvent was removed under reduced pressure and the residue was purified by flash chromatography on silica gel with ethylacetate/petroleum ether (1: 25-30) as the eluent to give products **6** in a yield of 62–81%.

### References:

- [6] (a) Xu, M.; Chen, A.; Ren, Z.; Qiu, J.; Zu, M.; Wang, Y.; He, P. *Synlett* **2021**, 32, 1874–1878. (b) Rao, Y.; Liu, M.; Wu, L.; Yin, G. *RSC Adv.* **2014**, 4, 64551–64558.
- [7] (a) Armstrong, A.; Baxter, C. A.; Lamont, S. G.; Pape, A. R.; Wincewicz, R. *Org. Lett.* **2007**, 9, 351–353. (b) Chandra, D.; Kumar, P.; Yadav, A. K.; Kumar, G.; Jat, J. L. *ChemistrySelect* **2022**, 7, e202200267.

### 3. X-ray Crystallography Data of **6a**

**Crystal sample preparation of 6a:** A solution of compound **6a** (20 mg) in AcOEt (0.8 mL) was placed in a vial (10 mL). Then petroleum ether (5 mL) was added to the solution with a dropper. The single crystal **6a** was obtained by slowly evaporating mixed solvent at room temperature under the air conditions. A suitable crystal was selected and tested on a Bruker D8 Quest diffractometer. The crystal was kept at 296.0 K during data collection. Using Olex2 [1], the structure was solved with the SHELXT [2] structure solution program using Intrinsic Phasing and refined with the SHELXL [3] refinement package using Least Squares minimisation.

1. Dolomanov, O.V., Bourhis, L.J., Gildea, R.J, Howard, J.A.K. & Puschmann, H.

(2009), J. Appl. Cryst. 42, 339-341.

2. Sheldrick, G.M. (2015). Acta Cryst. A71, 3-8.

3. Sheldrick, G.M. (2015). Acta Cryst. C71, 3-8.

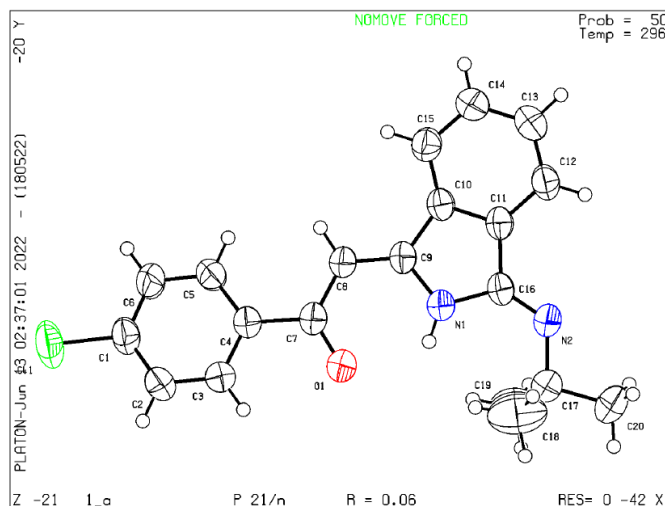

**Figure S1.** X-ray crystal structure of **6a** is drawn at the 50% probability.

**Table S1** Crystal data and structure refinement for **6a**.

|                                 |                                                     |                   |
|---------------------------------|-----------------------------------------------------|-------------------|
| Identification code             | <b>6a</b>                                           |                   |
| Empirical formula               | C <sub>20</sub> H <sub>19</sub> Cl N <sub>2</sub> O |                   |
| Formula weight                  | 338.82                                              |                   |
| Temperature                     | 296(2) K                                            |                   |
| Wavelength                      | 0.71073 Å                                           |                   |
| Crystal system                  | Monoclinic                                          |                   |
| Space group                     | P2 <sub>1</sub> /n                                  |                   |
| Unit cell dimensions            | a = 9.876(5) Å                                      | α = 90 °          |
|                                 | b = 17.391(9) Å                                     | β = 101.377(10) ° |
|                                 | c = 10.776(5) Å                                     | γ = 90 °          |
| Volume                          | 1814.4(14) Å <sup>3</sup>                           |                   |
| Z                               | 4                                                   |                   |
| Density (calculated)            | 1.240 Mg/m <sup>3</sup>                             |                   |
| Absorption coefficient          | 0.219 mm <sup>-1</sup>                              |                   |
| F(000)                          | 712                                                 |                   |
| Crystal size                    | 0.200 x 0.200 x 0.200 mm <sup>3</sup>               |                   |
| Theta range for data collection | 2.408 to 25.160 °                                   |                   |

|                                   |                                             |
|-----------------------------------|---------------------------------------------|
| Index ranges                      | -11<=h<=10, -20<=k<=20, -12<=l<=12          |
| Reflections collected             | 27362                                       |
| Independent reflections           | 3220 [R(int) = 0.0748]                      |
| Completeness to theta = 25.160 °  | 98.8 %                                      |
| Absorption correction             | Semi-empirical from equivalents             |
| Refinement method                 | Full-matrix least-squares on F <sup>2</sup> |
| Data / restraints / parameters    | 3220 / 0 / 220                              |
| Goodness-of-fit on F <sup>2</sup> | 1.019                                       |
| Final R indices [I>2sigma(I)]     | R1 = 0.0595, wR2 = 0.1333                   |
| R indices (all data)              | R1 = 0.1145, wR2 = 0.1648                   |
| Extinction coefficient            | n/a                                         |
| Largest diff. peak and hole       | 0.297 and -0.303 e.Å <sup>-3</sup>          |

**Table S2** Atomic coordinates ( x 10<sup>4</sup>) and equivalent isotropic displacement parameters (Å<sup>2</sup>x 10<sup>3</sup>)  
For **6a**. U(eq) is defined as one third of the trace of the orthogonalized U<sup>ij</sup> tensor.

|       | x        | y       | z       | U(eq)  |
|-------|----------|---------|---------|--------|
| C(1)  | -1845(3) | 6315(2) | 3084(3) | 60(1)  |
| C(2)  | -1399(3) | 5918(2) | 4176(3) | 62(1)  |
| C(3)  | -48(3)   | 5996(2) | 4804(3) | 58(1)  |
| C(4)  | 874(3)   | 6462(2) | 4333(3) | 48(1)  |
| C(5)  | 381(4)   | 6853(2) | 3225(3) | 78(1)  |
| C(6)  | -975(4)  | 6789(3) | 2607(3) | 89(1)  |
| C(7)  | 2351(3)  | 6473(2) | 5001(3) | 50(1)  |
| C(8)  | 3324(3)  | 6990(2) | 4604(3) | 50(1)  |
| C(9)  | 4692(3)  | 6976(2) | 5130(3) | 46(1)  |
| C(10) | 5814(3)  | 7480(2) | 4903(3) | 47(1)  |
| C(11) | 7013(3)  | 7265(2) | 5744(3) | 47(1)  |
| C(12) | 8244(3)  | 7655(2) | 5766(3) | 58(1)  |
| C(13) | 8233(3)  | 8252(2) | 4926(3) | 69(1)  |
| C(14) | 7049(4)  | 8453(2) | 4066(3) | 67(1)  |
| C(15) | 5819(3)  | 8075(2) | 4046(3) | 58(1)  |
| C(16) | 6708(3)  | 6592(2) | 6482(3) | 46(1)  |
| C(17) | 7247(3)  | 5537(2) | 7961(3) | 63(1)  |
| C(18) | 6200(6)  | 5709(3) | 8786(4) | 121(2) |

|       |          |         |         |        |
|-------|----------|---------|---------|--------|
| C(19) | 6669(5)  | 4903(2) | 7031(4) | 99(1)  |
| C(20) | 8601(5)  | 5256(3) | 8731(6) | 173(3) |
| Cl(1) | -3557(1) | 6226(1) | 2303(1) | 93(1)  |
| N(1)  | 5288(2)  | 6466(1) | 6051(2) | 52(1)  |
| N(2)  | 7584(2)  | 6236(1) | 7297(2) | 53(1)  |
| O(1)  | 2714(2)  | 6013(1) | 5893(2) | 67(1)  |

**Table S3** Bond lengths [Å] and angles [°] for **6a**.

|             | Bond lengths [Å] |                 | angles [°] |
|-------------|------------------|-----------------|------------|
| C(1)-C(2)   | 1.360(4)         | C(2)-C(1)-C(6)  | 120.8(3)   |
| C(1)-C(6)   | 1.362(5)         | C(2)-C(1)-Cl(1) | 119.4(3)   |
| C(1)-Cl(1)  | 1.740(3)         | C(6)-C(1)-Cl(1) | 119.8(3)   |
| C(2)-C(3)   | 1.378(4)         | C(1)-C(2)-C(3)  | 119.5(3)   |
| C(2)-H(2)   | 0.9300           | C(1)-C(2)-H(2)  | 120.2      |
| C(3)-C(4)   | 1.388(4)         | C(3)-C(2)-H(2)  | 120.2      |
| C(3)-H(3)   | 0.9300           | C(2)-C(3)-C(4)  | 121.3(3)   |
| C(4)-C(5)   | 1.377(4)         | C(2)-C(3)-H(3)  | 119.4      |
| C(4)-C(7)   | 1.494(4)         | C(4)-C(3)-H(3)  | 119.4      |
| C(5)-C(6)   | 1.377(5)         | C(5)-C(4)-C(3)  | 117.4(3)   |
| C(5)-H(5)   | 0.9300           | C(5)-C(4)-C(7)  | 123.8(3)   |
| C(6)-H(6)   | 0.9300           | C(3)-C(4)-C(7)  | 118.7(3)   |
| C(7)-O(1)   | 1.247(4)         | C(6)-C(5)-C(4)  | 121.5(3)   |
| C(7)-C(8)   | 1.441(4)         | C(6)-C(5)-H(5)  | 119.2      |
| C(8)-C(9)   | 1.358(4)         | C(4)-C(5)-H(5)  | 119.2      |
| C(8)-H(8)   | 0.9300           | C(1)-C(6)-C(5)  | 119.5(3)   |
| C(9)-N(1)   | 1.374(4)         | C(1)-C(6)-H(6)  | 120.3      |
| C(9)-C(10)  | 1.471(4)         | C(5)-C(6)-H(6)  | 120.3      |
| C(10)-C(15) | 1.387(4)         | O(1)-C(7)-C(8)  | 121.5(3)   |
| C(10)-C(11) | 1.393(4)         | O(1)-C(7)-C(4)  | 117.9(3)   |
| C(11)-C(12) | 1.389(4)         | C(8)-C(7)-C(4)  | 120.6(3)   |
| C(11)-C(16) | 1.479(4)         | C(9)-C(8)-C(7)  | 122.1(3)   |
| C(12)-C(13) | 1.376(5)         | C(9)-C(8)-H(8)  | 118.9      |
| C(12)-H(12) | 0.9300           | C(7)-C(8)-H(8)  | 118.9      |
| C(13)-C(14) | 1.386(5)         | C(8)-C(9)-N(1)  | 124.2(3)   |
| C(13)-H(13) | 0.9300           | C(8)-C(9)-C(10) | 129.8(3)   |
| C(14)-C(15) | 1.377(5)         | N(1)-C(9)-C(10) | 106.0(2)   |



|              |          |                     |          |
|--------------|----------|---------------------|----------|
| C(14)-H(14)  | 0.9300   | C(15)-C(10)-C(11)   | 121.2(3) |
| C(15)-H(15)  | 0.9300   | C(15)-C(10)-C(9)    | 131.1(3) |
| C(16)-N(2)   | 1.267(3) | C(11)-C(10)-C(9)    | 107.7(3) |
| C(16)-N(1)   | 1.404(4) | C(12)-C(11)-C(10)   | 120.6(3) |
| C(17)-N(2)   | 1.482(4) | C(12)-C(11)-C(16)   | 130.4(3) |
| C(17)-C(20)  | 1.510(5) | C(10)-C(11)-C(16)   | 109.0(2) |
| C(17)-C(18)  | 1.521(6) | C(13)-C(12)-C(11)   | 117.6(3) |
| C(17)-C(19)  | 1.523(5) | C(13)-C(12)-H(12)   | 121.2    |
| C(18)-H(18A) | 0.9600   | C(11)-C(12)-H(12)   | 121.2    |
| C(18)-H(18B) | 0.9600   | C(12)-C(13)-C(14)   | 121.7(3) |
| C(18)-H(18C) | 0.9600   | C(12)-C(13)-H(13)   | 119.1    |
| C(19)-H(19A) | 0.9600   | C(14)-C(13)-H(13)   | 119.1    |
| C(19)-H(19B) | 0.9600   | C(15)-C(14)-C(13)   | 121.0(3) |
| C(19)-H(19C) | 0.9600   | C(15)-C(14)-H(14)   | 119.5    |
| C(20)-H(20A) | 0.9600   | C(13)-C(14)-H(14)   | 119.5    |
| C(20)-H(20B) | 0.9600   | C(14)-C(15)-C(10)   | 117.7(3) |
| C(20)-H(20C) | 0.9600   | C(14)-C(15)-H(15)   | 121.2    |
| N(1)-H(1)    | 0.8600   | C(10)-C(15)-H(15)   | 121.2    |
|              |          | N(2)-C(16)-N(1)     | 130.9(3) |
|              |          | N(2)-C(16)-C(11)    | 125.1(3) |
|              |          | N(1)-C(16)-C(11)    | 104.0(2) |
|              |          | N(2)-C(17)-C(20)    | 105.8(3) |
|              |          | N(2)-C(17)-C(18)    | 111.4(3) |
|              |          | C(20)-C(17)-C(18)   | 111.9(4) |
|              |          | N(2)-C(17)-C(19)    | 111.5(3) |
|              |          | C(20)-C(17)-C(19)   | 107.7(4) |
|              |          | C(18)-C(17)-C(19)   | 108.5(3) |
|              |          | C(17)-C(18)-H(18A)  | 109.5    |
|              |          | C(17)-C(18)-H(18B)  | 109.5    |
|              |          | H(18A)-C(18)-H(18B) | 109.5    |
|              |          | C(17)-C(18)-H(18C)  | 109.5    |
|              |          | H(18A)-C(18)-H(18C) | 109.5    |
|              |          | H(18B)-C(18)-H(18C) | 109.5    |
|              |          | C(17)-C(19)-H(19A)  | 109.5    |
|              |          | C(17)-C(19)-H(19B)  | 109.5    |
|              |          | H(19A)-C(19)-H(19B) | 109.5    |
|              |          | C(17)-C(19)-H(19C)  | 109.5    |

|  |  |                     |          |
|--|--|---------------------|----------|
|  |  | H(19A)-C(19)-H(19C) | 109.5    |
|  |  | H(19B)-C(19)-H(19C) | 109.5    |
|  |  | C(17)-C(20)-H(20A)  | 109.5    |
|  |  | C(17)-C(20)-H(20B)  | 109.5    |
|  |  | H(20A)-C(20)-H(20B) | 109.5    |
|  |  | C(17)-C(20)-H(20C)  | 109.5    |
|  |  | H(20A)-C(20)-H(20C) | 109.5    |
|  |  | H(20B)-C(20)-H(20C) | 109.5    |
|  |  | C(9)-N(1)-C(16)     | 113.3(2) |
|  |  | C(9)-N(1)-H(1)      | 123.3    |
|  |  | C(16)-N(1)-H(1)     | 123.3    |
|  |  | C(16)-N(2)-C(17)    | 123.2(3) |

Symmetry transformations used to generate equivalent atoms:

**Table S4** Anisotropic displacement parameters ( $\text{\AA}^2 \times 10^3$ ) for **6a**. The anisotropic displacement factor exponent takes the form:  $-2\pi^2 [ h^2 a^{*2} U^{11} + \dots + 2 h k a^* b^* U^{12} ]$

|       | U <sup>11</sup> | U <sup>22</sup> | U <sup>33</sup> | U <sup>23</sup> | U <sup>13</sup> | U <sup>12</sup> |
|-------|-----------------|-----------------|-----------------|-----------------|-----------------|-----------------|
| C(1)  | 42(2)           | 80(2)           | 55(2)           | -5(2)           | 2(2)            | -5(2)           |
| C(2)  | 45(2)           | 66(2)           | 76(2)           | 5(2)            | 13(2)           | -7(2)           |
| C(3)  | 48(2)           | 62(2)           | 62(2)           | 12(2)           | 8(2)            | -2(2)           |
| C(4)  | 41(2)           | 52(2)           | 48(2)           | -2(1)           | 6(1)            | -1(1)           |
| C(5)  | 51(2)           | 113(3)          | 66(2)           | 35(2)           | -2(2)           | -24(2)          |
| C(6)  | 55(2)           | 134(4)          | 67(2)           | 42(2)           | -12(2)          | -19(2)          |
| C(7)  | 42(2)           | 56(2)           | 49(2)           | 0(2)            | 2(1)            | 1(2)            |
| C(8)  | 42(2)           | 54(2)           | 49(2)           | 3(1)            | -1(1)           | -3(1)           |
| C(9)  | 40(2)           | 51(2)           | 46(2)           | -4(1)           | 2(1)            | 0(1)            |
| C(10) | 42(2)           | 51(2)           | 46(2)           | -6(1)           | 4(1)            | -2(1)           |
| C(11) | 41(2)           | 51(2)           | 46(2)           | -7(1)           | 3(1)            | -1(1)           |
| C(12) | 41(2)           | 67(2)           | 63(2)           | -1(2)           | 3(2)            | -4(2)           |
| C(13) | 52(2)           | 76(2)           | 77(2)           | 5(2)            | 10(2)           | -13(2)          |
| C(14) | 62(2)           | 67(2)           | 70(2)           | 11(2)           | 7(2)            | -11(2)          |
| C(15) | 53(2)           | 59(2)           | 57(2)           | 1(2)            | 1(2)            | -1(2)           |
| C(16) | 38(2)           | 52(2)           | 45(2)           | -8(1)           | 5(1)            | -2(1)           |
| C(17) | 56(2)           | 62(2)           | 68(2)           | 12(2)           | 1(2)            | -3(2)           |
| C(18) | 183(5)          | 109(4)          | 87(3)           | 10(3)           | 69(3)           | 4(3)            |

|       |        |        |        |        |        |        |
|-------|--------|--------|--------|--------|--------|--------|
| C(19) | 127(4) | 62(2)  | 109(3) | 4(2)   | 29(3)  | -5(2)  |
| C(20) | 85(3)  | 153(5) | 242(7) | 133(5) | -61(4) | -28(3) |
| Cl(1) | 45(1)  | 139(1) | 86(1)  | -7(1)  | -6(1)  | -14(1) |
| N(1)  | 43(2)  | 55(2)  | 55(2)  | 6(1)   | 1(1)   | -4(1)  |
| N(2)  | 44(1)  | 58(2)  | 54(2)  | 4(1)   | 0(1)   | 1(1)   |
| O(1)  | 51(1)  | 77(2)  | 68(1)  | 20(1)  | -2(1)  | -6(1)  |

**Table S5** Hydrogen coordinates ( $\times 10^4$ ) and isotropic displacement parameters ( $\text{\AA}^2 \times 10^3$ ) for **6a**.

|        | x     | y    | z    | U(eq) |
|--------|-------|------|------|-------|
| H(2)   | -2000 | 5597 | 4496 | 75    |
| H(3)   | 251   | 5731 | 5558 | 69    |
| H(5)   | 978   | 7166 | 2885 | 94    |
| H(6)   | -1294 | 7068 | 1871 | 107   |
| H(8)   | 3004  | 7345 | 3968 | 60    |
| H(12)  | 9048  | 7518 | 6329 | 70    |
| H(13)  | 9041  | 8529 | 4935 | 82    |
| H(14)  | 7086  | 8848 | 3493 | 81    |
| H(15)  | 5021  | 8214 | 3478 | 69    |
| H(18A) | 5320  | 5821 | 8257 | 181   |
| H(18B) | 6503  | 6145 | 9315 | 181   |
| H(18C) | 6114  | 5271 | 9306 | 181   |
| H(19A) | 6613  | 4433 | 7485 | 148   |
| H(19B) | 7265  | 4832 | 6437 | 148   |
| H(19C) | 5764  | 5046 | 6586 | 148   |
| H(20A) | 8966  | 5634 | 9357 | 259   |
| H(20B) | 9245  | 5173 | 8183 | 259   |
| H(20C) | 8454  | 4782 | 9142 | 259   |
| H(1)   | 4837  | 6105 | 6334 | 62    |

**Table S6** Torsion angles [ $^\circ$ ] for **6a**.

|                      |           |
|----------------------|-----------|
| C(6)-C(1)-C(2)-C(3)  | -0.2(5)   |
| Cl(1)-C(1)-C(2)-C(3) | -179.2(3) |
| C(1)-C(2)-C(3)-C(4)  | -1.1(5)   |

|                         |           |
|-------------------------|-----------|
| C(2)-C(3)-C(4)-C(5)     | 0.9(5)    |
| C(2)-C(3)-C(4)-C(7)     | -175.1(3) |
| C(3)-C(4)-C(5)-C(6)     | 0.4(6)    |
| C(7)-C(4)-C(5)-C(6)     | 176.3(4)  |
| C(2)-C(1)-C(6)-C(5)     | 1.5(6)    |
| Cl(1)-C(1)-C(6)-C(5)    | -179.5(3) |
| C(4)-C(5)-C(6)-C(1)     | -1.6(7)   |
| C(5)-C(4)-C(7)-O(1)     | -170.0(3) |
| C(3)-C(4)-C(7)-O(1)     | 5.9(4)    |
| C(5)-C(4)-C(7)-C(8)     | 8.9(5)    |
| C(3)-C(4)-C(7)-C(8)     | -175.3(3) |
| O(1)-C(7)-C(8)-C(9)     | 3.6(5)    |
| C(4)-C(7)-C(8)-C(9)     | -175.1(3) |
| C(7)-C(8)-C(9)-N(1)     | 1.8(5)    |
| C(7)-C(8)-C(9)-C(10)    | -176.2(3) |
| C(8)-C(9)-C(10)-C(15)   | -4.5(5)   |
| N(1)-C(9)-C(10)-C(15)   | 177.2(3)  |
| C(8)-C(9)-C(10)-C(11)   | 175.7(3)  |
| N(1)-C(9)-C(10)-C(11)   | -2.7(3)   |
| C(15)-C(10)-C(11)-C(12) | 1.6(4)    |
| C(9)-C(10)-C(11)-C(12)  | -178.5(3) |
| C(15)-C(10)-C(11)-C(16) | -176.9(3) |
| C(9)-C(10)-C(11)-C(16)  | 3.0(3)    |
| C(10)-C(11)-C(12)-C(13) | -0.5(5)   |
| C(16)-C(11)-C(12)-C(13) | 177.6(3)  |
| C(11)-C(12)-C(13)-C(14) | -1.3(5)   |
| C(12)-C(13)-C(14)-C(15) | 2.1(6)    |
| C(13)-C(14)-C(15)-C(10) | -1.0(5)   |
| C(11)-C(10)-C(15)-C(14) | -0.8(4)   |
| C(9)-C(10)-C(15)-C(14)  | 179.4(3)  |
| C(12)-C(11)-C(16)-N(2)  | -1.0(5)   |
| C(10)-C(11)-C(16)-N(2)  | 177.3(3)  |
| C(12)-C(11)-C(16)-N(1)  | 179.6(3)  |
| C(10)-C(11)-C(16)-N(1)  | -2.2(3)   |

|                        |           |
|------------------------|-----------|
| C(8)-C(9)-N(1)-C(16)   | -177.1(3) |
| C(10)-C(9)-N(1)-C(16)  | 1.3(3)    |
| N(2)-C(16)-N(1)-C(9)   | -179.0(3) |
| C(11)-C(16)-N(1)-C(9)  | 0.5(3)    |
| N(1)-C(16)-N(2)-C(17)  | 3.0(5)    |
| C(11)-C(16)-N(2)-C(17) | -176.3(3) |
| C(20)-C(17)-N(2)-C(16) | 174.1(4)  |
| C(18)-C(17)-N(2)-C(16) | -64.0(4)  |
| C(19)-C(17)-N(2)-C(16) | 57.3(4)   |

**Table S7** Hydrogen bonds for **6a** [Å and °].

| D-H...A          | d(D-H) | d(H...A) | d(D...A) | <(DHA) |
|------------------|--------|----------|----------|--------|
| N(1)-H(1)...O(1) | 0.86   | 2.06     | 2.635(3) | 123.3  |

Symmetry transformations used to generate equivalent atoms:

#### 4. Characterization Datas

##### ***Anti* (3-(2-bromophenyl)aziridin-2-yl)(4-chlorophenyl)methanone (4a):**

White solid, yield: 0.534g (80%), dr > 20:1, determined by <sup>1</sup>H NMR spectrum, ethylacetate/petroleum ether = 1: 25, mp 104–106 °C. <sup>1</sup>H NMR (CDCl<sub>3</sub>, 400 MHz) δ (ppm) 8.03-7.17 (m, 8H), 3.41-3.32 (m, 2H), 2.61 (s, *J* = 8.4 Hz, 1H); <sup>13</sup>C {<sup>1</sup>H} NMR (CDCl<sub>3</sub>, 100 MHz) δ (ppm) 194.7, 140.4, 137.4, 134.0, 132.2, 129.9, 129.3, 129.1, 128.1, 127.6, 124.0, 44.2, 42.7; HRMS (ESI-TOF) *m/z*: [M + H]<sup>+</sup> Calcd for C<sub>15</sub>H<sub>12</sub>BrClNO 335.9785; Found 335.9800.

##### ***Anti* (3-(2-bromophenyl)aziridin-2-yl)(2,4-dichlorophenyl)methanone (4b):**

White solid, yield: 0.568g (77%), dr > 20:1, determined by <sup>1</sup>H NMR spectrum, ethylacetate/petroleum ether = 1: 22, mp 90–92 °C. <sup>1</sup>H NMR (CDCl<sub>3</sub>, 400 MHz) δ (ppm) 7.69-7.14 (m, 7H), 3.57-3.22 (m, 2H), 2.63 (t, *J* = 8.4 Hz, 1H); <sup>13</sup>C {<sup>1</sup>H} NMR (CDCl<sub>3</sub>, 100 MHz) δ (ppm) 196.9, 138.7, 137.0, 135.2, 133.4, 132.4, 131.2, 130.8, 129.3, 127.7, 127.5, 127.4, 124.1, 46.4, 45.0; HRMS (ESI-TOF) *m/z*: [M + H]<sup>+</sup> Calcd for C<sub>15</sub>H<sub>11</sub>BrCl<sub>2</sub>NO 369.9396; Found 369.9408.

##### ***Anti* (3-(2-bromophenyl)aziridin-2-yl)(4-fluorophenyl)methanone (4c):**

White solid, yield: 0.472g (74%), dr > 20:1, determined by <sup>1</sup>H NMR spectrum, ethylacetate/petroleum ether = 1: 22, mp 62–63 °C. <sup>1</sup>H NMR (CDCl<sub>3</sub>, 400 MHz) δ (ppm) 8.13-7.15 (m, 8H), 3.41-3.32 (m, 2H), 2.61 (t, *J* = 8.4 Hz, 1H); <sup>13</sup>C {<sup>1</sup>H} NMR (CDCl<sub>3</sub>, 100 MHz) δ (ppm) 194.3, 166.2 (d, *J*<sub>C-F</sub> = 254.0 Hz), 137.5, 132.2, 131.3, 131.2, 129.2, 128.1, 127.6, 124.0, 116.0 (d, *J*<sub>C-F</sub> = 21.0 Hz), 44.0, 42.6; HRMS (ESI-TOF) m/z: [M + H]<sup>+</sup> Calcd for C<sub>15</sub>H<sub>12</sub>BrFNO 320.0081; Found 320.0085.

***Anti* (3-(2-bromophenyl)aziridin-2-yl)(phenyl)methanone (4d):**

White solid, yield: 0.470g (78%), dr > 20:1, determined by <sup>1</sup>H NMR spectrum, ethylacetate/petroleum ether = 1: 22, mp 89–90 °C. <sup>1</sup>H NMR (CDCl<sub>3</sub>, 400 MHz) δ (ppm) 8.08-7.16 (m, 9H), 3.42-3.38 (m, 2H), 2.62 (t, *J* = 8.0 Hz, 1H); <sup>13</sup>C {<sup>1</sup>H} NMR (CDCl<sub>3</sub>, 100 MHz) δ (ppm) 195.8, 137.6, 135.7, 133.8, 132.2, 129.2, 128.7, 128.5, 128.0, 127.6, 124.1, 44.0, 42.8; HRMS (ESI-TOF) m/z: [M + H]<sup>+</sup> Calcd for C<sub>15</sub>H<sub>13</sub>BrNO 302.0175; Found 302.0180.

***Anti* (3-(2-bromophenyl)aziridin-2-yl)(p-tolyl)methanone (4e):**

White solid, yield: 0.472g (70%), dr > 20:1, determined by <sup>1</sup>H NMR spectrum, ethylacetate/petroleum ether = 1: 25, mp 102–103 °C. <sup>1</sup>H NMR (CDCl<sub>3</sub>, 400 MHz) δ (ppm) 7.99-7.16 (m, 8H), 3.39-3.36 (m, 2H), 2.60 (t, *J* = 8.0 Hz, 1H), 2.43 (s, 3H); <sup>13</sup>C {<sup>1</sup>H} NMR (CDCl<sub>3</sub>, 100 MHz) δ (ppm) 195.3, 144.9, 137.7, 133.2, 132.2, 129.4, 129.1, 128.7, 128.0, 127.6, 124.1, 43.8, 42.6, 21.8; HRMS (ESI-TOF) m/z: [M + H]<sup>+</sup> Calcd for C<sub>16</sub>H<sub>14</sub>BrNO 338.1186; Found 338.1194.

***Anti* (3-(2-bromo-5-fluorophenyl)aziridin-2-yl)(phenyl)methanone (4f):**

White solid, yield: 0.485g (76%), dr > 20:1, determined by <sup>1</sup>H NMR spectrum, ethylacetate/petroleum ether = 1: 22, mp 91–93 °C. <sup>1</sup>H NMR (CDCl<sub>3</sub>, 400 MHz) δ (ppm) 8.07-7.26 (m, 6H), 6.93-6.89 (m, 2H), 3.38-3.36 (m, 2H), 2.63 (t, *J* = 8.0 Hz, 1H); <sup>13</sup>C {<sup>1</sup>H} NMR (CDCl<sub>3</sub>, 100 MHz) δ (ppm) 195.5, 162.3 (d, *J*<sub>C-F</sub> = 246.0 Hz), 140.0 (d, *J*<sub>C-F</sub> = 8.0 Hz), 135.7, 134.0, 133.4 (d, *J*<sub>C-F</sub> = 8.0 Hz), 128.8, 128.5, 117.9, 116.4 (d, *J*<sub>C-F</sub> = 23.0 Hz), 115.3 (d, *J*<sub>C-F</sub> = 24.0 Hz), 43.4, 42.8; HRMS (ESI-TOF) m/z: [M + H]<sup>+</sup> Calcd for C<sub>15</sub>H<sub>12</sub>BrFNO 320.0081; Found 320.0087.

***Anti* (3-(2-bromo-5-fluorophenyl)aziridin-2-yl)(4-chlorophenyl)methanone (4g):**

White solid, yield: 0.544g (77%), dr > 20:1, determined by <sup>1</sup>H NMR spectrum,

ethylacetate/petroleum ether = 1: 22, mp 108–109 °C. <sup>1</sup>H NMR (CDCl<sub>3</sub>, 400 MHz) δ (ppm) 8.01-6.92 (m, 7H), 3.37-3.31 (m, 2H), 2.63 (t, *J* = 8.0 Hz, 1H); <sup>13</sup>C {<sup>1</sup>H} NMR (CDCl<sub>3</sub>, 100 MHz) δ (ppm) 194.3, 162.3 (d, *J*<sub>C-F</sub> = 246.0 Hz), 140.6, 139.8 (d, *J*<sub>C-F</sub> = 8.0 Hz), 133.9, 133.5 (d, *J*<sub>C-F</sub> = 8.0 Hz), 129.9, 129.2, 117.8 (d, *J*<sub>C-F</sub> = 3.0 Hz), 116.5 (d, *J*<sub>C-F</sub> = 22.0 Hz), 115.4 (d, *J*<sub>C-F</sub> = 24.0 Hz), 43.7, 42.6; HRMS (ESI-TOF) *m/z*: [M + H]<sup>+</sup> Calcd for C<sub>15</sub>H<sub>11</sub>BrClFNO 353.9691; Found 353.9693.

***Anti* (3-(2-bromo-5-chlorophenyl)aziridin-2-yl)(phenyl)methanone (4h):**

White solid, yield: 0.503g (75%), dr > 20:1, determined by <sup>1</sup>H NMR spectrum, ethylacetate/petroleum ether = 1: 22, mp 106–108 °C. <sup>1</sup>H NMR (CDCl<sub>3</sub>, 400 MHz) δ (ppm) 8.07-7.15 (m, 8H), 3.39-3.34 (m, 2H), 2.63 (t, *J* = 8.4 Hz, 1H); <sup>13</sup>C {<sup>1</sup>H} NMR (CDCl<sub>3</sub>, 100 MHz) δ (ppm) 195.4, 139.4, 135.6, 134.0, 133.3, 129.9, 129.3, 128.8, 128.5, 128.2, 121.7, 43.3, 42.7; HRMS (ESI-TOF) *m/z*: [M + H]<sup>+</sup> Calcd for C<sub>15</sub>H<sub>12</sub>BrClNO 335.9785; Found 335.9794.

***Anti* (3-(2-bromo-5-chlorophenyl)aziridin-2-yl)(4-chlorophenyl)methanone (4i):**

White solid, yield: 0.627g (85%), dr > 20:1, determined by <sup>1</sup>H NMR spectrum, ethylacetate/petroleum ether = 1: 25, mp 146–147 °C. <sup>1</sup>H NMR (CDCl<sub>3</sub>, 400 MHz) δ (ppm) 8.01-7.15 (m, 7H), 3.36-3.32 (m, 2H), 2.62 (t, *J* = 8.0 Hz, 1H); <sup>13</sup>C {<sup>1</sup>H} NMR (CDCl<sub>3</sub>, 100 MHz) δ (ppm) 194.3, 140.6, 139.2, 134.0, 133.9, 133.3, 129.9, 129.4, 129.2, 128.3, 121.6, 43.6, 42.6; HRMS (ESI-TOF) *m/z*: [M + H]<sup>+</sup> Calcd for C<sub>15</sub>H<sub>11</sub>BrCl<sub>2</sub>NO 369.9396; Found 369.9403.

***Anti* (3-(2-bromo-4-fluorophenyl)aziridin-2-yl)(phenyl)methanone (4j):**

White solid, yield: 0.504g (79%), dr > 20:1, determined by <sup>1</sup>H NMR spectrum, ethylacetate/petroleum ether = 1: 22, mp 95–96 °C. <sup>1</sup>H NMR (CDCl<sub>3</sub>, 400 MHz) δ (ppm) 8.08-7.03 (m, 8H), 3.37-3.34 (m, 2H), 2.62 (t, *J* = 8.4 Hz, 1H); <sup>13</sup>C {<sup>1</sup>H} NMR (CDCl<sub>3</sub>, 100 MHz) δ (ppm) 195.6, 161.9 (d, *J*<sub>C-F</sub> = 250.0 Hz), 135.7, 133.9, 133.6 (d, *J*<sub>C-F</sub> = 3.0 Hz), 129.2 (d, *J*<sub>C-F</sub> = 8.0 Hz), 128.8, 128.5, 123.9 (d, *J*<sub>C-F</sub> = 10.0 Hz), 119.5 (d, *J*<sub>C-F</sub> = 24.0 Hz), 114.7 (d, *J*<sub>C-F</sub> = 20.0 Hz), 43.3, 42.7; HRMS (ESI-TOF) *m/z*: [M + H]<sup>+</sup> Calcd for C<sub>15</sub>H<sub>12</sub>BrFNO 320.0081; Found 320.0086.

***Anti* (3-(2-bromo-4-chlorophenyl)aziridin-2-yl)(phenyl)methanone (4k):**

White solid, yield: 0.536g (80%), dr > 20:1, determined by <sup>1</sup>H NMR spectrum,

ethylacetate/petroleum ether = 1: 22, mp 106–107 °C. <sup>1</sup>H NMR (CDCl<sub>3</sub>, 400 MHz) δ (ppm) 8.07–7.48 (m, 8H), 3.36–3.34 (m, 2H), 2.62 (t, *J* = 7.6 Hz, 1H); <sup>13</sup>C {<sup>1</sup>H} NMR (CDCl<sub>3</sub>, 100 MHz) δ (ppm) 195.5, 136.4, 135.7, 134.2, 134.0, 131.9, 128.9, 128.8, 128.5, 127.9, 124.2, 43.3, 42.8; HRMS (ESI-TOF) *m/z*: [M + H]<sup>+</sup> Calcd for C<sub>15</sub>H<sub>12</sub>BrClNO 335.9785; Found 335.9792.

***Anti* (3-(2-bromo-4-chlorophenyl)aziridin-2-yl)(4-chlorophenyl)methanone (4l):**

White solid, yield: 0.605g (82%), dr > 20:1, determined by <sup>1</sup>H NMR spectrum, ethylacetate/petroleum ether = 1: 25, mp 120–122 °C. <sup>1</sup>H NMR (CDCl<sub>3</sub>, 400 MHz) δ (ppm) 8.01–7.31 (m, 7H), 3.35–3.28 (m, 2H), 2.62 (t, *J* = 8.0 Hz, 1H); <sup>13</sup>C {<sup>1</sup>H} NMR (CDCl<sub>3</sub>, 100 MHz) δ (ppm) 194.4, 140.6, 136.2, 134.3, 133.9, 131.9, 129.9, 129.2, 129.0, 127.9, 124.1, 43.5, 42.6; HRMS (ESI-TOF) *m/z*: [M + H]<sup>+</sup> Calcd for C<sub>15</sub>H<sub>11</sub>BrCl<sub>2</sub>NO 369.9396; Found 369.9399.

**2-((1Z,3Z)-3-(Tert-butylimino)isoindolin-1-ylidene)-1-(4-chlorophenyl)ethan-1-one (6a):**

Light yellow solid, yield: 0.125g (74%), ethylacetate/petroleum ether = 1: 25, mp 123–125 °C. <sup>1</sup>H NMR (CDCl<sub>3</sub>, 400 MHz) δ (ppm) 11.47 (s, 1H), 7.98–7.26 (m, 8H), 6.59 (s, 1H); <sup>13</sup>C {<sup>1</sup>H} NMR (CDCl<sub>3</sub>, 100 MHz) δ (ppm) 189.8, 153.7, 148.2, 138.4, 137.5, 135.0, 134.6, 131.7, 130.5, 129.0, 128.8, 122.9, 120.8, 89.0, 54.8, 30.4; HRMS (ESI-TOF) *m/z*: [M + H]<sup>+</sup> Calcd for C<sub>20</sub>H<sub>20</sub>ClN<sub>2</sub>O 339.1259; Found 339.1268.

**2-((1Z,3Z)-3-(Tert-butylimino)isoindolin-1-ylidene)-1-(3,5-dichlorophenyl)ethan-1-one (6b):**

Light yellow solid, yield: 0.145g (78%), ethylacetate/petroleum ether = 1: 30, mp 169–171 °C. <sup>1</sup>H NMR (CDCl<sub>3</sub>, 400 MHz) δ (ppm) 11.27 (s, 1H), 7.94–7.33 (m, 7H), 6.38 (s, 1H), 1.54 (s, 9H); <sup>13</sup>C {<sup>1</sup>H} NMR (CDCl<sub>3</sub>, 100 MHz) δ (ppm) 191.2, 153.3, 148.1, 136.6, 135.0, 134.4, 132.0, 131.8, 130.6, 130.6, 130.2, 127.3, 122.9, 121.0, 93.3, 55.0, 30.4; HRMS (ESI-TOF) *m/z*: [M + H]<sup>+</sup> Calcd for C<sub>20</sub>H<sub>19</sub>Cl<sub>2</sub>N<sub>2</sub>O 373.0869; Found 373.0876.

**2-((1Z,3Z)-3-(Tert-butylimino)isoindolin-1-ylidene)-1-(4-fluorophenyl)ethan-1-one (6c):**

Light yellow solid, yield: 0.116g (72%), ethylacetate/petroleum ether = 1: 25, mp



142–143 °C. <sup>1</sup>H NMR (CDCl<sub>3</sub>, 400 MHz) δ (ppm) 11.45 (s, 1H), 8.08-7.14 (m, 8H), 6.60 (s, 1H), 1.54 (s, 9H); <sup>13</sup>C {<sup>1</sup>H} NMR (CDCl<sub>3</sub>, 100 MHz) δ (ppm) 189.7, 165.2 (d, *J*<sub>C-F</sub> = 252.0 Hz), 153.5, 148.2, 135.5 (d, *J*<sub>C-F</sub> = 3.0 Hz), 134.7, 131.6, 130.4, 130.1 (d, *J*<sub>C-F</sub> = 9.0 Hz), 122.8, 120.8, 115.6 (d, *J*<sub>C-F</sub> = 21.0 Hz), 89.0, 54.8, 30.4; HRMS (ESI-TOF) *m/z*: [M + H]<sup>+</sup> Calcd for C<sub>20</sub>H<sub>20</sub>FN<sub>2</sub>O 323.1554; Found 323.1559.

**2-((1Z,3Z)-3-(Tert-butylimino)isoindolin-1-ylidene)-1-phenylethan-1-one (6d):**

Light yellow solid, yield: 0.106g (70%), ethylacetate/petroleum ether = 1: 28, mp 120–122 °C. <sup>1</sup>H NMR (CDCl<sub>3</sub>, 400 MHz) δ (ppm) 11.48 (s, 1H), 8.05-7.50 (m, 9H), 6.67 (s, 1H), 1.55 (s, 9H); <sup>13</sup>C {<sup>1</sup>H} NMR (CDCl<sub>3</sub>, 100 MHz) δ (ppm) 191.4, 153.3, 148.4, 139.2, 135.1, 134.8, 132.2, 131.5, 130.4, 128.6, 127.6, 122.8, 89.4, 54.7, 30.4; HRMS (ESI-TOF) *m/z*: [M + H]<sup>+</sup> Calcd for C<sub>20</sub>H<sub>21</sub>N<sub>2</sub>O 305.1648; Found 305.1658.

**2-((1Z,3Z)-3-(Tert-butylimino)isoindolin-1-ylidene)-1-(p-tolyl)ethan-1-one (6e):**

Light yellow solid, yield: 0.108g (68%), ethylacetate/petroleum ether = 1: 30, mp 117–118 °C. <sup>1</sup>H NMR (CDCl<sub>3</sub>, 400 MHz) δ (ppm) 11.40 (s, 1H), 7.88-7.20 (m, 8H), 6.57 (s, 1H), 2.34 (s, 3H), 1.46 (s, 9H); <sup>13</sup>C {<sup>1</sup>H} NMR (CDCl<sub>3</sub>, 100 MHz) δ (ppm) 191.0, 152.9, 148.5, 142.9, 136.5, 135.1, 134.8, 131.4, 130.4, 129.2, 127.1, 120.7, 89.4, 54.6, 30.4, 21.6; HRMS (ESI-TOF) *m/z*: [M + H]<sup>+</sup> Calcd for C<sub>21</sub>H<sub>23</sub>N<sub>2</sub>O 319.1805; Found 319.1809.

**2-((1Z,3Z)-3-(Tert-butylimino)-6-fluoroisoindolin-1-ylidene)-1-phenylethan-1-one (6f):**

Light yellow solid, yield: 0.111g (69%), ethylacetate/petroleum ether = 1: 28, mp 102–104 °C. <sup>1</sup>H NMR (CDCl<sub>3</sub>, 400 MHz) δ (ppm) 11.44 (s, 1H), 8.04-7.24 (m, 8H), 6.60 (s, 1H), 1.53 (s, 9H); <sup>13</sup>C {<sup>1</sup>H} NMR (CDCl<sub>3</sub>, 100 MHz) δ (ppm) 191.3, 164.4 (d, *J*<sub>C-F</sub> = 248.0 Hz), 152.0 (d, *J*<sub>C-F</sub> = 3.0 Hz), 147.3, 138.9, 136.8 (d, *J*<sub>C-F</sub> = 10.0 Hz), 132.3, 128.6, 127.6, 124.7 (d, *J*<sub>C-F</sub> = 9.0 Hz), 119.0 (d, *J*<sub>C-F</sub> = 23.0 Hz), 107.7 (d, *J*<sub>C-F</sub> = 25.0 Hz), 89.8, 54.8, 30.4; HRMS (ESI-TOF) *m/z*: [M + H]<sup>+</sup> Calcd for C<sub>20</sub>H<sub>20</sub>FN<sub>2</sub>O 323.1554; Found 323.1558.

**2-((1Z,3Z)-3-(Tert-butylimino)-6-fluoroisoindolin-1-ylidene)-1-(4-chlorophenyl)ethan-1-one (6g):**

Light yellow solid, yield: 0.134g (75%), ethylacetate/petroleum ether = 1: 30, mp

145–147 °C. <sup>1</sup>H NMR (CDCl<sub>3</sub>, 400 MHz) δ (ppm) 11.42 (s, 1H), 7.98-7.25 (m, 7H), 6.54 (s, 1H), 1.53 (s, 9H); <sup>13</sup>C {<sup>1</sup>H} NMR (CDCl<sub>3</sub>, 100 MHz) δ (ppm) 189.9, 164.4 (d, *J*<sub>C-F</sub> = 248.0 Hz), 152.5, 147.1, 138.7, 137.3, 136.6 (d, *J*<sub>C-F</sub> = 10.0 Hz), 131.0, 129.0, 128.9, 124.8, 124.7, 119.2 (d, *J*<sub>C-F</sub> = 24.0 Hz), 107.8 (d, *J*<sub>C-F</sub> = 24.0 Hz), 89.4, 54.9, 30.4; HRMS (ESI-TOF) *m/z*: [M + H]<sup>+</sup> Calcd for C<sub>20</sub>H<sub>19</sub>ClFN<sub>2</sub>O 357.1164; Found 357.1172.

**2-((1Z,3Z)-3-(Tert-butylimino)-6-chloroisindolin-1-ylidene)-1-phenylethan-1-one (6h):**

Light yellow solid, yield: 0.122g (72%), ethylacetate/petroleum ether = 1: 25, mp 113–114 °C. <sup>1</sup>H NMR (CDCl<sub>3</sub>, 400 MHz) δ (ppm) 11.44 (s, 1H), 8.04-7.48 (m, 8H), 6.62 (m, 1H), 1.53 (s, 9H); <sup>13</sup>C {<sup>1</sup>H} NMR (CDCl<sub>3</sub>, 100 MHz) δ (ppm) 191.3, 147.3, 138.9, 136.6, 136.3, 133.5, 132.4, 131.6, 128.6, 128.1, 127.7, 121.0, 89.8, 54.9, 30.4; HRMS (ESI-TOF) *m/z*: [M + H]<sup>+</sup> Calcd for C<sub>20</sub>H<sub>20</sub>ClN<sub>2</sub>O 339.1259; Found 339.1268.

**2-((1Z,3Z)-3-(Tert-butylimino)-6-chloroisindolin-1-ylidene)-1-(4-chlorophenyl)ethan-1-one (6i):**

Light yellow solid, yield: 0.145g (78%), ethylacetate/petroleum ether = 1: 25, mp 181–183 °C. <sup>1</sup>H NMR (CDCl<sub>3</sub>, 400 MHz) δ (ppm) 11.35 (s, 1H), 7.90-7.19 (m, 7H), 6.48 (s, 1H), 1.45 (s, 9H); <sup>13</sup>C {<sup>1</sup>H} NMR (CDCl<sub>3</sub>, 100 MHz) δ (ppm) 189.9, 152.3, 147.2, 138.7, 137.2, 136.8, 136.2, 133.4, 131.8, 129.1, 128.9, 124.2, 121.1, 89.5, 55.0, 30.4; HRMS (ESI-TOF) *m/z*: [M + H]<sup>+</sup> Calcd for C<sub>20</sub>H<sub>19</sub>Cl<sub>2</sub>N<sub>2</sub>O 373.0869; Found 373.0875.

**2-((1Z,3Z)-3-(Tert-butylimino)-5-fluoroisindolin-1-ylidene)-1-phenylethan-1-one (6j):**

Light yellow solid, yield: 0.121g (75%), ethylacetate/petroleum ether = 1: 30, mp 132–133 °C. <sup>1</sup>H NMR (CDCl<sub>3</sub>, 400 MHz) δ (ppm) 11.49 (s, 1H), 8.04-7.22 (m, 8H), 6.62 (s, 1H), 1.53 (s, 9H); <sup>13</sup>C {<sup>1</sup>H} NMR (CDCl<sub>3</sub>, 100 MHz) δ (ppm) 191.3, 165.1 (d, *J*<sub>C-F</sub> = 250.0 Hz), 152.4, 147.3, 139.1, 137.9 (d, *J*<sub>C-F</sub> = 10.0 Hz), 132.3, 130.6, 130.6, 128.6, 127.6, 122.7, 122.6, 118.1 (d, *J*<sub>C-F</sub> = 25.0 Hz), 110.0 (d, *J*<sub>C-F</sub> = 24.0 Hz), 89.5, 54.9, 30.3; HRMS (ESI-TOF) *m/z*: [M + H]<sup>+</sup> Calcd for C<sub>20</sub>H<sub>20</sub>FN<sub>2</sub>O 323.1554; Found 323.1562.

**2-((1Z,3Z)-3-(Tert-butylimino)-5-chloroisoindolin-1-ylidene)-1-phenylethan-1-one (6k):**

Light yellow solid, yield: 0.130g (77%), ethylacetate/petroleum ether = 1: 28, mp 129–131 °C. <sup>1</sup>H NMR (CDCl<sub>3</sub>, 400 MHz) δ (ppm) 11.39 (s, 1H), 7.95-7.18 (m, 8H), 6.55 (s, 1H), 1.45 (s, 9H); <sup>13</sup>C {<sup>1</sup>H} NMR (CDCl<sub>3</sub>, 100 MHz) δ (ppm) 191.3, 152.2, 147.1, 139.0, 137.8, 136.8, 133.0, 132.3, 130.6, 128.6, 127.6, 123.1, 121.9, 89.7, 54.9, 30.3; HRMS (ESI-TOF) m/z: [M + H]<sup>+</sup> Calcd for C<sub>20</sub>H<sub>20</sub>ClN<sub>2</sub>O 339.1259; Found 339.1265.

**2-((1Z,3Z)-3-(Tert-butylimino)-5-chloroisoindolin-1-ylidene)-1-(4-chlorophenyl)ethan-1-one (6l):**

Light yellow solid, yield: 0.151g (81%), ethylacetate/petroleum ether = 1: 25, mp 168–170 °C. <sup>1</sup>H NMR (CDCl<sub>3</sub>, 400 MHz) δ (ppm) 11.45 (s, 1H), 7.97-7.45 (m, 7H), 6.55 (s, 1H), 1.52 (s, 9H); <sup>13</sup>C {<sup>1</sup>H} NMR (CDCl<sub>3</sub>, 100 MHz) δ (ppm) 189.8, 152.7, 146.9, 138.6, 138.0, 137.3, 136.8, 132.8, 130.7, 129.0, 128.9, 123.2, 121.9, 89.3, 55.0, 30.3; HRMS (ESI-TOF) m/z: [M + H]<sup>+</sup> Calcd for C<sub>20</sub>H<sub>19</sub>Cl<sub>2</sub>N<sub>2</sub>O 373.0869; Found 373.0874.

**2-((1Z,3Z)-3-(((3s,5s,7s)-Adamantan-1-yl)imino)isoindolin-1-ylidene)-1-(4-chlorophenyl)ethan-1-one (6m):**

Light yellow solid, yield: 0.150g (72%), ethylacetate/petroleum ether = 1: 30, mp 157–158 °C. <sup>1</sup>H NMR (CDCl<sub>3</sub>, 400 MHz) δ (ppm) 11.53 (s, 1H), 7.97-7.46 (m, 8H), 6.58 (s, 1H), 2.22-1.80 (m, 15H); <sup>13</sup>C {<sup>1</sup>H} NMR (CDCl<sub>3</sub>, 100 MHz) δ (ppm) 189.9, 153.7, 147.5, 138.4, 137.6, 135.2, 134.5, 131.7, 130.5, 129.1, 128.8, 123.0, 120.8, 88.9, 56.0, 43.0, 36.5, 29.8; HRMS (ESI-TOF) m/z: [M + H]<sup>+</sup> Calcd for C<sub>26</sub>H<sub>26</sub>ClN<sub>2</sub>O 417.1728; Found 417.1734.

**2-((1Z,3Z)-3-(((3s,5s,7s)-Adamantan-1-yl)imino)-6-chloroisoindolin-1-ylidene)-1-(4-chlorophenyl)ethan-1-one (6n):**

Light yellow solid, yield: 0.171g (76%), ethylacetate/petroleum ether = 1: 28, mp 182–183 °C. <sup>1</sup>H NMR (CDCl<sub>3</sub>, 400 MHz) δ (ppm) 11.40 (s, 1H), 7.90-7.38 (m, 7H), 6.46 (s, 1H), 2.14-1.69 (m, 15H); <sup>13</sup>C {<sup>1</sup>H} NMR (CDCl<sub>3</sub>, 100 MHz) δ (ppm) 189.8, 152.2, 146.4, 138.6, 137.3, 136.6, 136.1, 133.6, 131.7, 129.1, 128.8, 124.1, 121.0,

89.2, 56.1, 43.0, 36.5, 29.7; HRMS (ESI-TOF) m/z: [M + H]<sup>+</sup> Calcd for C<sub>26</sub>H<sub>25</sub>Cl<sub>2</sub>N<sub>2</sub>O 451.1338; Found 451.1348.

**2-((1Z,3Z)-3-(((3s,5s,7s)-Adamantan-1-yl)imino)-5-chloroisoindolin-1-ylidene)-1-(4-chlorophenyl)ethan-1-one (6o):**

Light yellow solid, yield: 0.160g (71%), ethylacetate/petroleum ether = 1: 28, mp 216–218 °C. <sup>1</sup>H NMR (CDCl<sub>3</sub>, 400 MHz) δ (ppm) 11.50 (s, 1H), 7.97-7.44 (m, 7H), 6.52 (s, 1H), 2.22-1.76 (m, 15H); <sup>13</sup>C {<sup>1</sup>H} NMR (CDCl<sub>3</sub>, 100 MHz) δ (ppm) 189.8, 152.7, 146.0, 138.5, 137.9, 137.4, 137.0, 132.7, 130.6, 129.0, 128.8, 123.2, 121.9, 89.1, 56.2, 43.0, 36.5, 29.7; HRMS (ESI-TOF) m/z: [M + H]<sup>+</sup> Calcd for C<sub>26</sub>H<sub>25</sub>Cl<sub>2</sub>N<sub>2</sub>O 451.1338; Found 451.1345.

**2-((1Z,3Z)-6-Chloro-3-((2,4,4-trimethylpentan-2-yl)imino)isoindolin-1-ylidene)-1-phenylethan-1-one (6p):**

Light yellow solid, yield: 0.122g (62%), ethylacetate/petroleum ether = 1: 25, mp 110–111 °C. <sup>1</sup>H NMR (CDCl<sub>3</sub>, 400 MHz) δ (ppm) 11.45 (s, 1H), 8.04-7.45 (m, 8H), 6.61 (s, 1H), 1.81 (s, 2H), 1.58 (s, 6H), 1.04 (s, 9H); <sup>13</sup>C {<sup>1</sup>H} NMR (CDCl<sub>3</sub>, 100 MHz) δ (ppm) 191.2, 152.1, 145.8, 139.0, 136.5, 136.3, 133.7, 132.3, 131.7, 128.6, 127.6, 124.1, 120.9, 89.5, 59.0, 56.5, 32.2, 31.8, 30.7; HRMS (ESI-TOF) m/z: [M + H]<sup>+</sup> Calcd for C<sub>24</sub>H<sub>28</sub>ClN<sub>2</sub>O 395.1885; Found 395.1892.

**2-((1Z,3Z)-6-Chloro-3-((2,4,4-trimethylpentan-2-yl)imino)isoindolin-1-ylidene)-1-(4-chlorophenyl)ethan-1-one (6q):**

Light yellow solid, yield: 0.139g (65%), ethylacetate/petroleum ether = 1: 25, mp 130–132 °C. <sup>1</sup>H NMR (CDCl<sub>3</sub>, 400 MHz) δ (ppm) 11.43 (s, 1H), 7.98-7.45 (m, 7H), 6.54 (s, 1H), 1.80 (s, 2H), 1.57 (s, 6H), 1.03 (s, 9H); <sup>13</sup>C {<sup>1</sup>H} NMR (CDCl<sub>3</sub>, 100 MHz) δ (ppm) 189.7, 152.5, 145.5, 138.6, 137.3, 136.5, 136.1, 133.7, 131.8, 129.0, 128.9, 124.1, 121.0, 89.0, 59.1, 56.6, 32.2, 31.8, 30.7; HRMS (ESI-TOF) m/z: [M + H]<sup>+</sup> Calcd for C<sub>24</sub>H<sub>27</sub>Cl<sub>2</sub>N<sub>2</sub>O 429.1495; Found 429.1499.

## 5. Copies of $^1\text{H}$ and $^{13}\text{C}$ NMR Spectrum

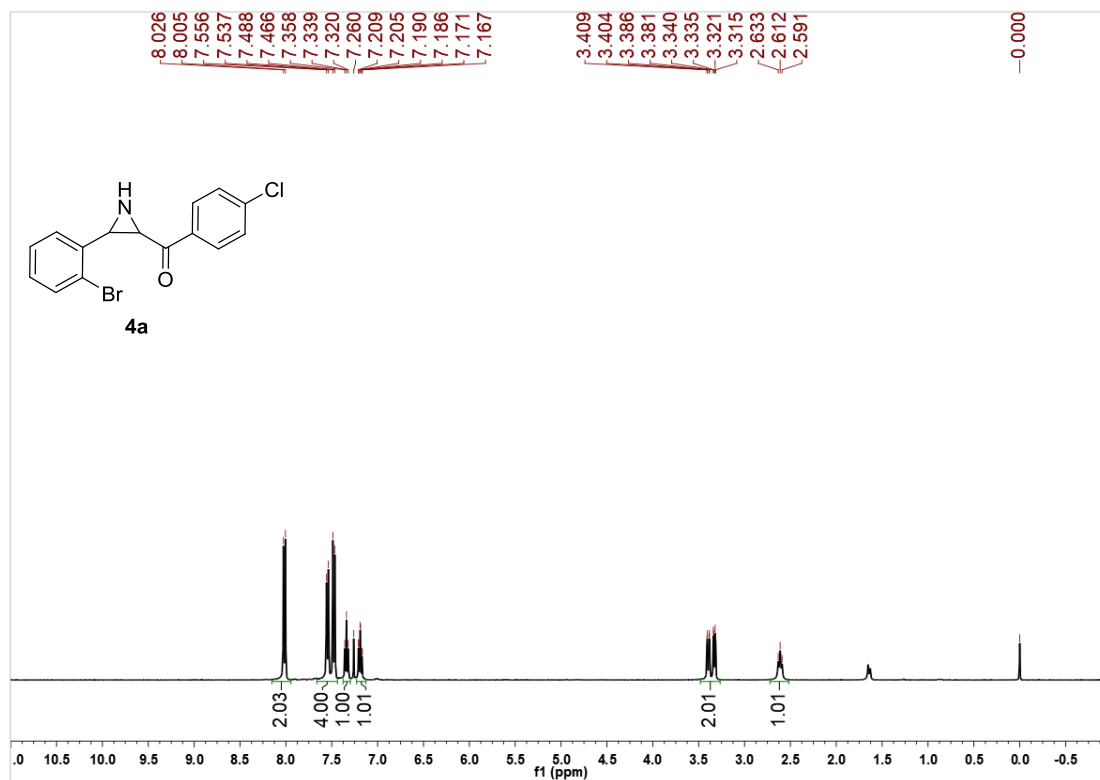

$^1\text{H}$  NMR (400 MHz),  $\text{CDCl}_3$

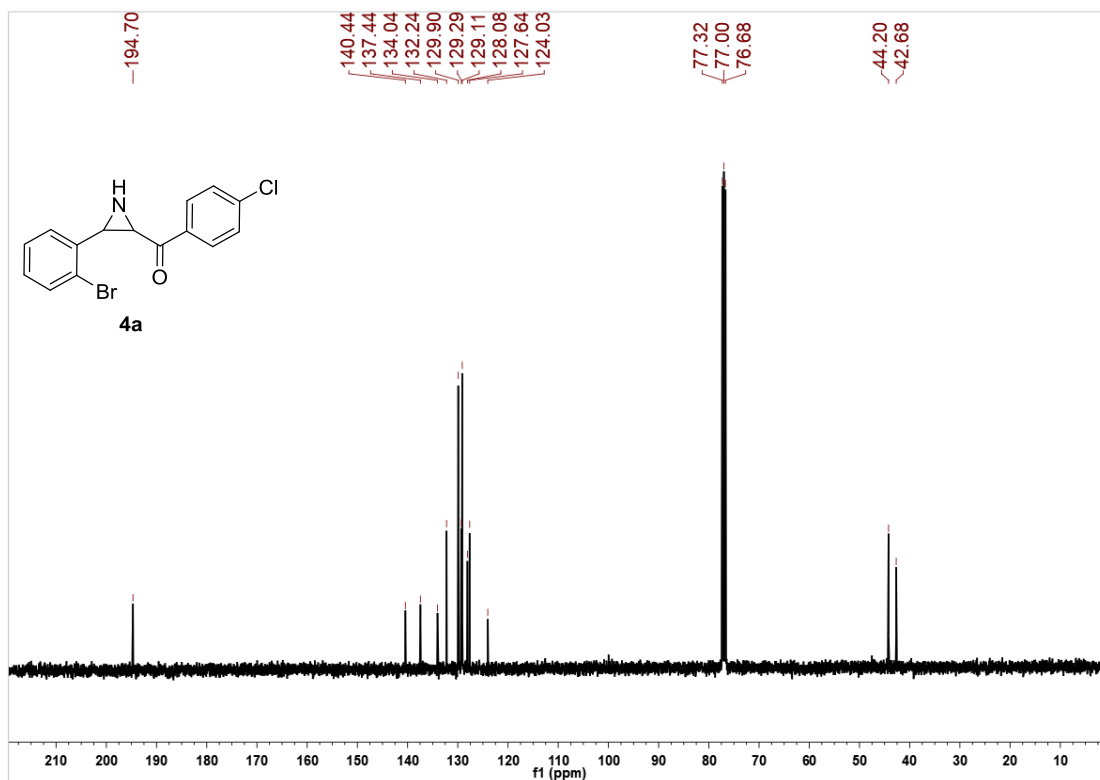

$^{13}\text{C}$  NMR (100 MHz),  $\text{CDCl}_3$

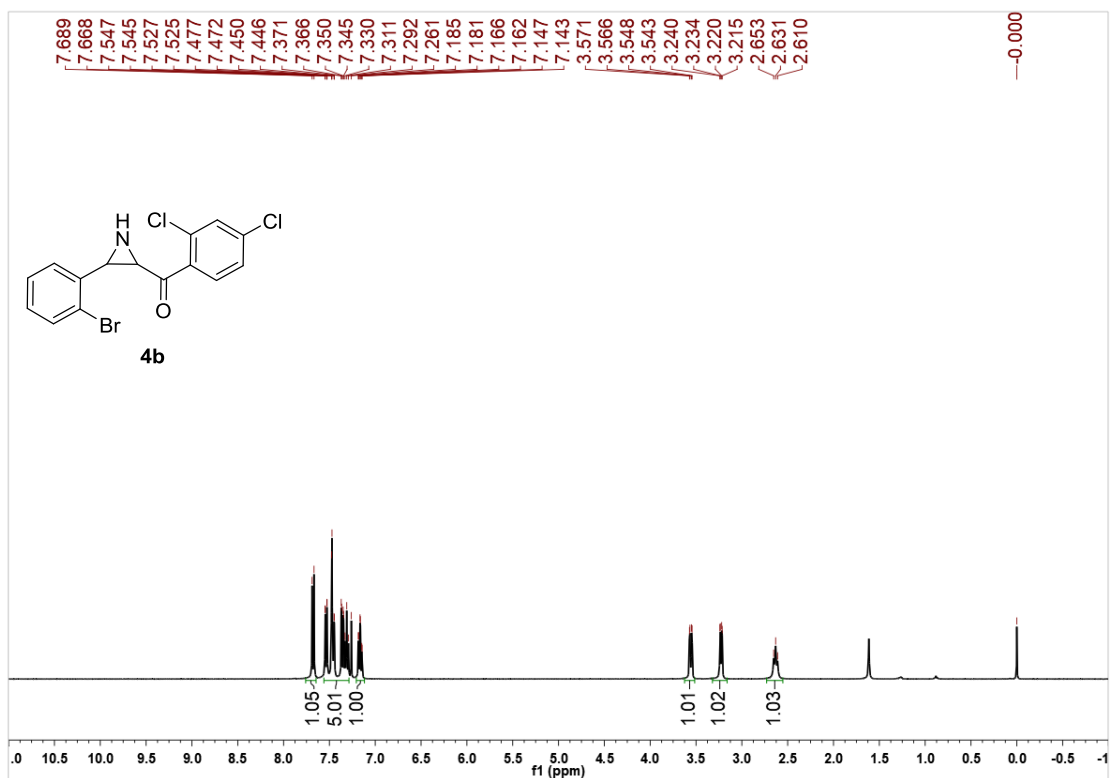

<sup>1</sup>H NMR (400 MHz), CDCl<sub>3</sub>

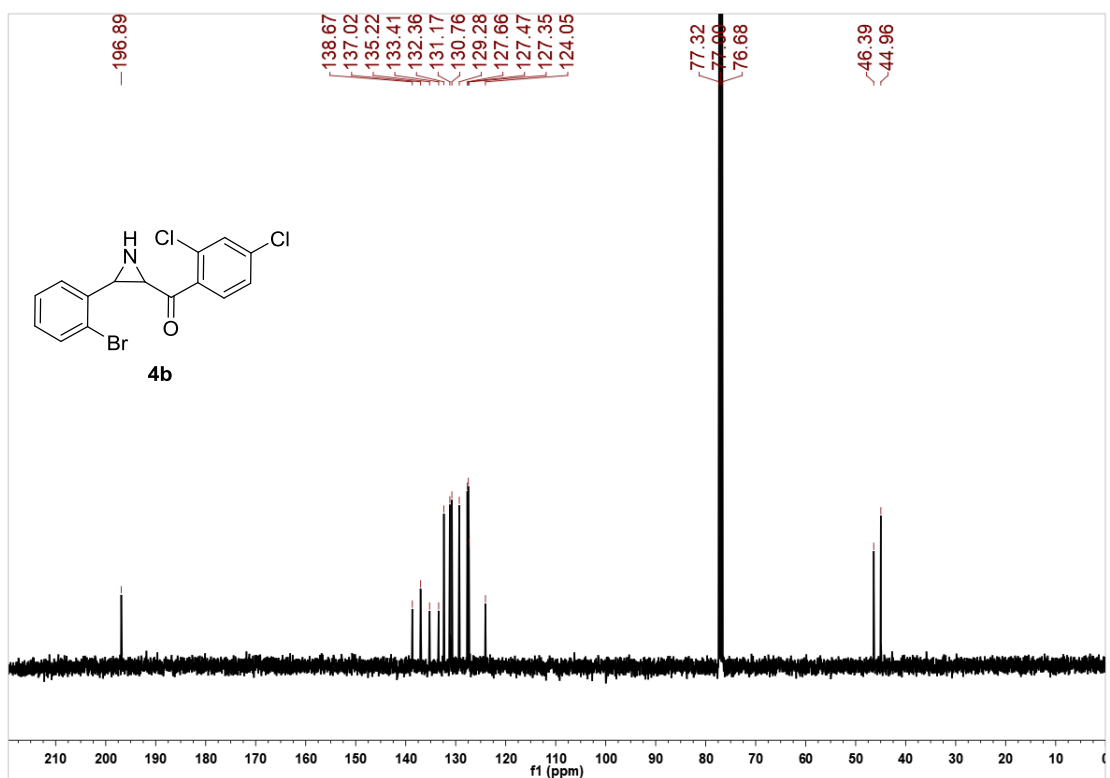

<sup>13</sup>C NMR (100 MHz), CDCl<sub>3</sub>

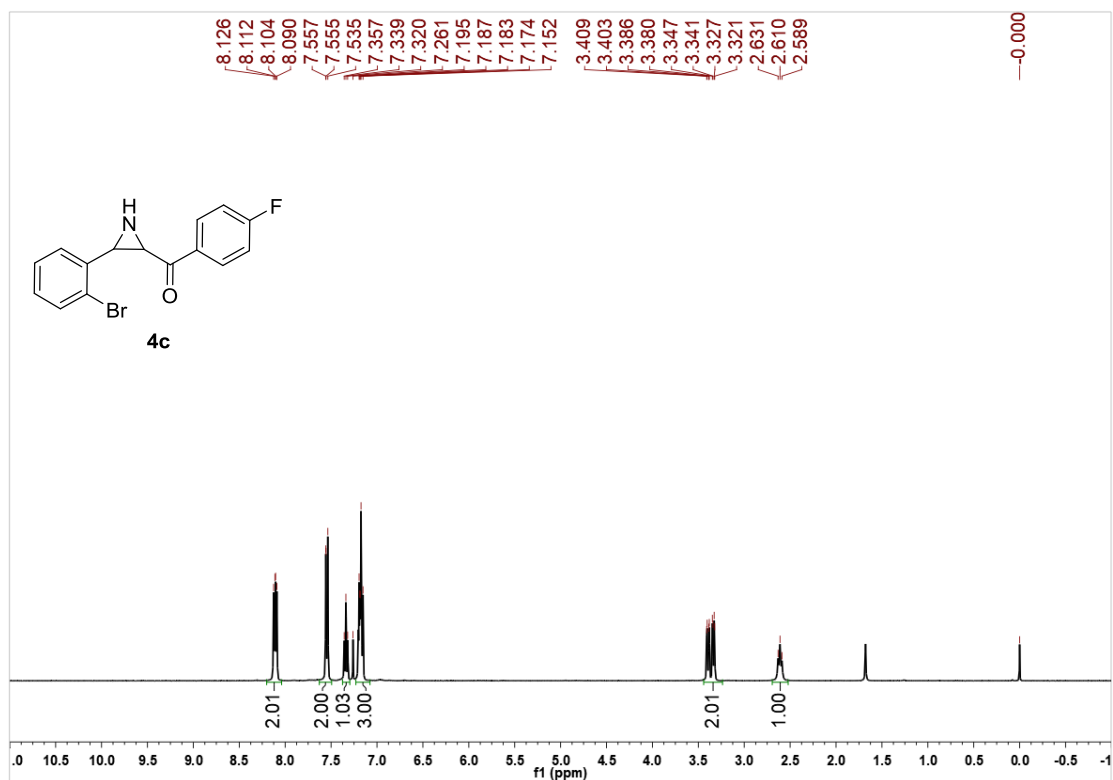

<sup>1</sup>H NMR (400 MHz), CDCl<sub>3</sub>

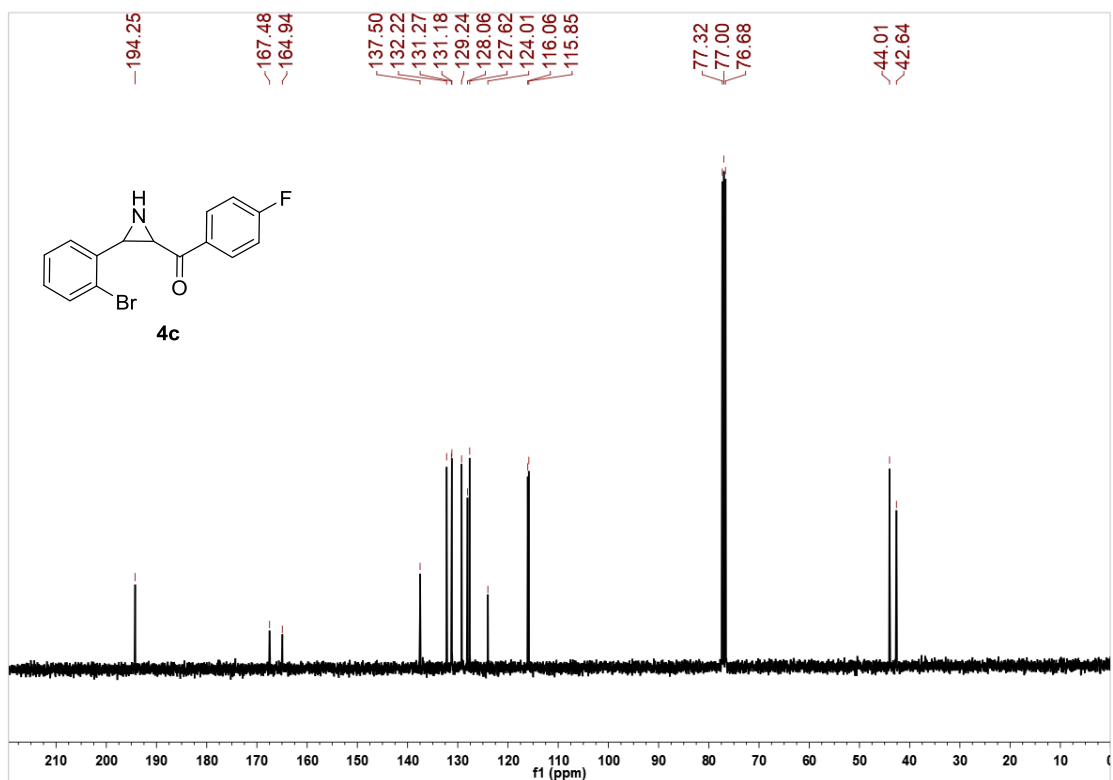

<sup>13</sup>C NMR (100 MHz), CDCl<sub>3</sub>

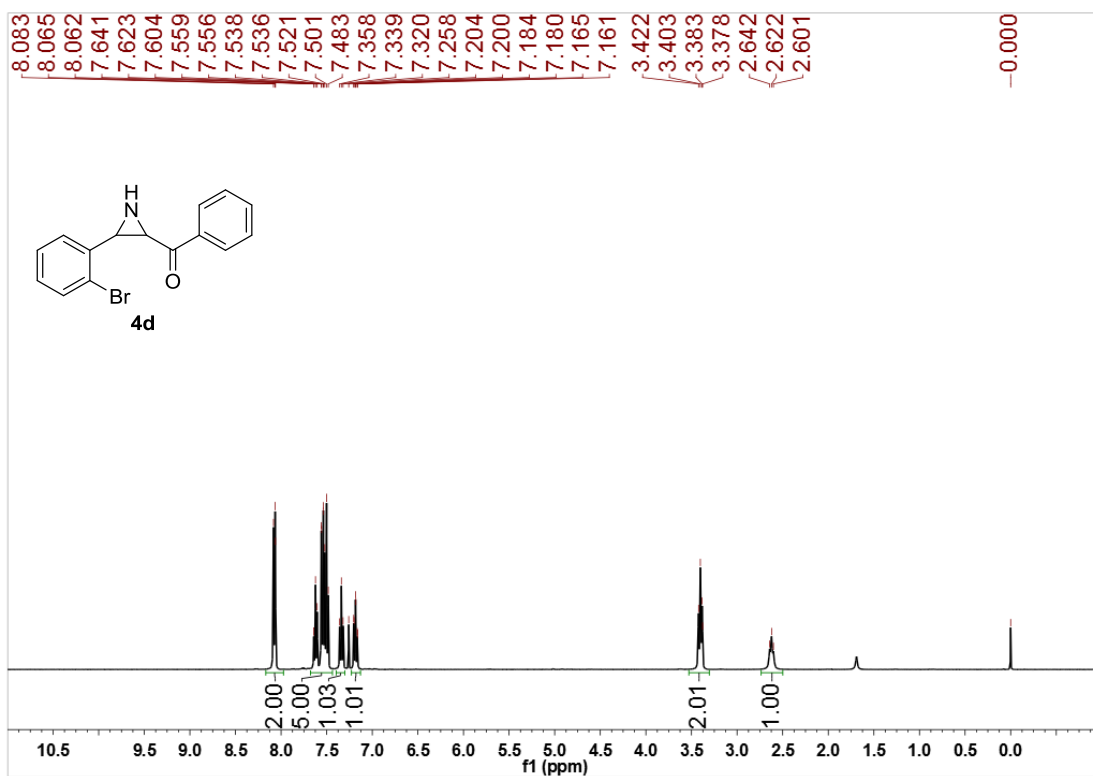

<sup>1</sup>H NMR (400 MHz), CDCl<sub>3</sub>

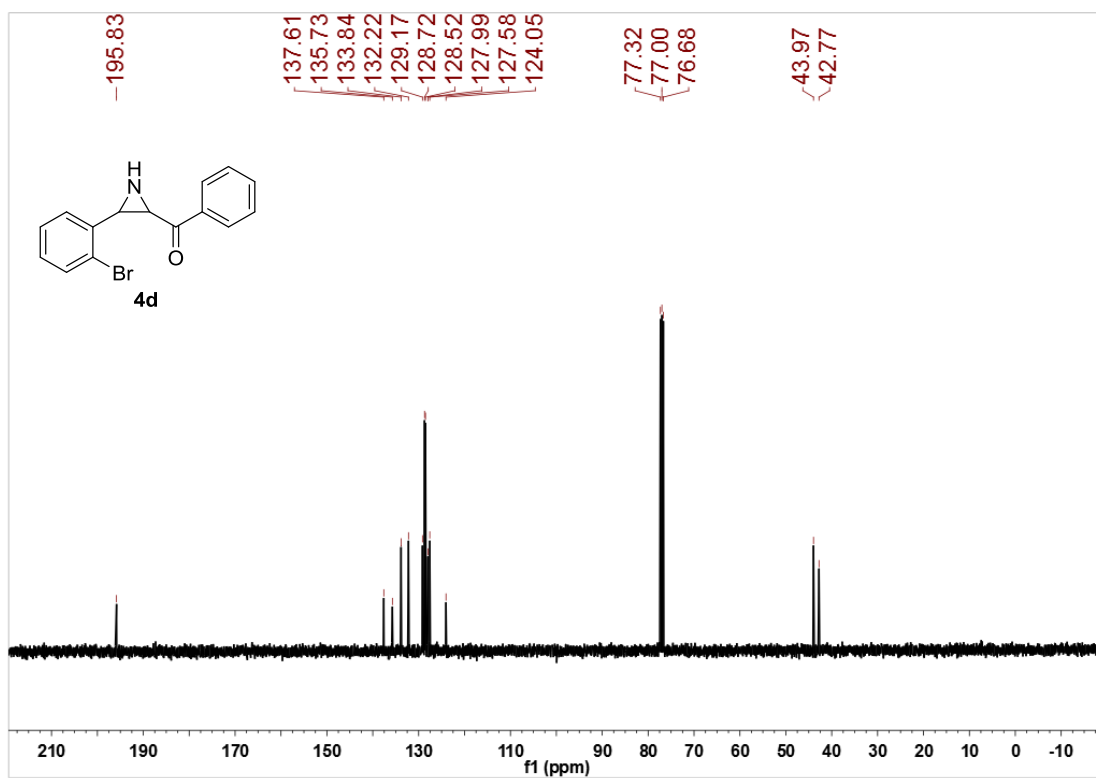

<sup>13</sup>C NMR (100 MHz), CDCl<sub>3</sub>



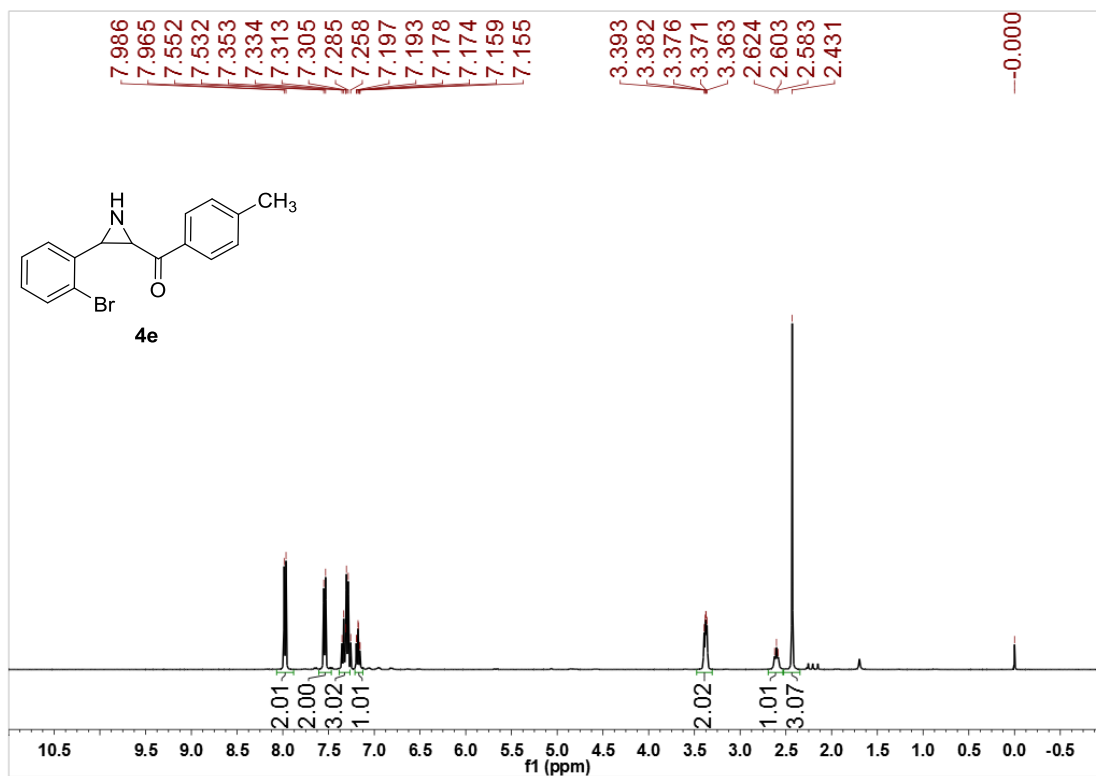

<sup>1</sup>H NMR (400 MHz), CDCl<sub>3</sub>

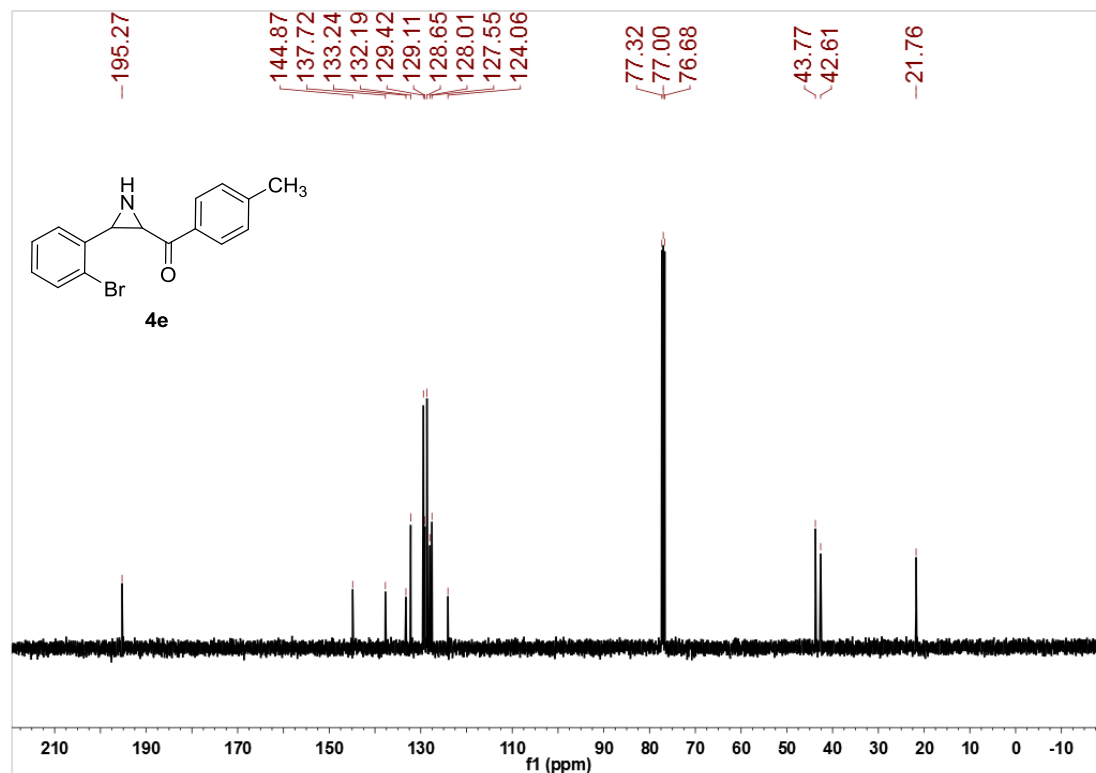

<sup>13</sup>C NMR (100 MHz), CDCl<sub>3</sub>

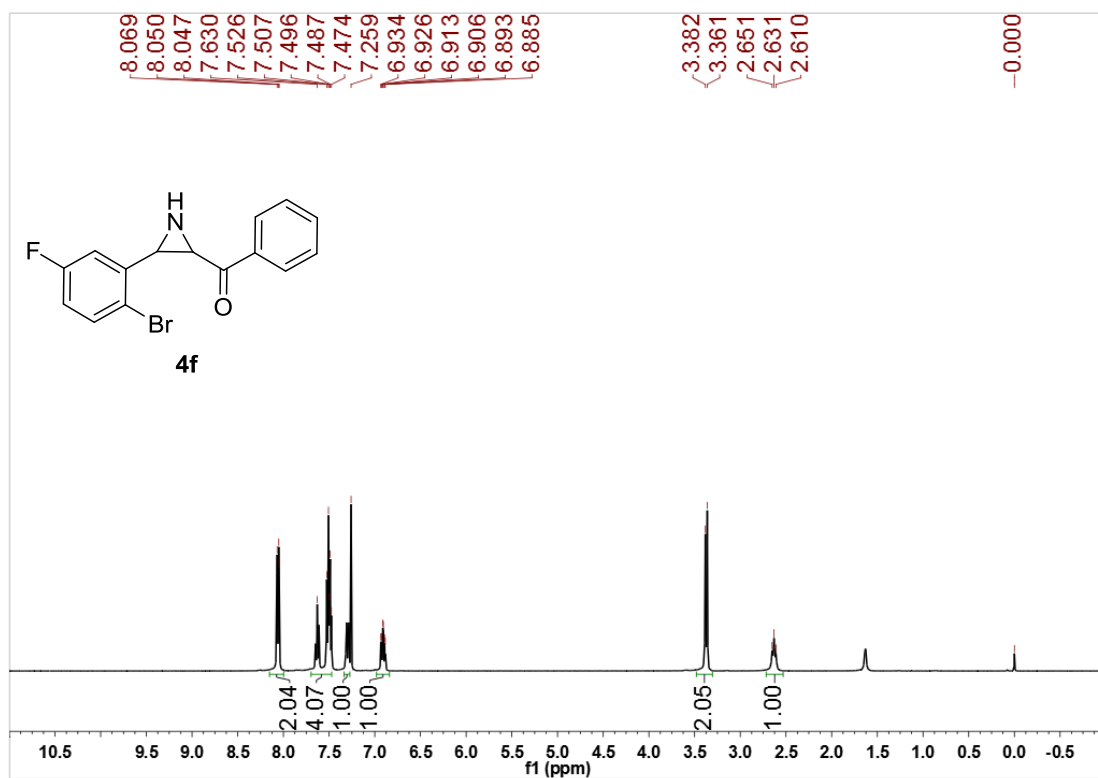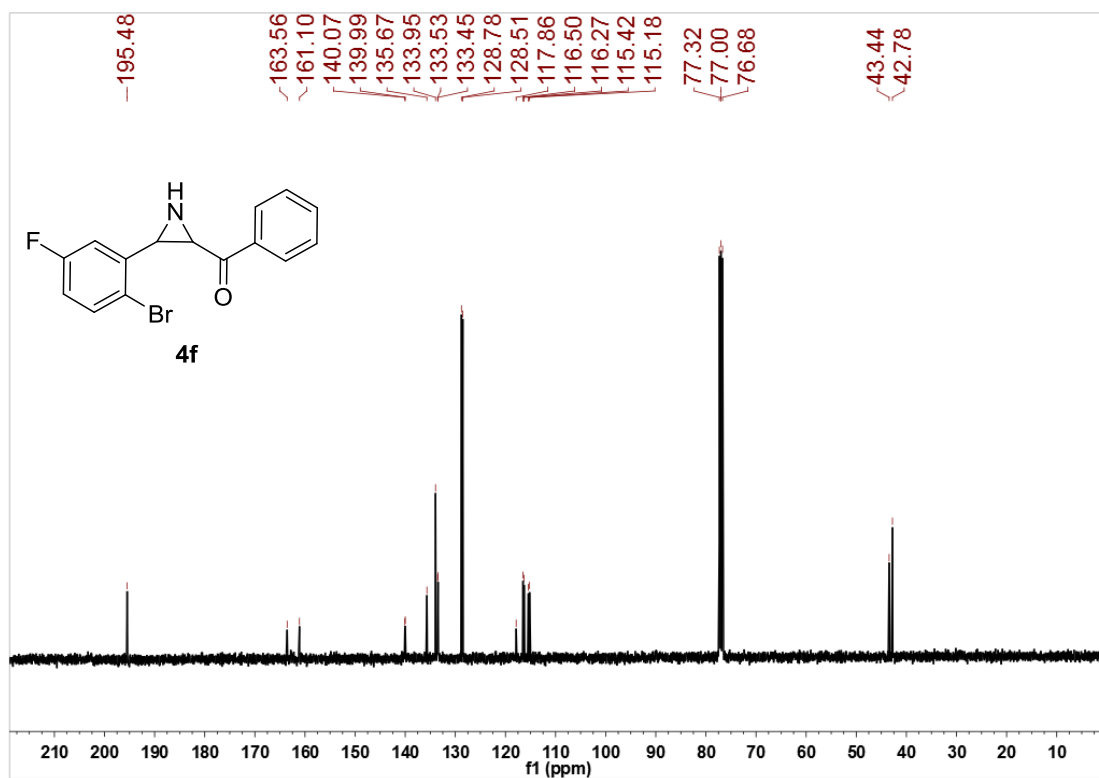

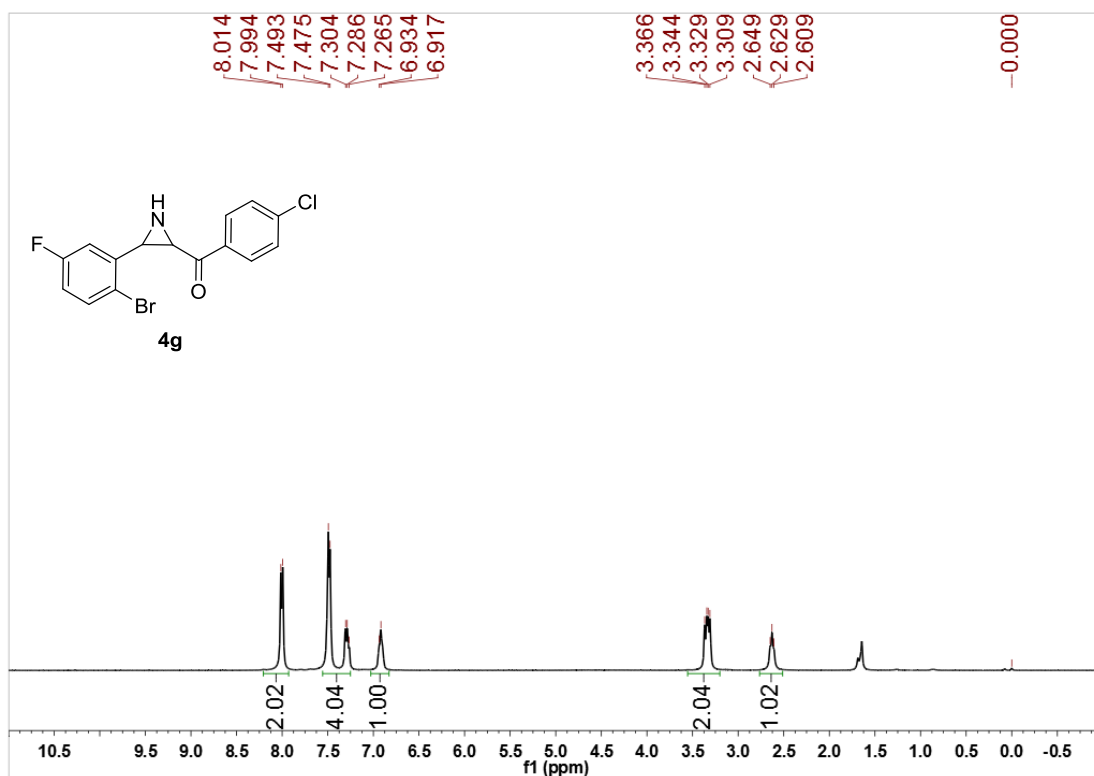

<sup>1</sup>H NMR (400 MHz), CDCl<sub>3</sub>

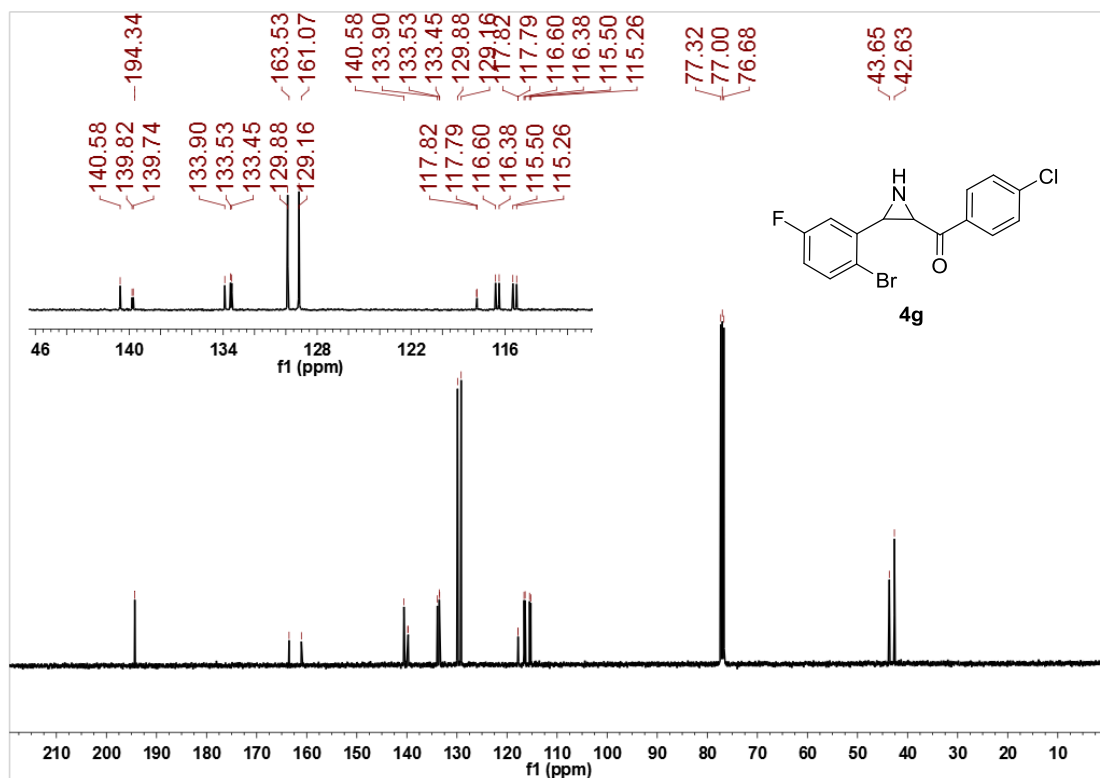

<sup>13</sup>C NMR (100 MHz), CDCl<sub>3</sub>

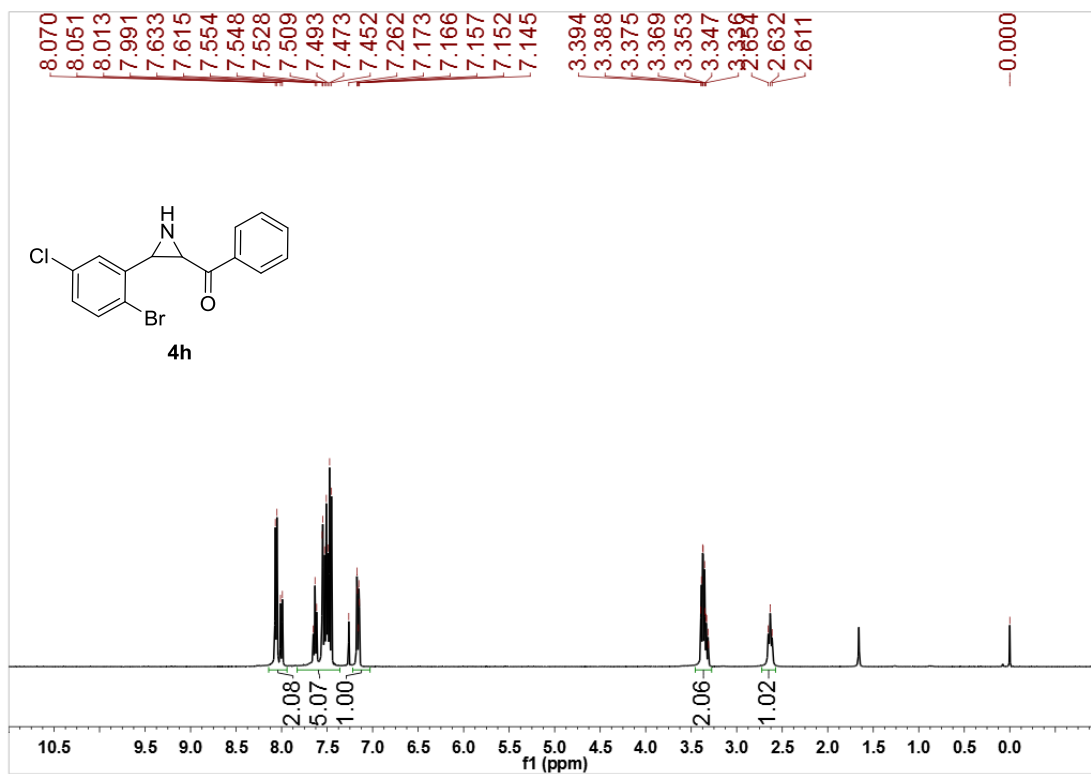

<sup>1</sup>H NMR (400 MHz), CDCl<sub>3</sub>

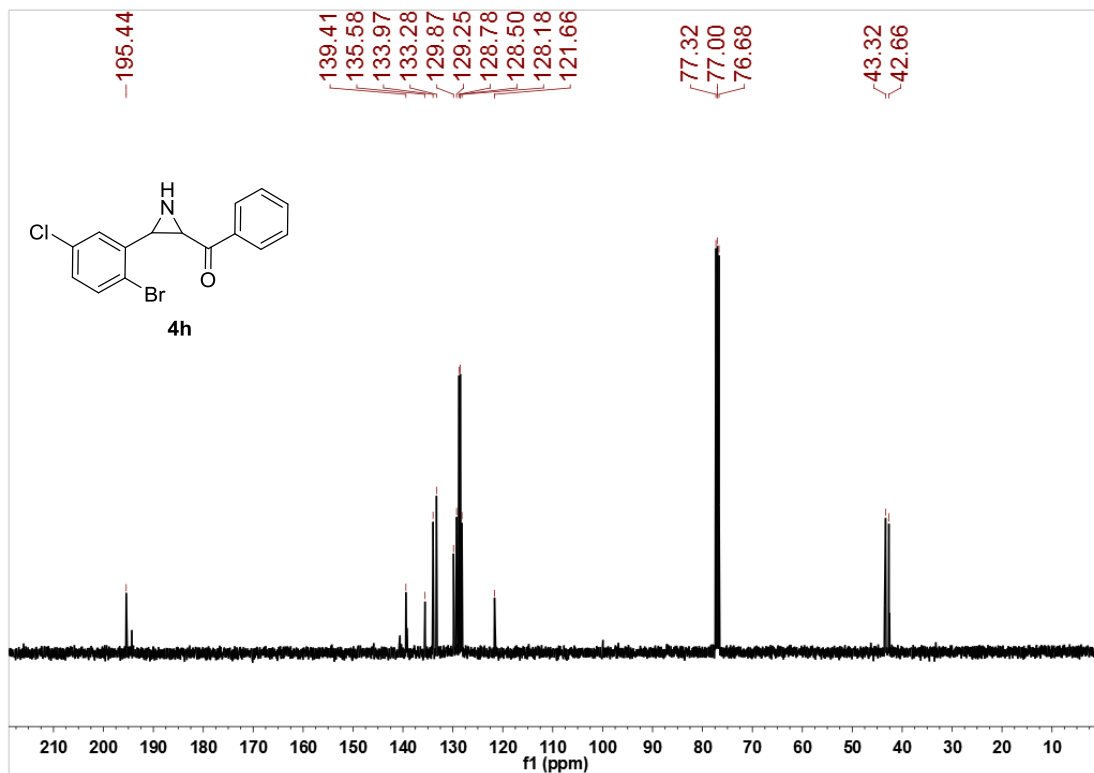

<sup>13</sup>C NMR (100 MHz), CDCl<sub>3</sub>

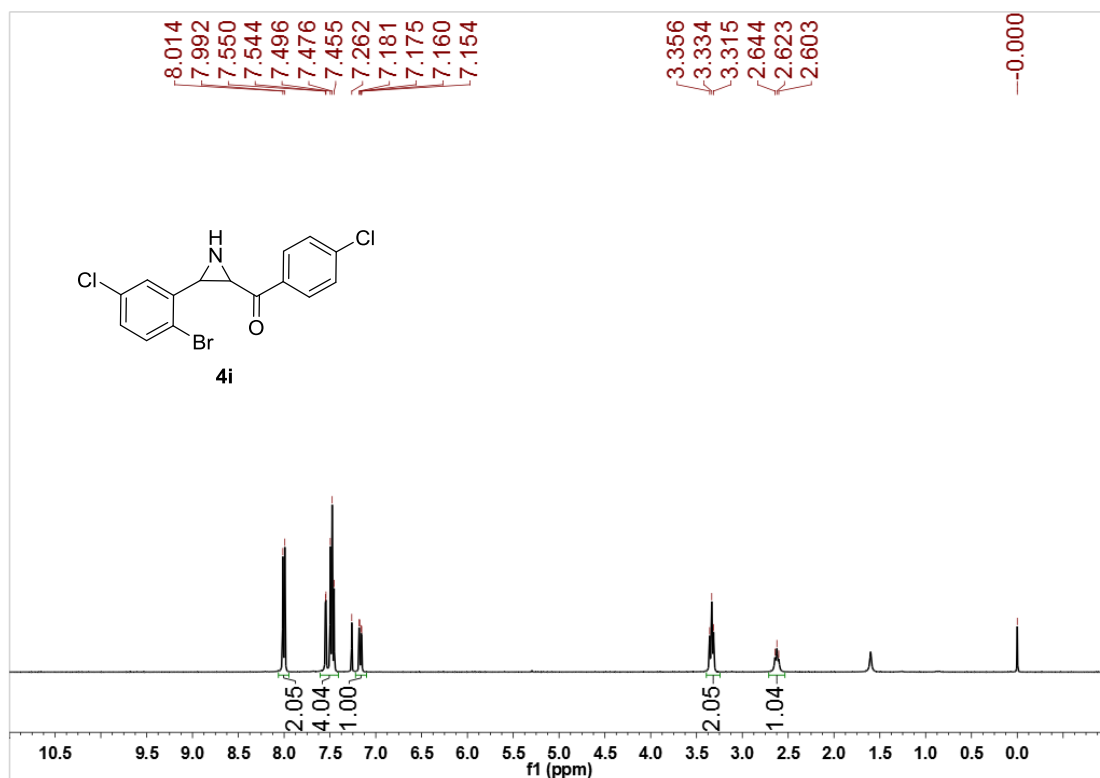

<sup>1</sup>H NMR (400 MHz), CDCl<sub>3</sub>

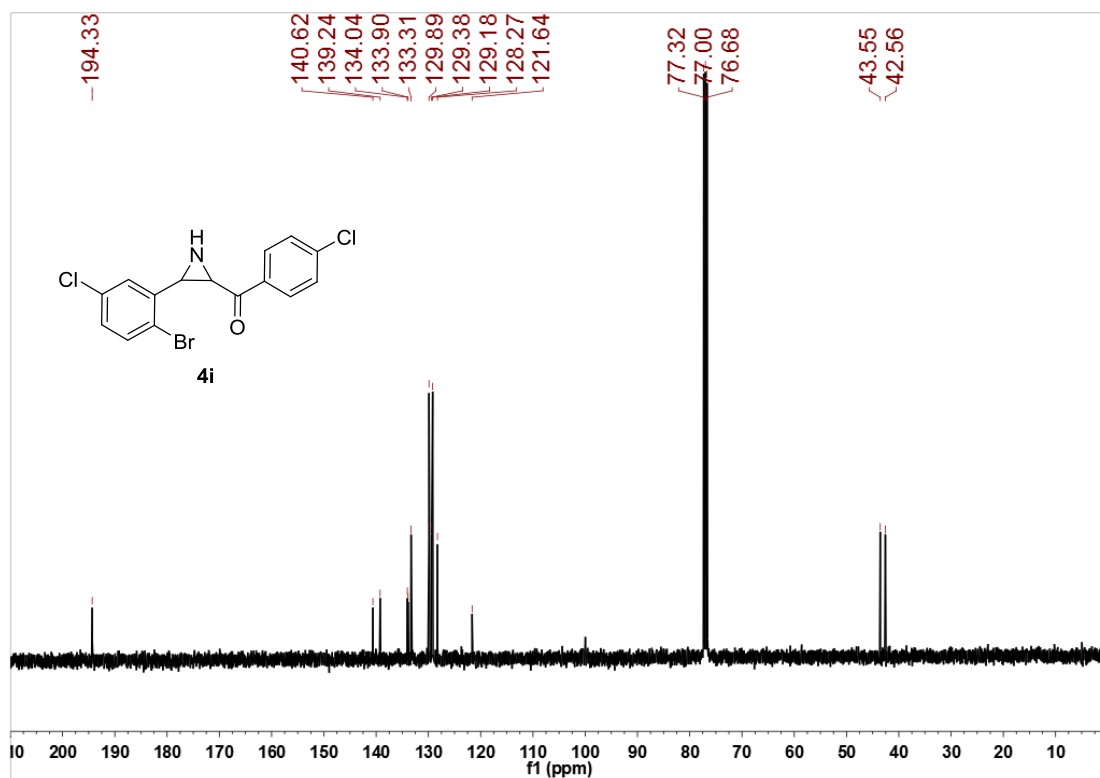

<sup>13</sup>C NMR (100 MHz), CDCl<sub>3</sub>

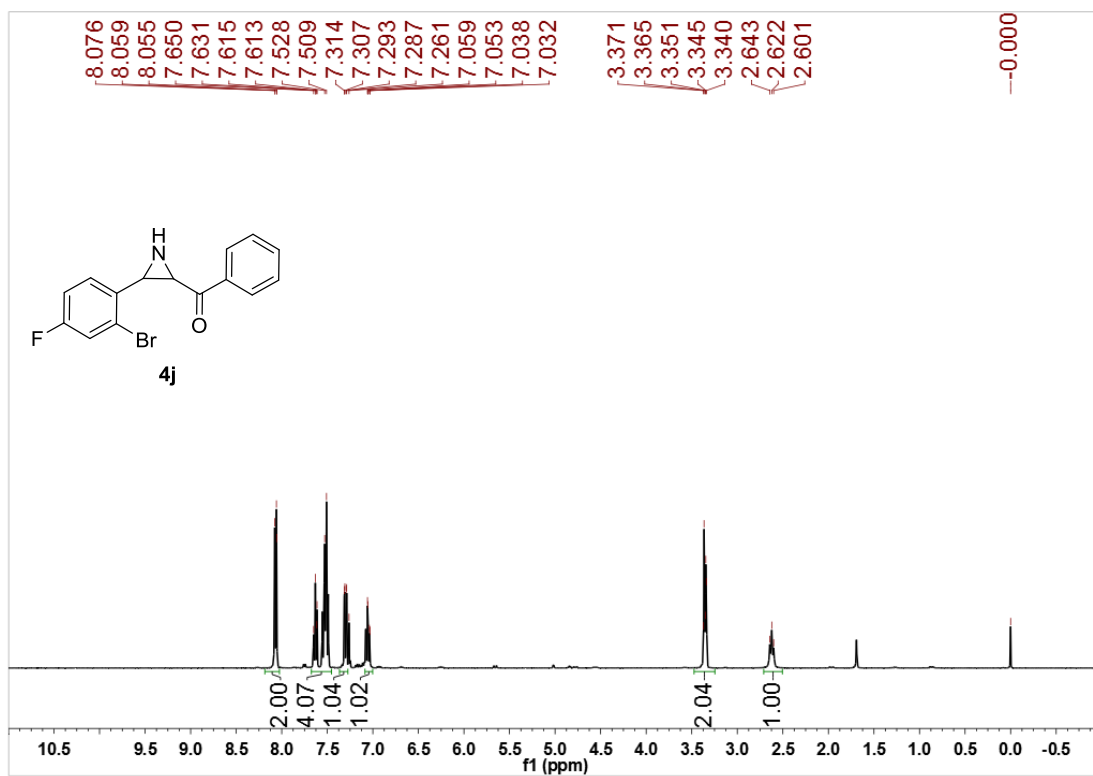

<sup>1</sup>H NMR (400 MHz), CDCl<sub>3</sub>

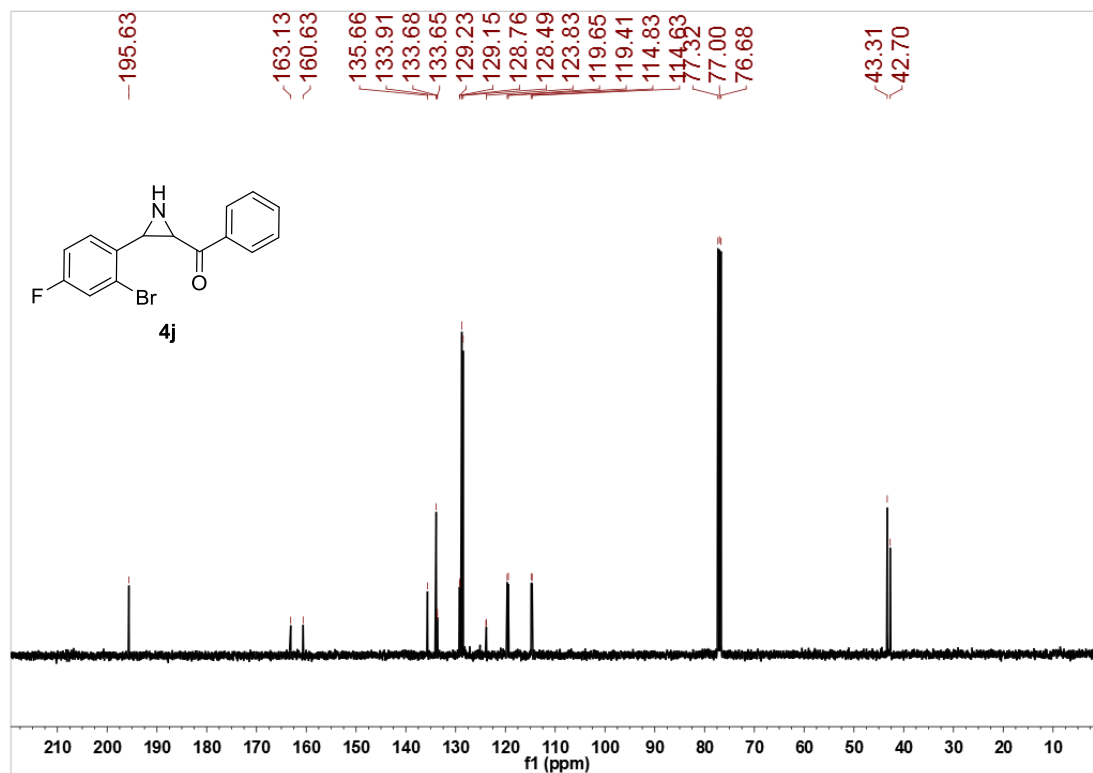

<sup>13</sup>C NMR (100 MHz), CDCl<sub>3</sub>

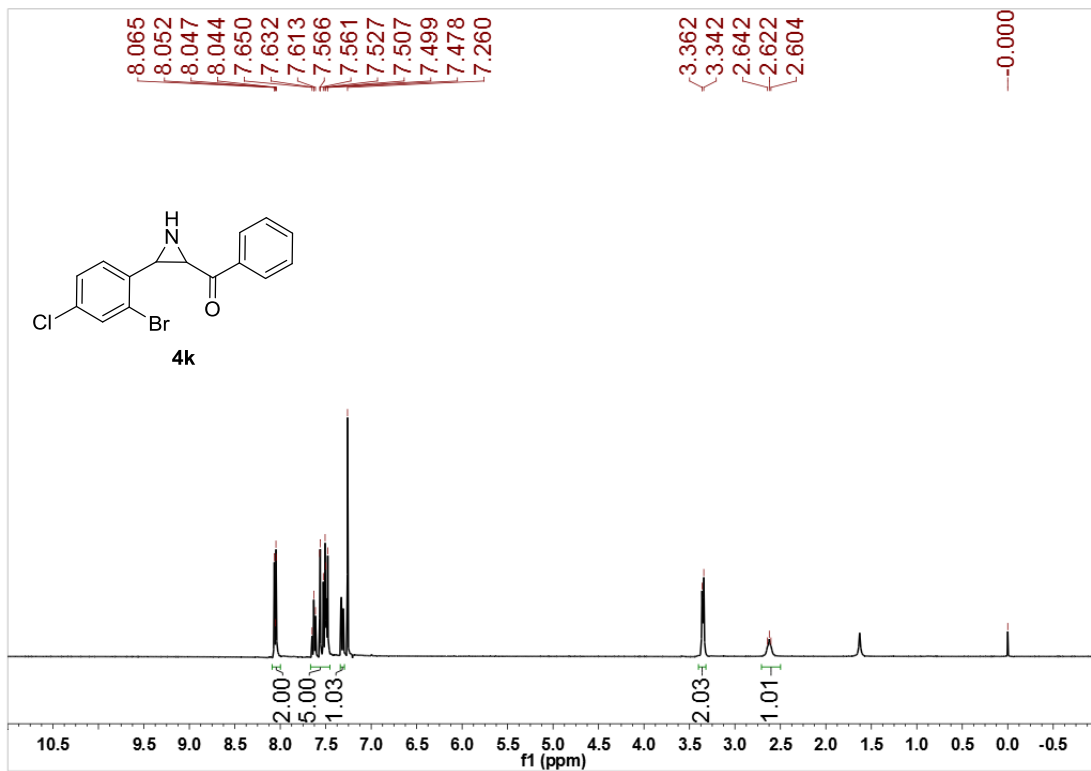

<sup>1</sup>H NMR (400 MHz), CDCl<sub>3</sub>

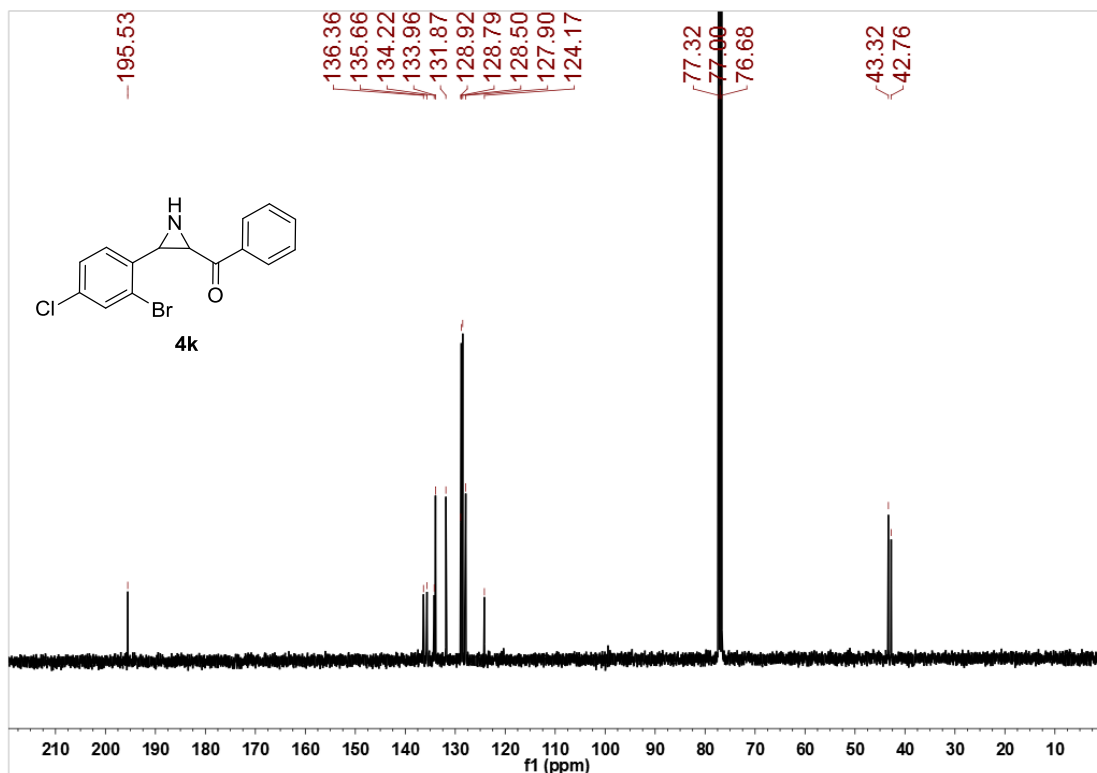

<sup>13</sup>C NMR (100 MHz), CDCl<sub>3</sub>

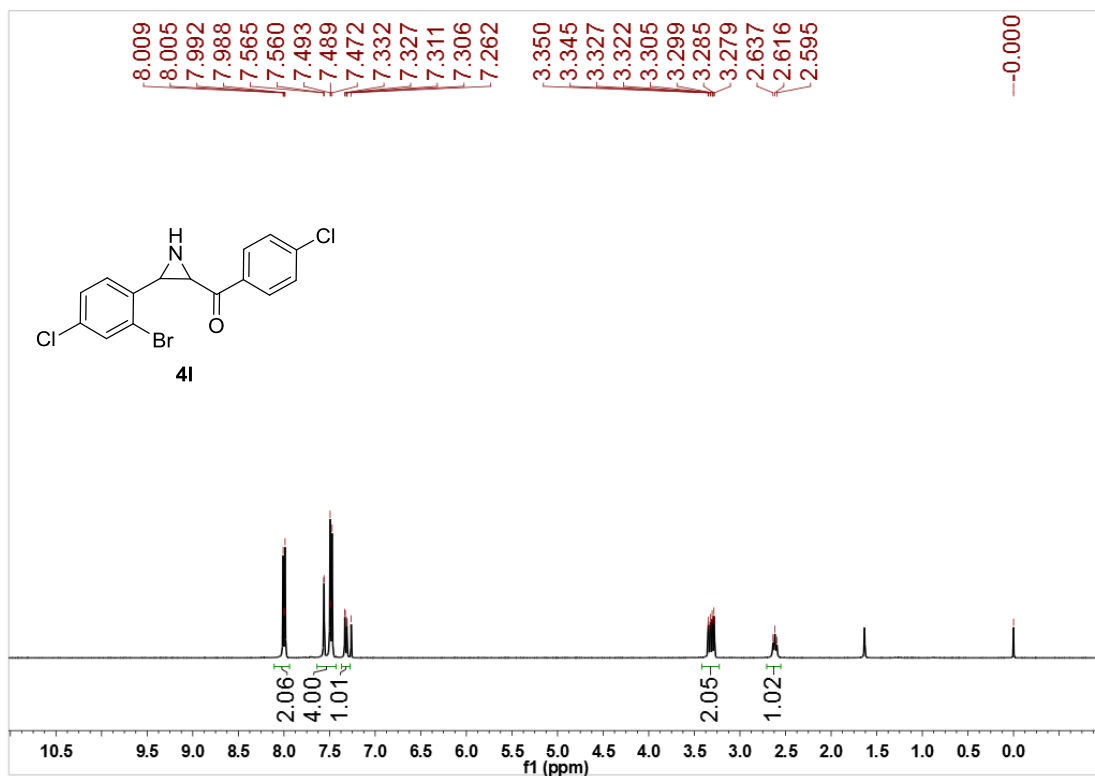

<sup>1</sup>H NMR (400 MHz), CDCl<sub>3</sub>

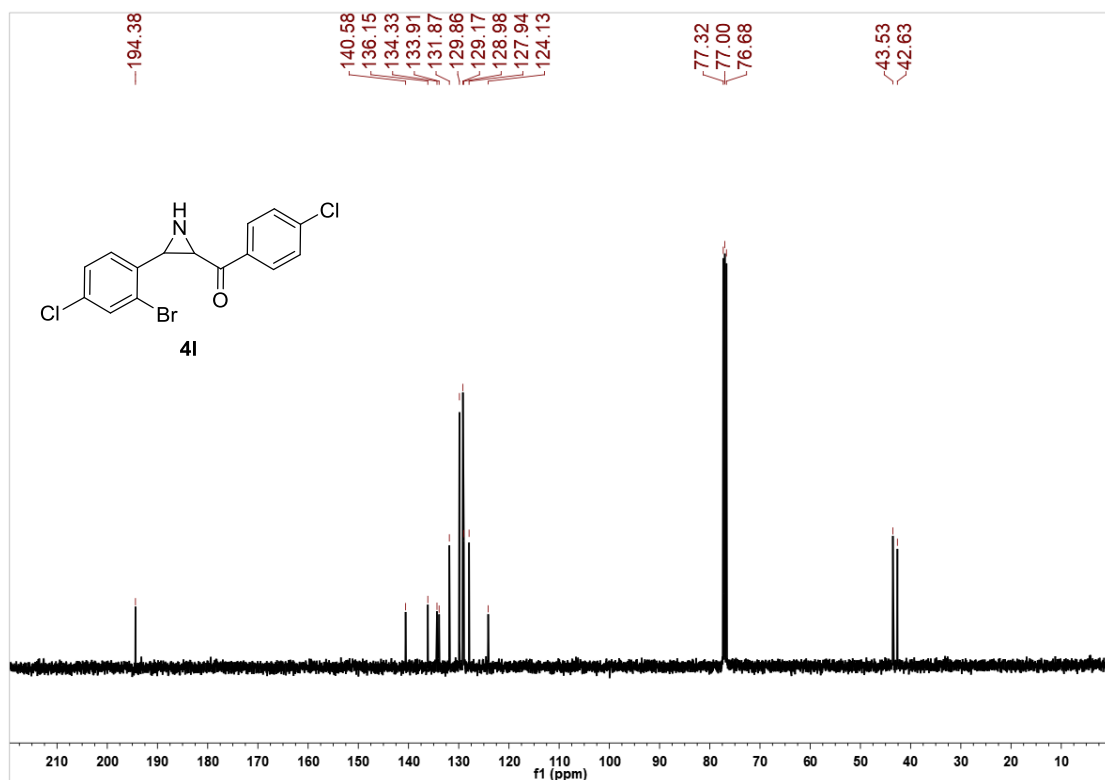

<sup>13</sup>C NMR (100 MHz), CDCl<sub>3</sub>



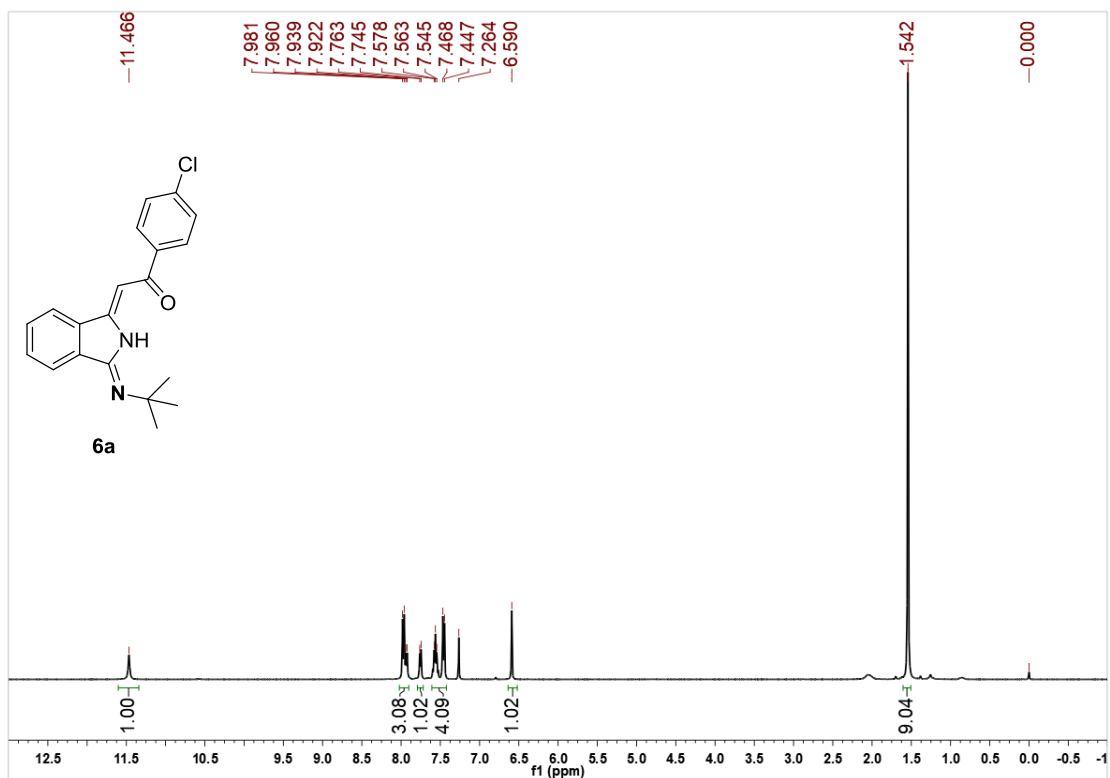

$^1\text{H}$  NMR (400 MHz),  $\text{CDCl}_3$

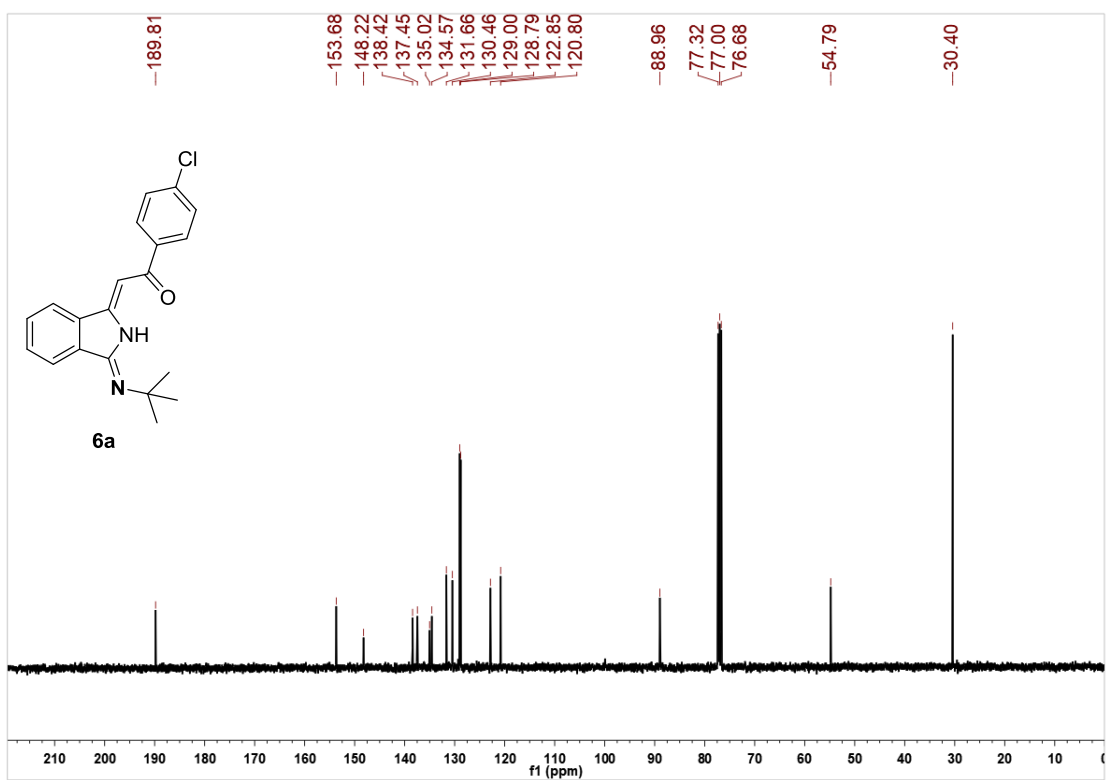

$^{13}\text{C}$  NMR (100 MHz),  $\text{CDCl}_3$

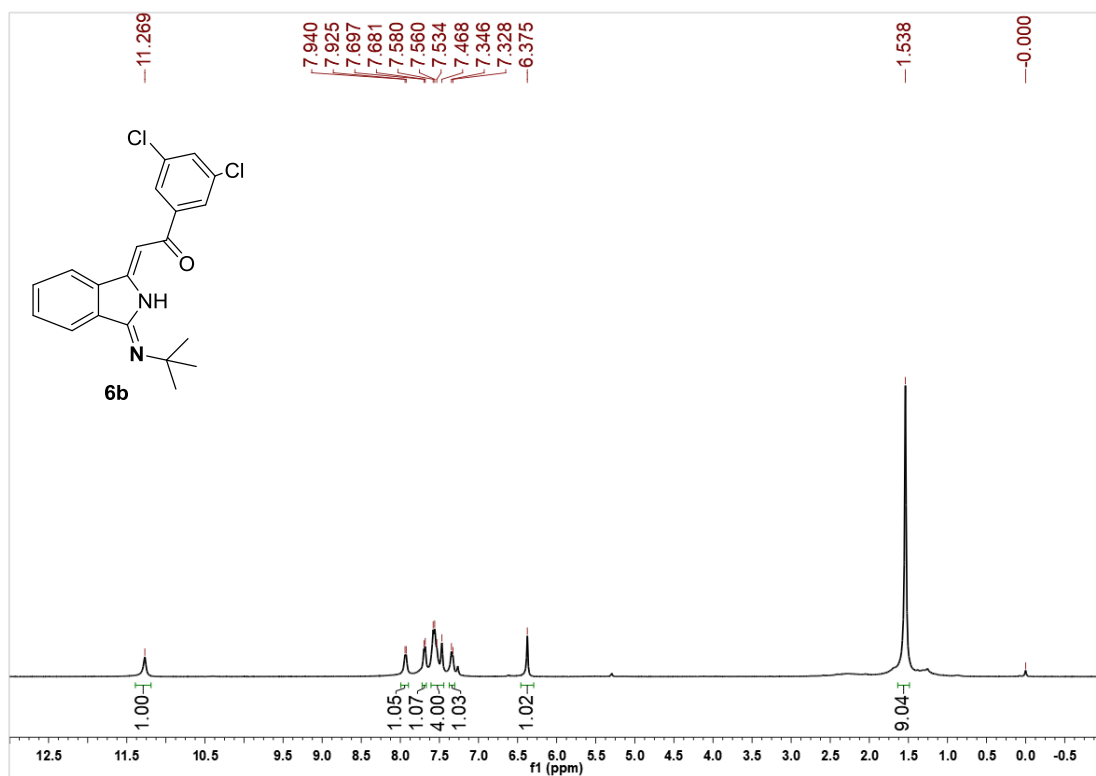

$^1\text{H NMR}$  (400 MHz),  $\text{CDCl}_3$

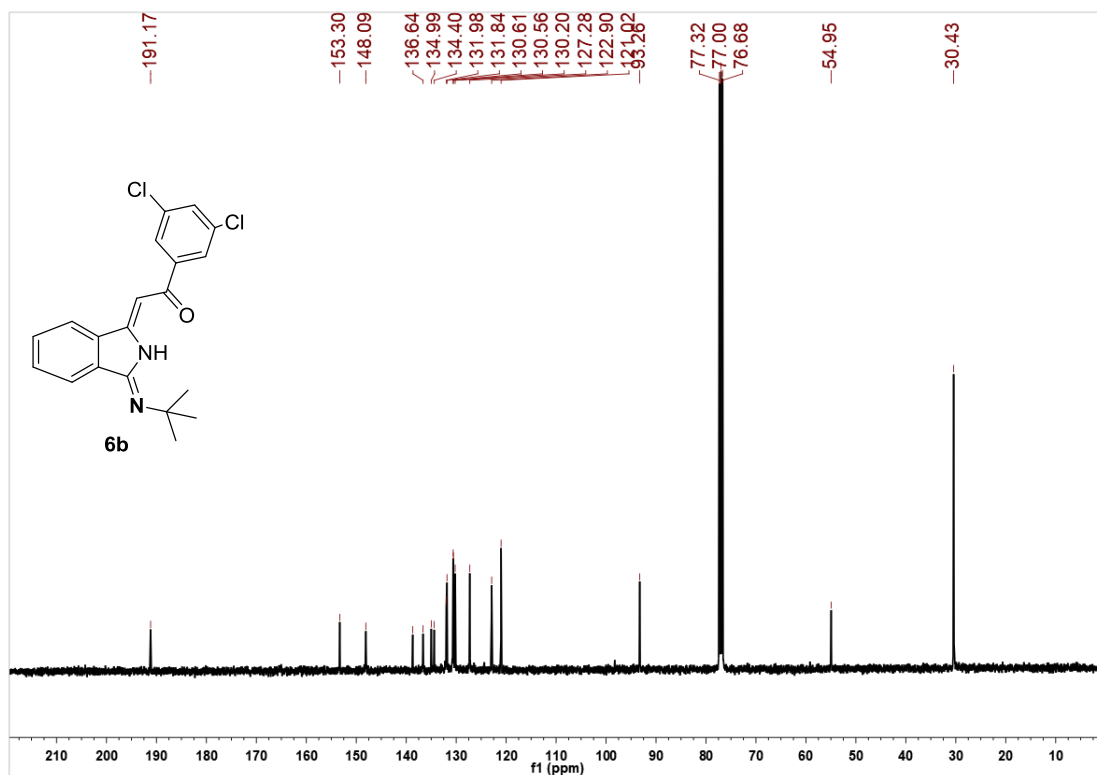

$^{13}\text{C NMR}$  (100 MHz),  $\text{CDCl}_3$

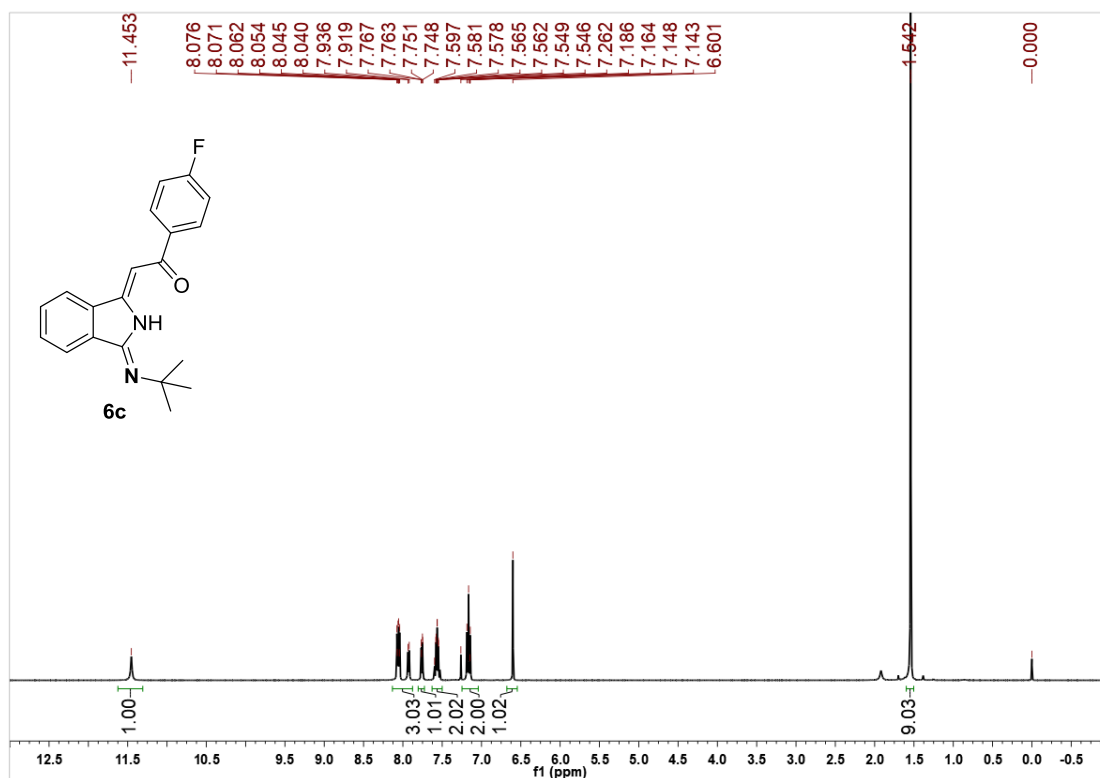

$^1\text{H}$  NMR (400 MHz),  $\text{CDCl}_3$

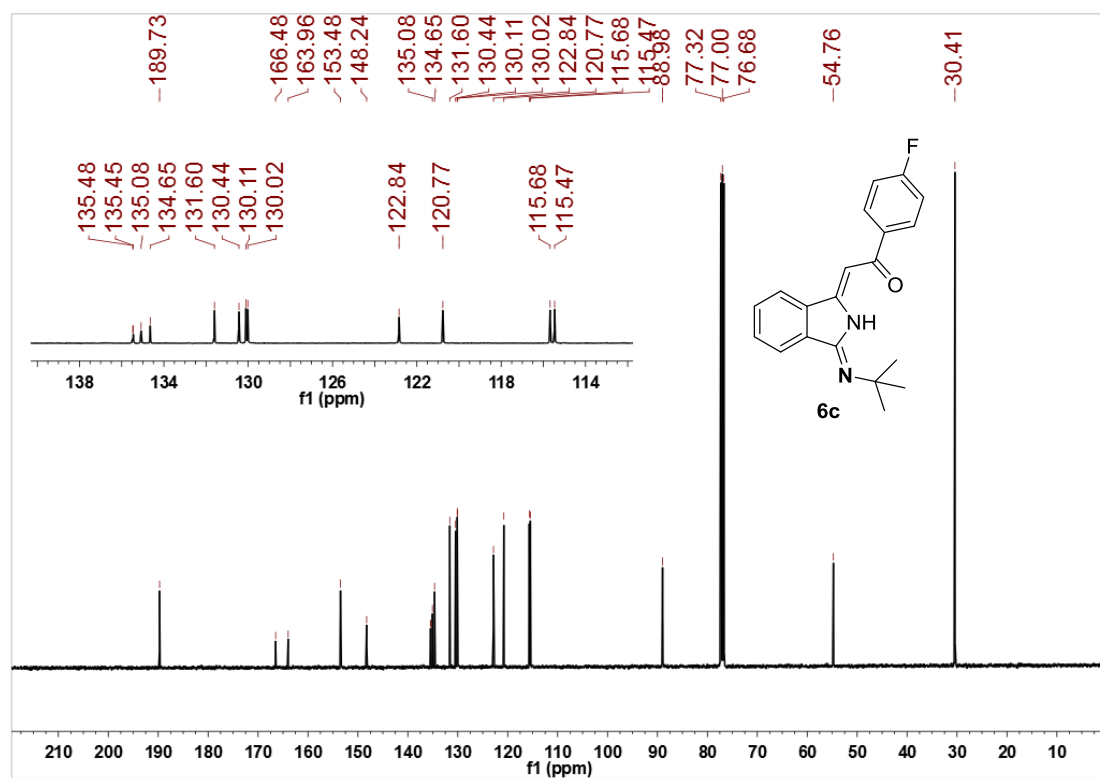

$^{13}\text{C}$  NMR (100 MHz),  $\text{CDCl}_3$

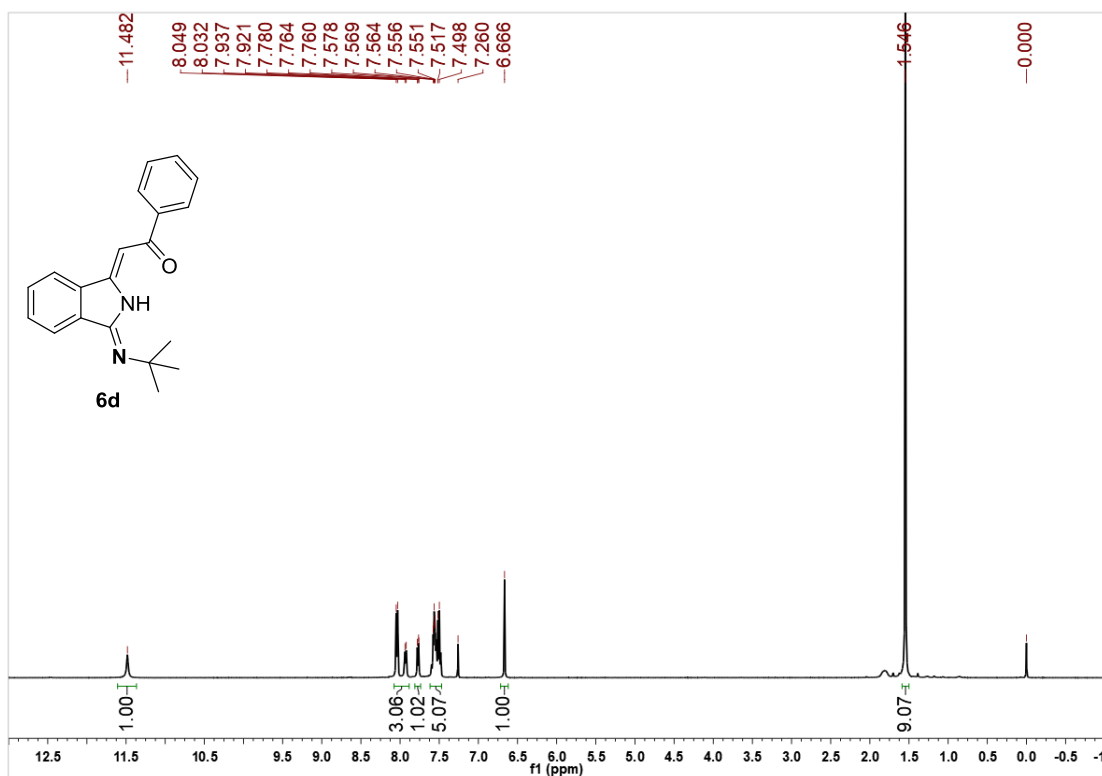

$^1\text{H NMR}$  (400 MHz),  $\text{CDCl}_3$

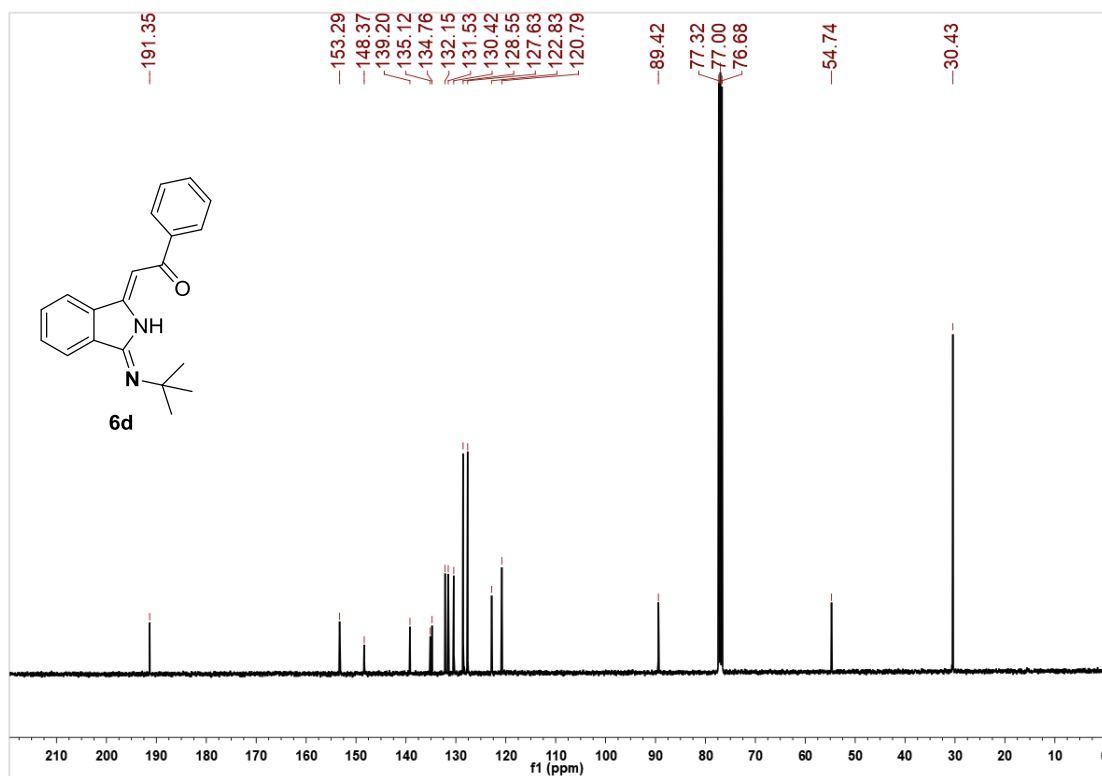

$^{13}\text{C NMR}$  (100 MHz),  $\text{CDCl}_3$

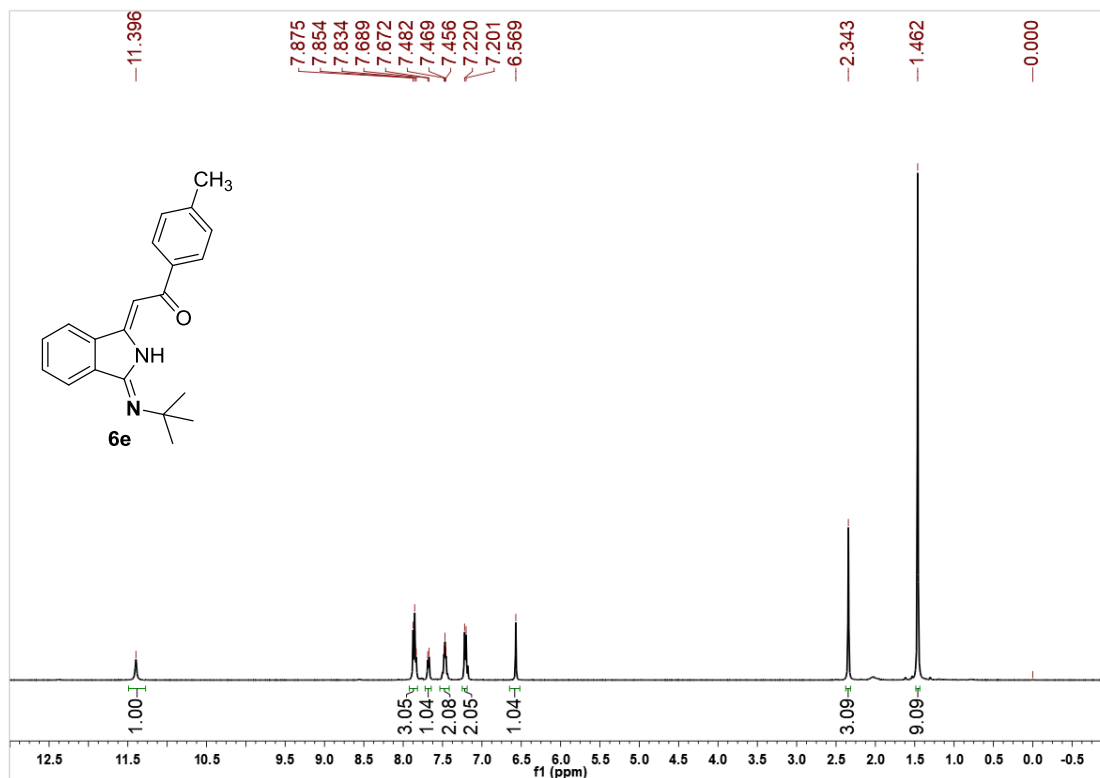

$^1\text{H}$  NMR (400 MHz),  $\text{CDCl}_3$

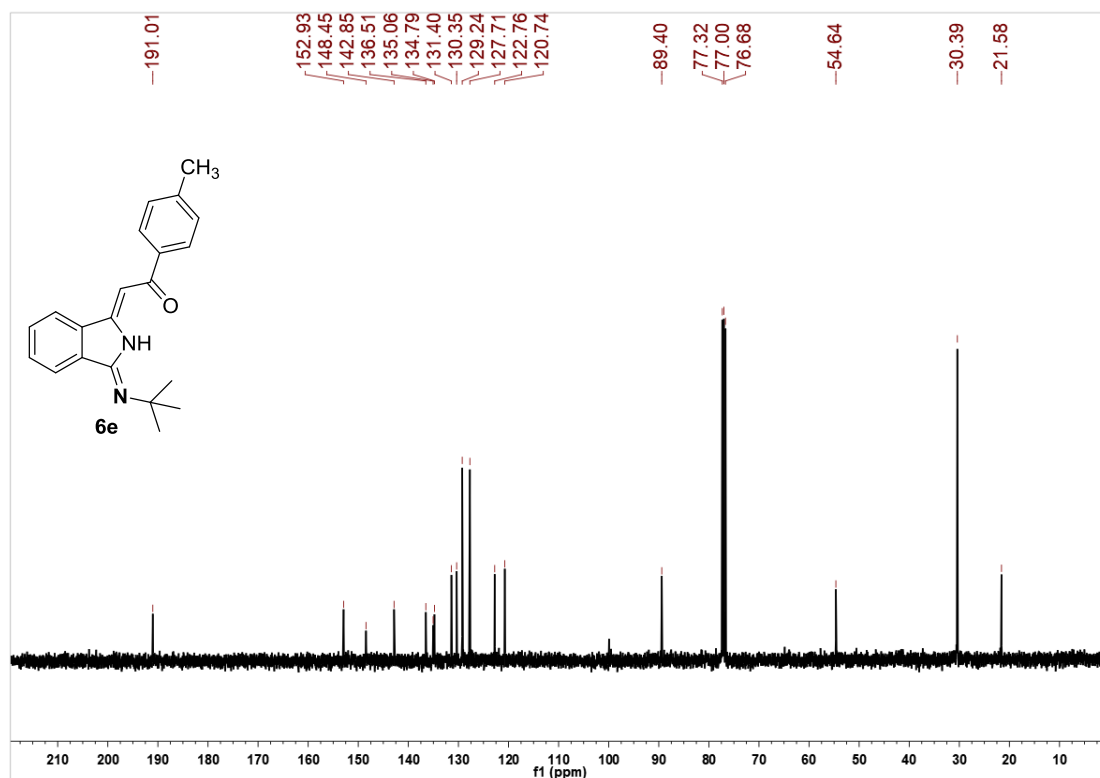

$^{13}\text{C}$  NMR (100 MHz),  $\text{CDCl}_3$

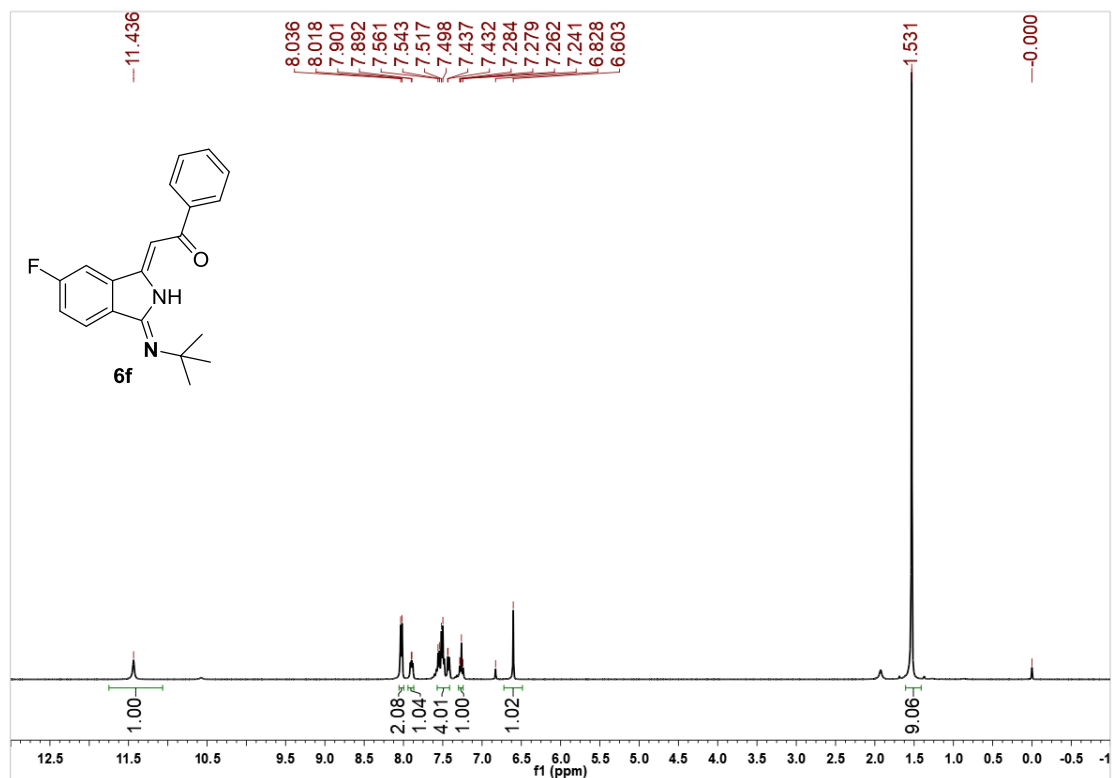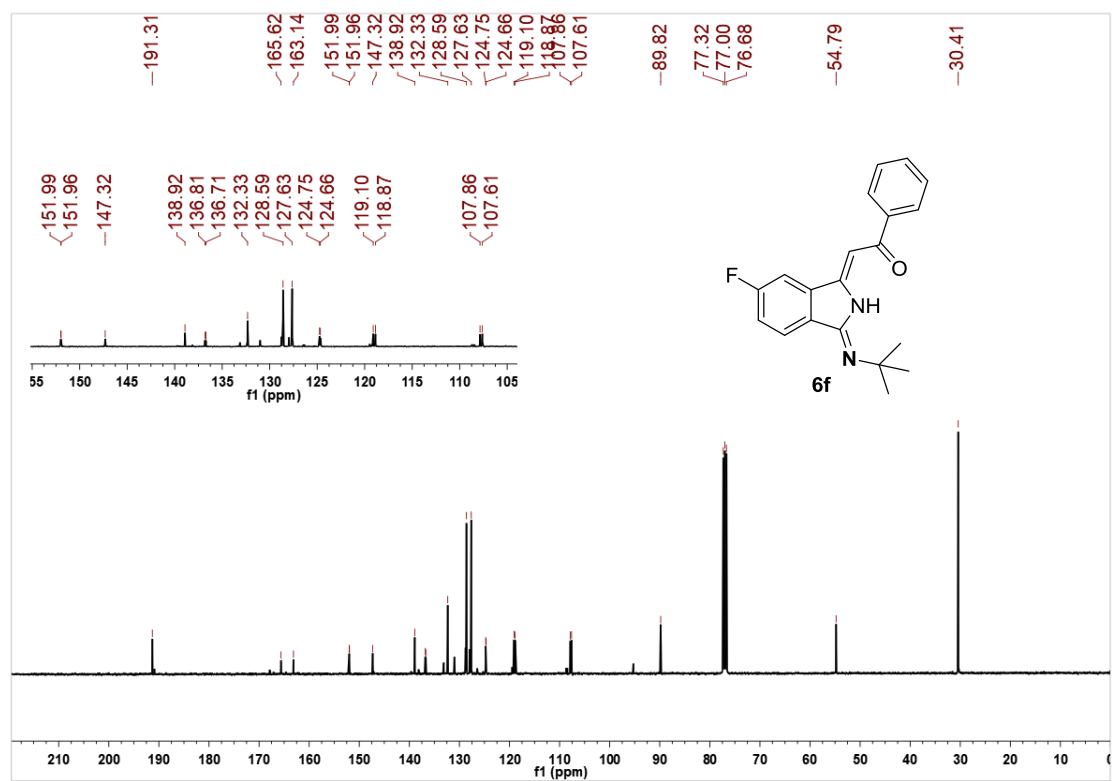

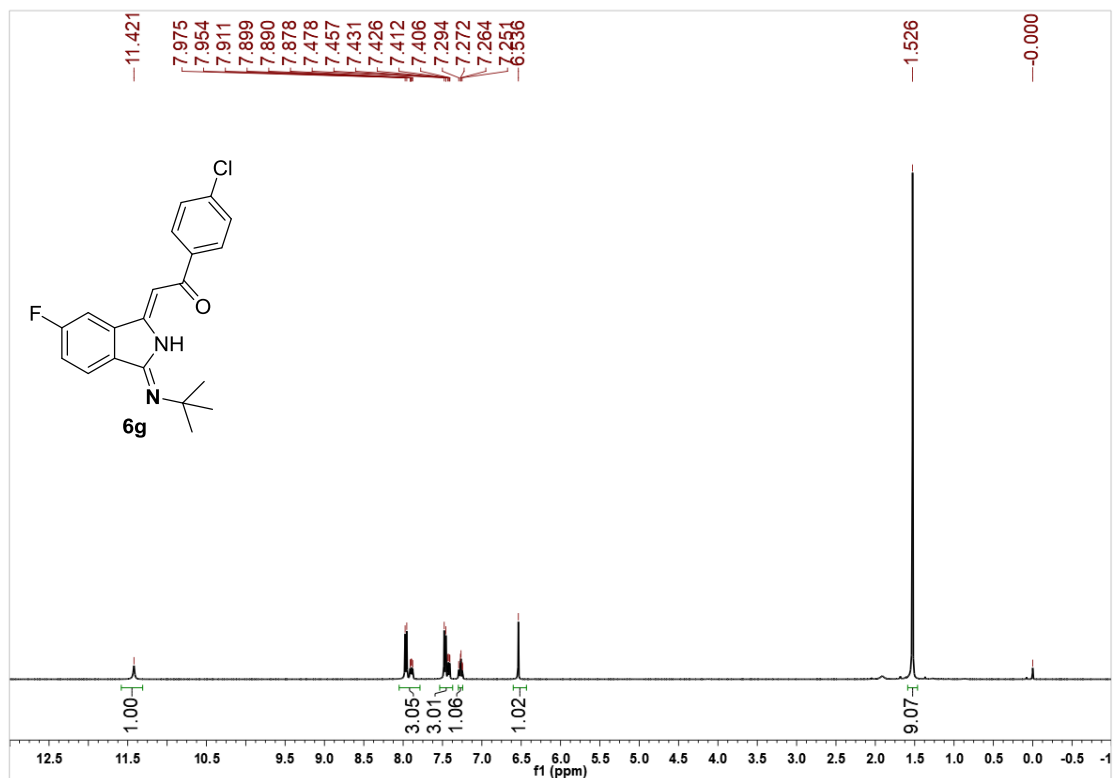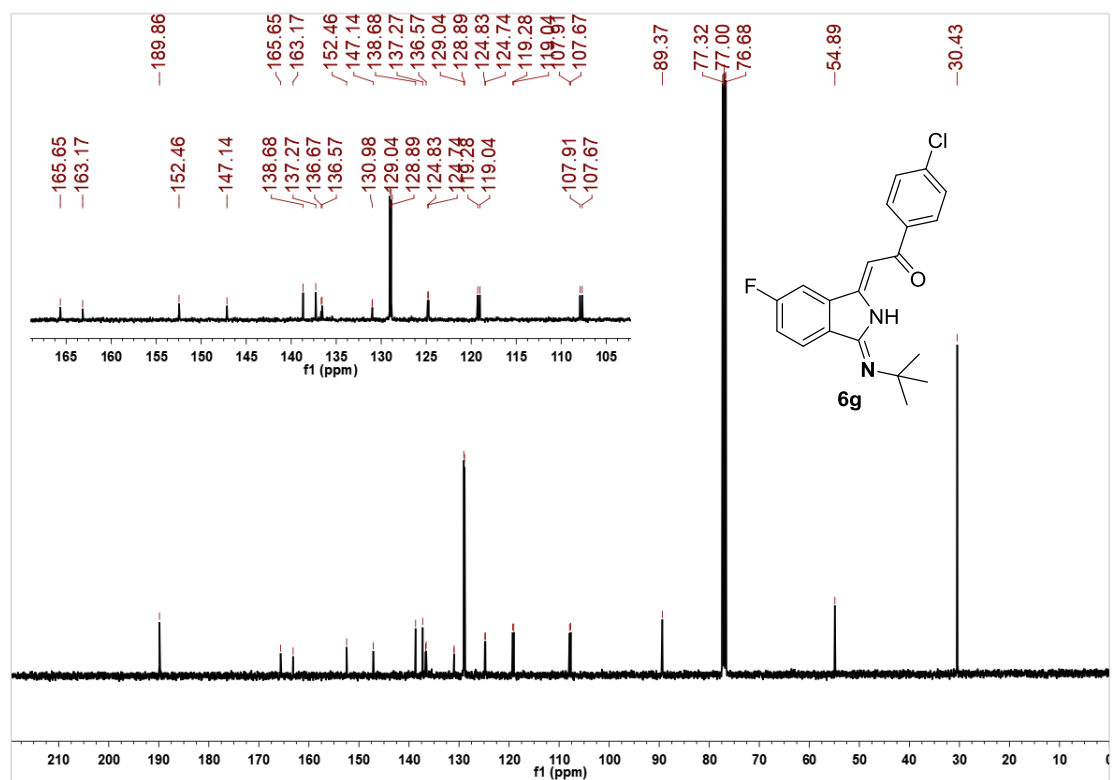

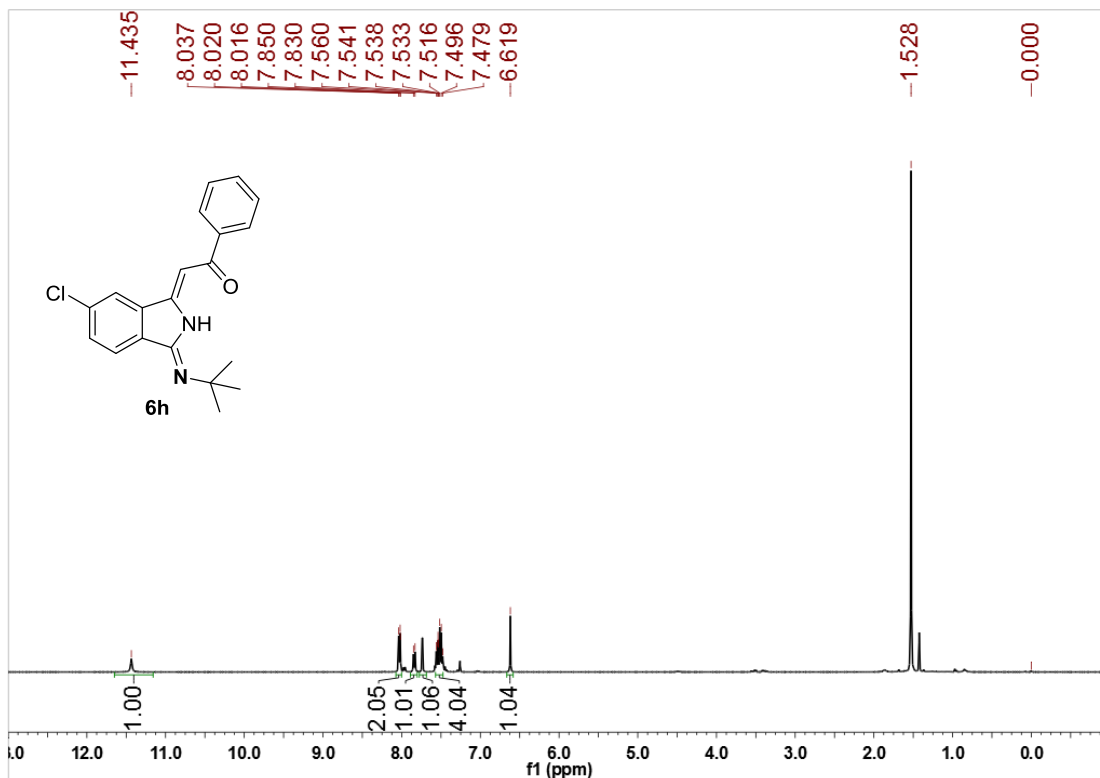

<sup>1</sup>H NMR (400 MHz), CDCl<sub>3</sub>

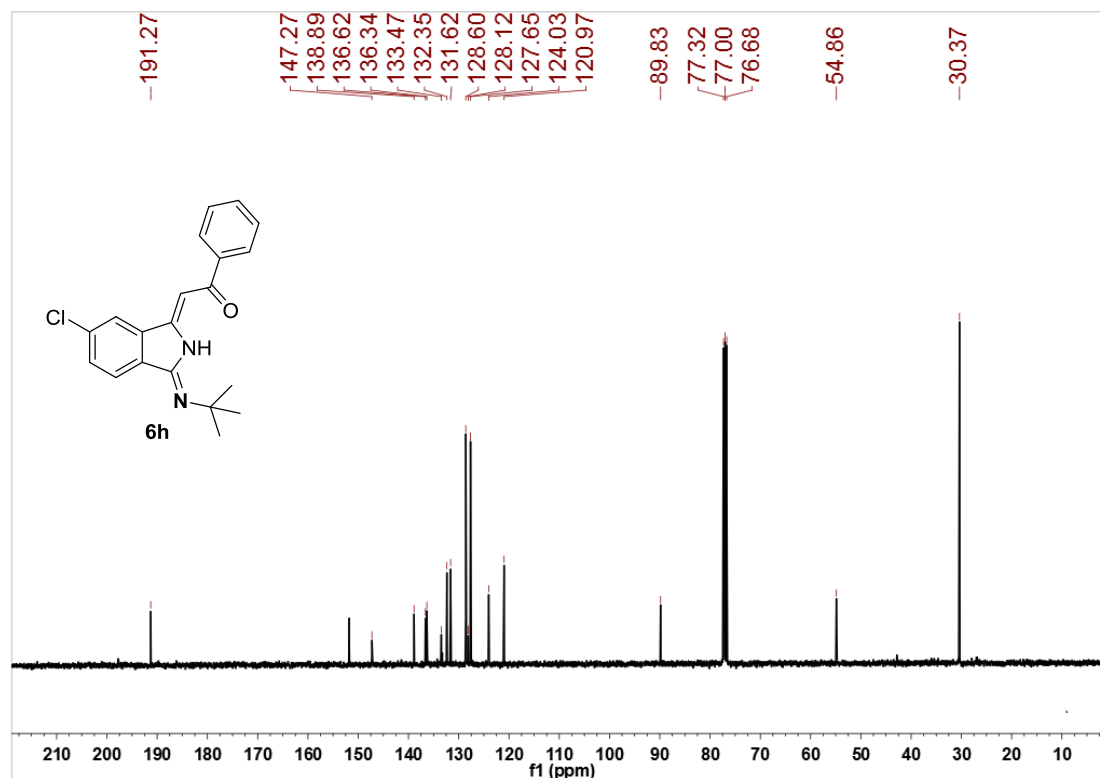

<sup>13</sup>C NMR (100 MHz), CDCl<sub>3</sub>



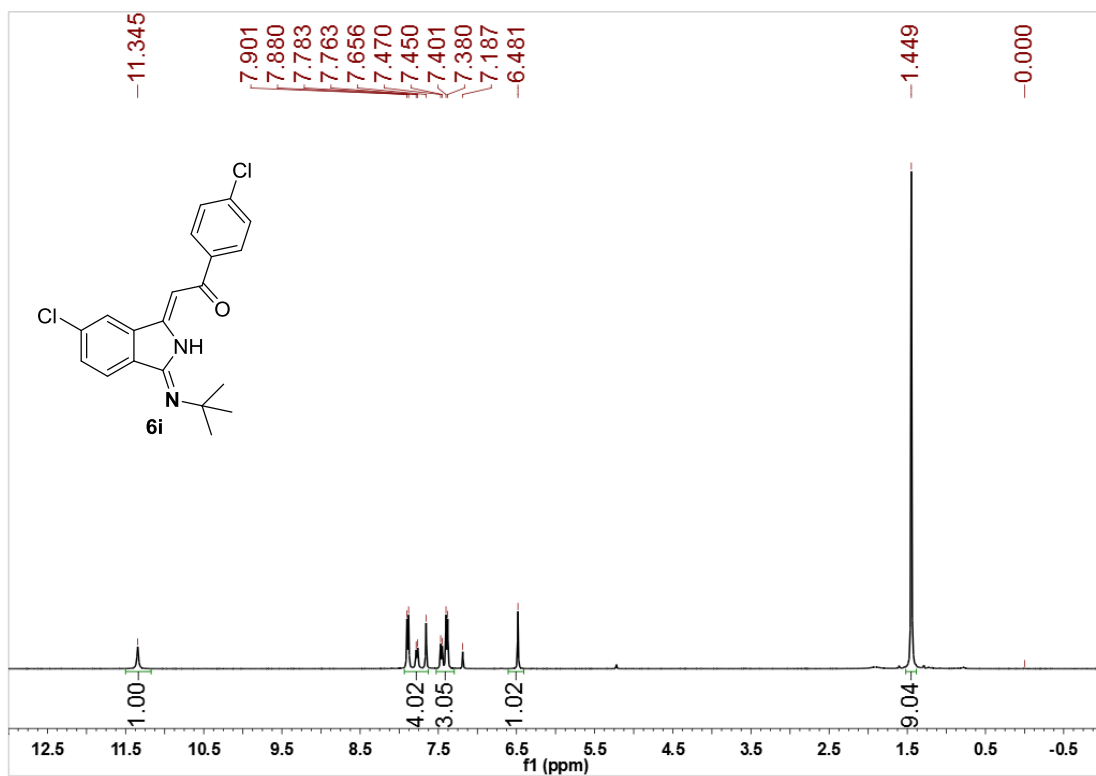

$^1\text{H}$  NMR (400 MHz),  $\text{CDCl}_3$

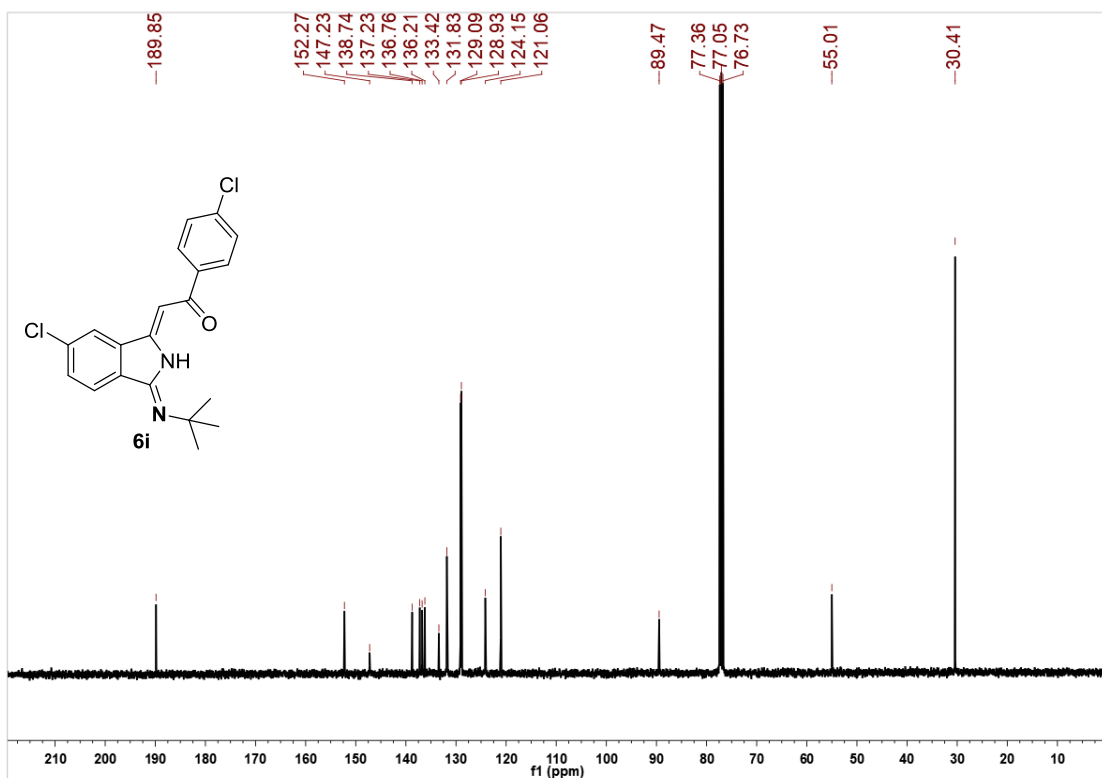

$^{13}\text{C}$  NMR (100 MHz),  $\text{CDCl}_3$

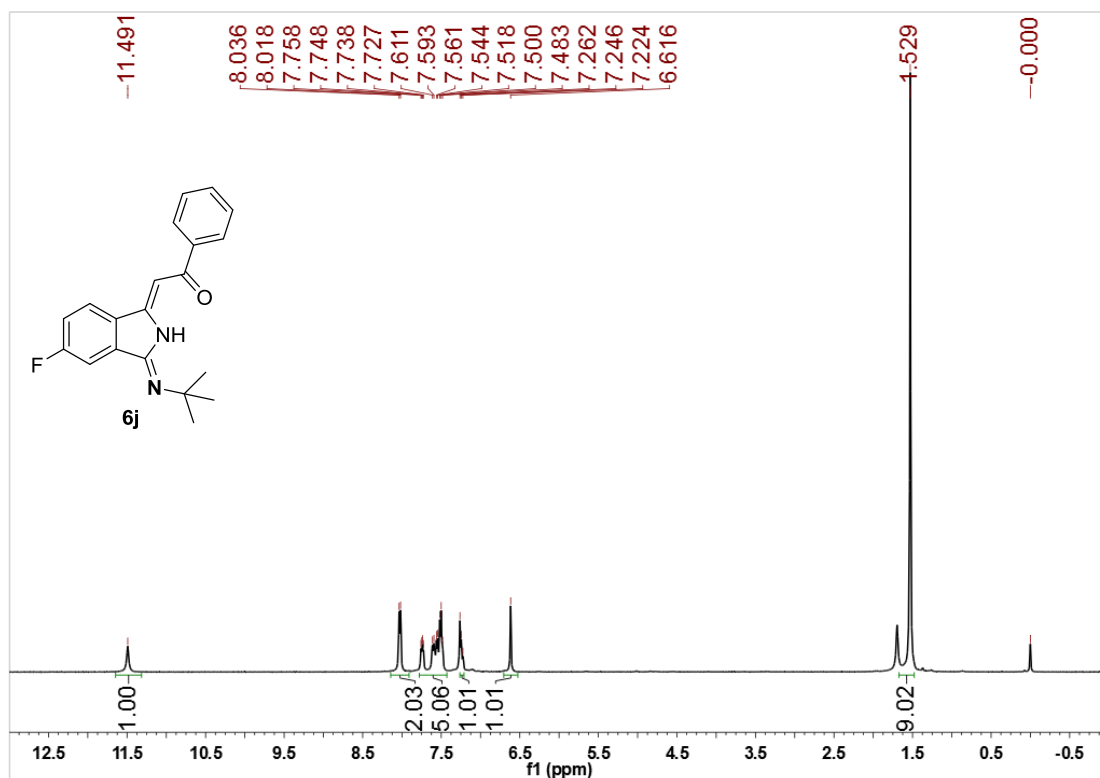

<sup>1</sup>H NMR (400 MHz), CDCl<sub>3</sub>

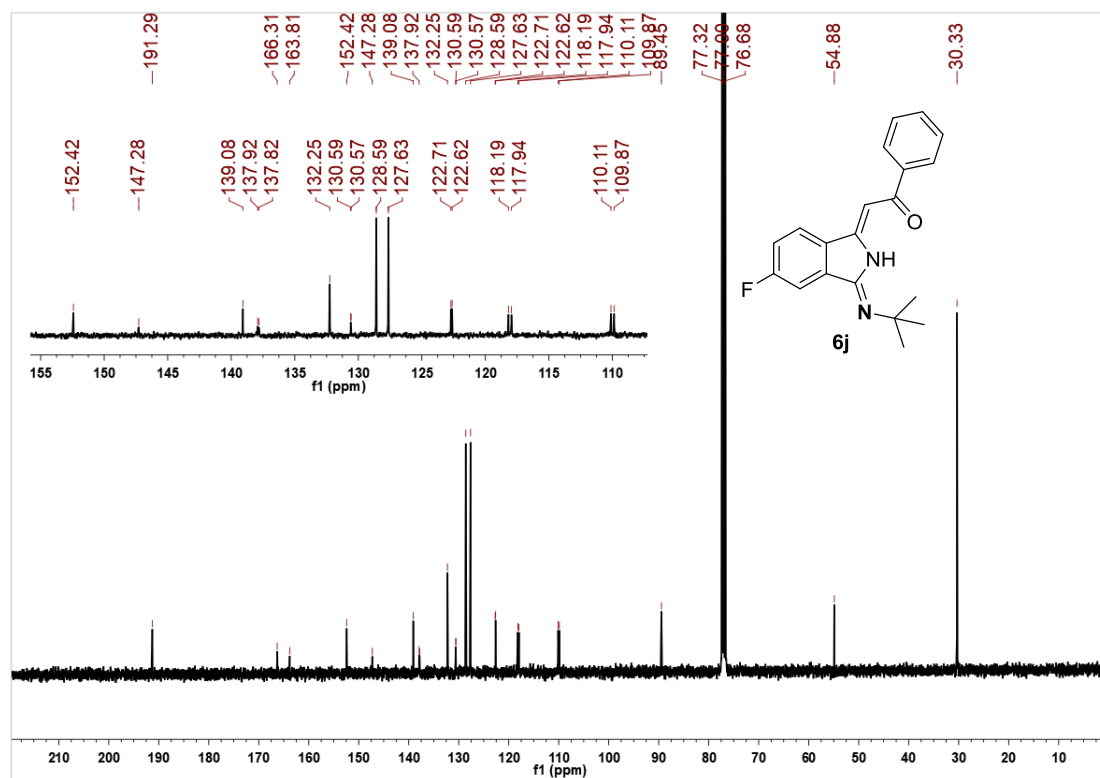

<sup>13</sup>C NMR (100 MHz), CDCl<sub>3</sub>

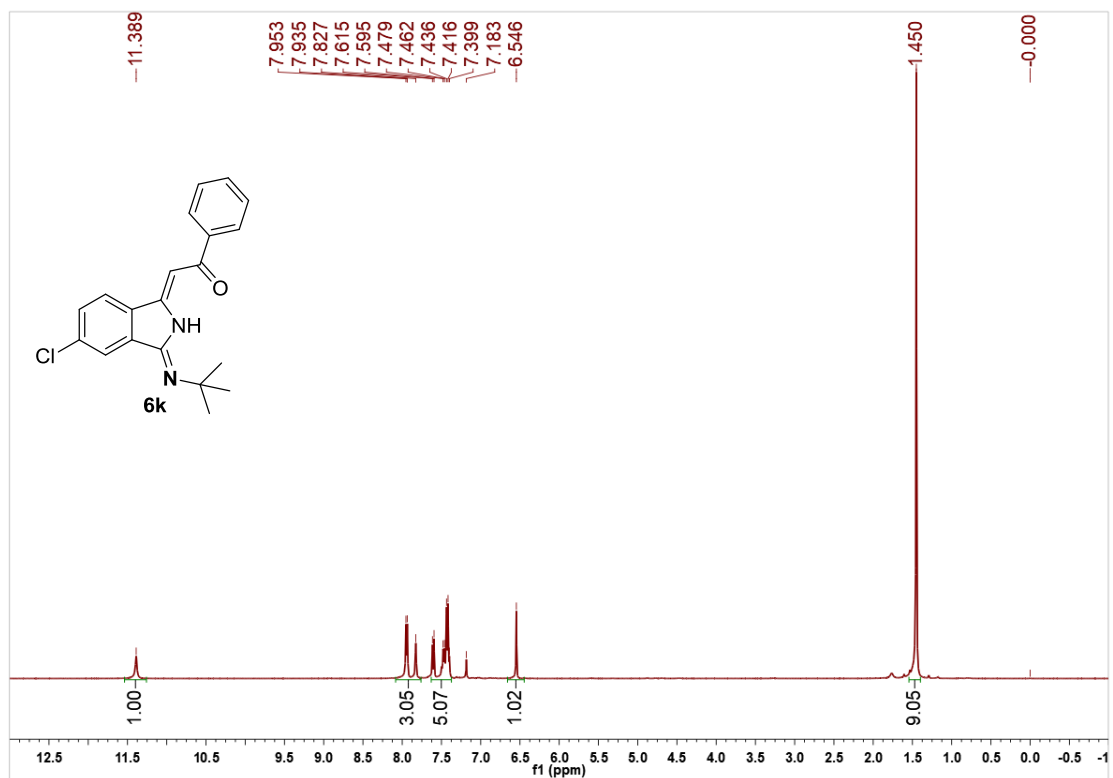

$^1\text{H}$  NMR (400 MHz),  $\text{CDCl}_3$

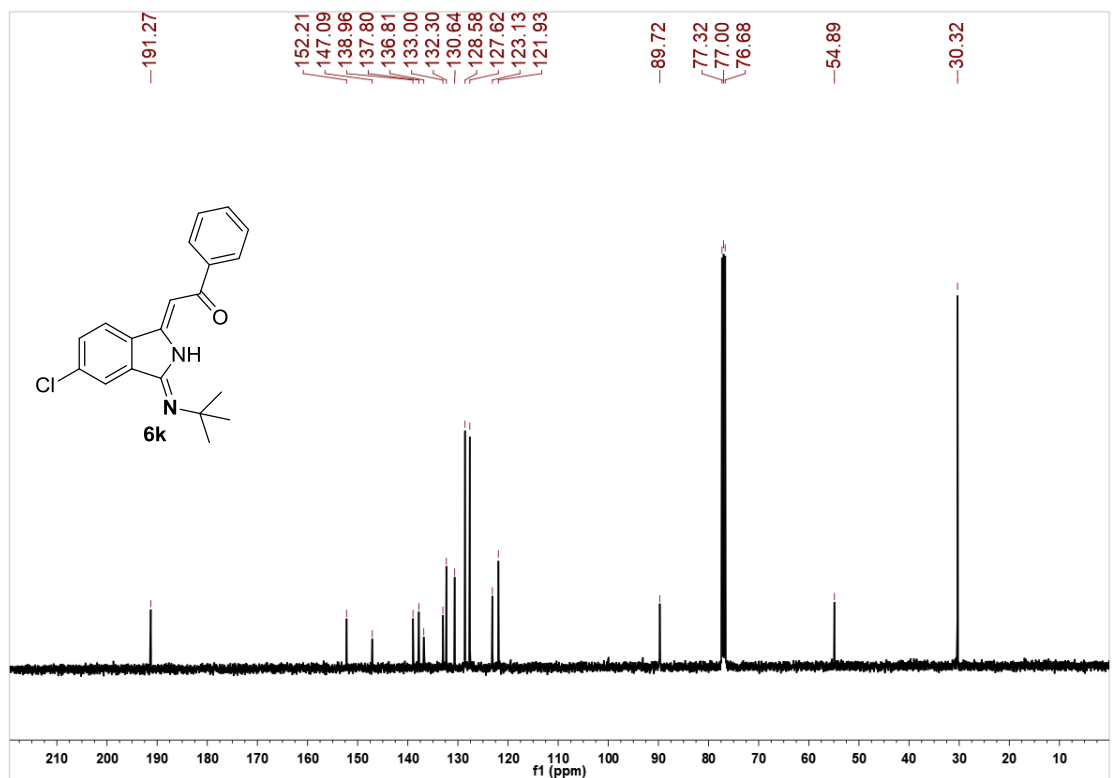

$^{13}\text{C}$  NMR (100 MHz),  $\text{CDCl}_3$

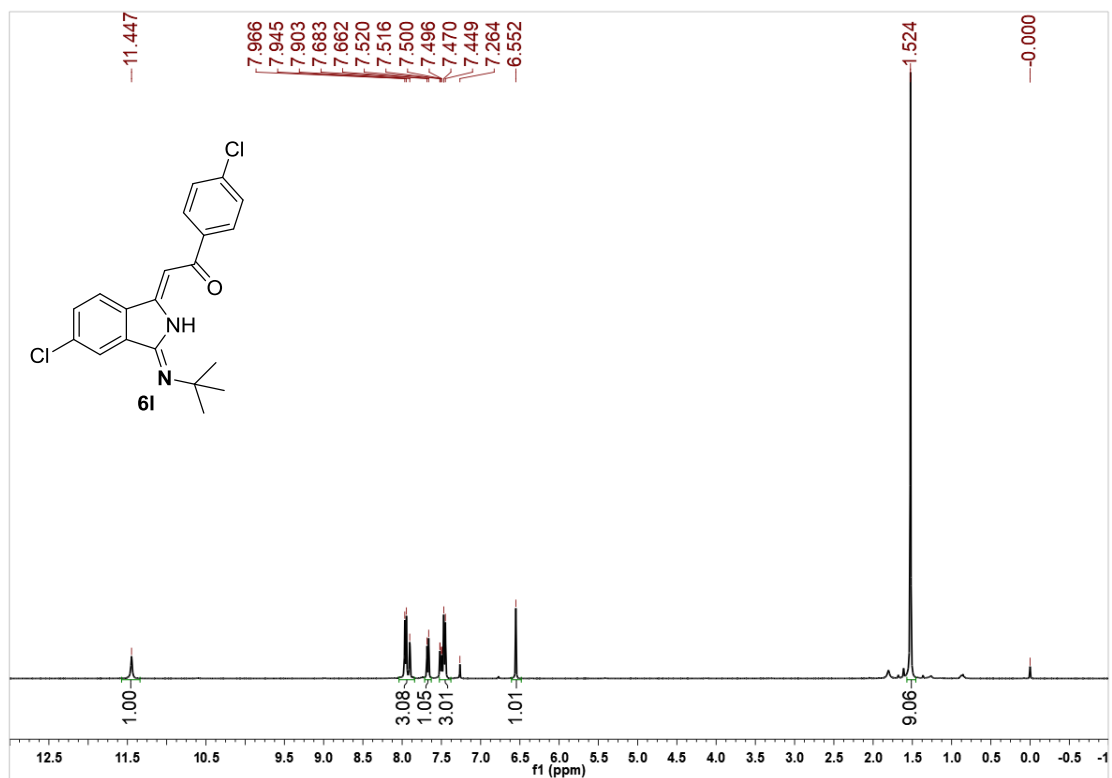

<sup>1</sup>H NMR (400 MHz), CDCl<sub>3</sub>

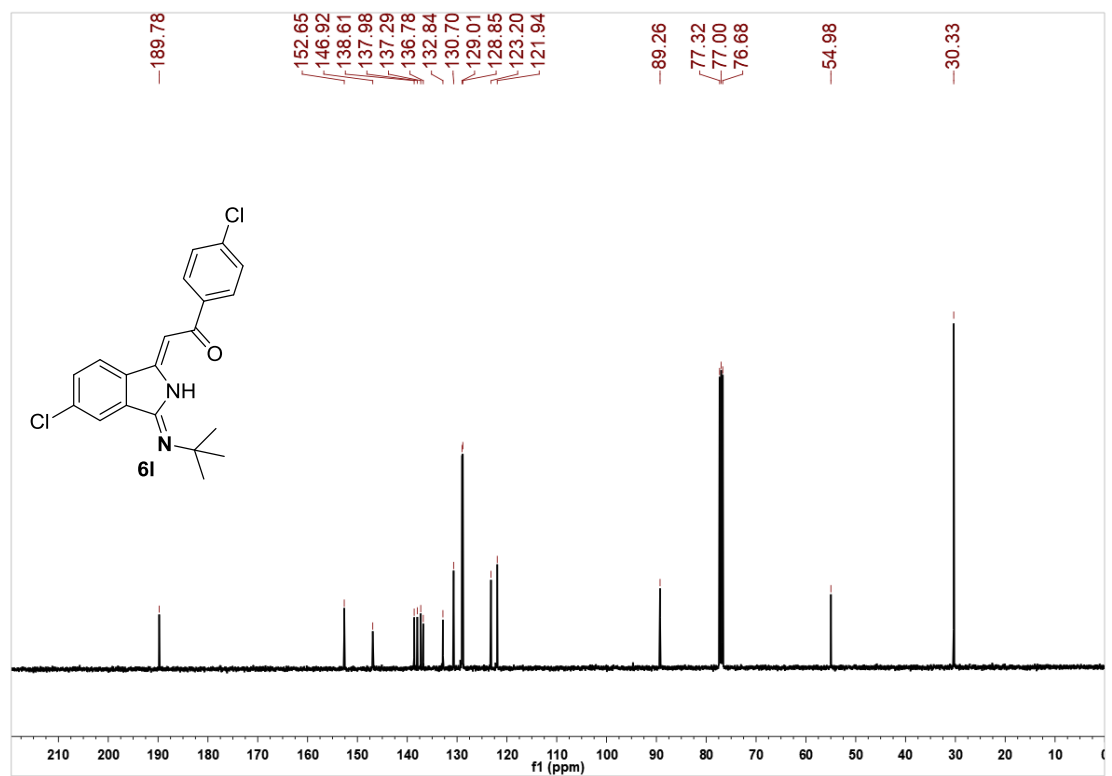

<sup>13</sup>C NMR (100 MHz), CDCl<sub>3</sub>

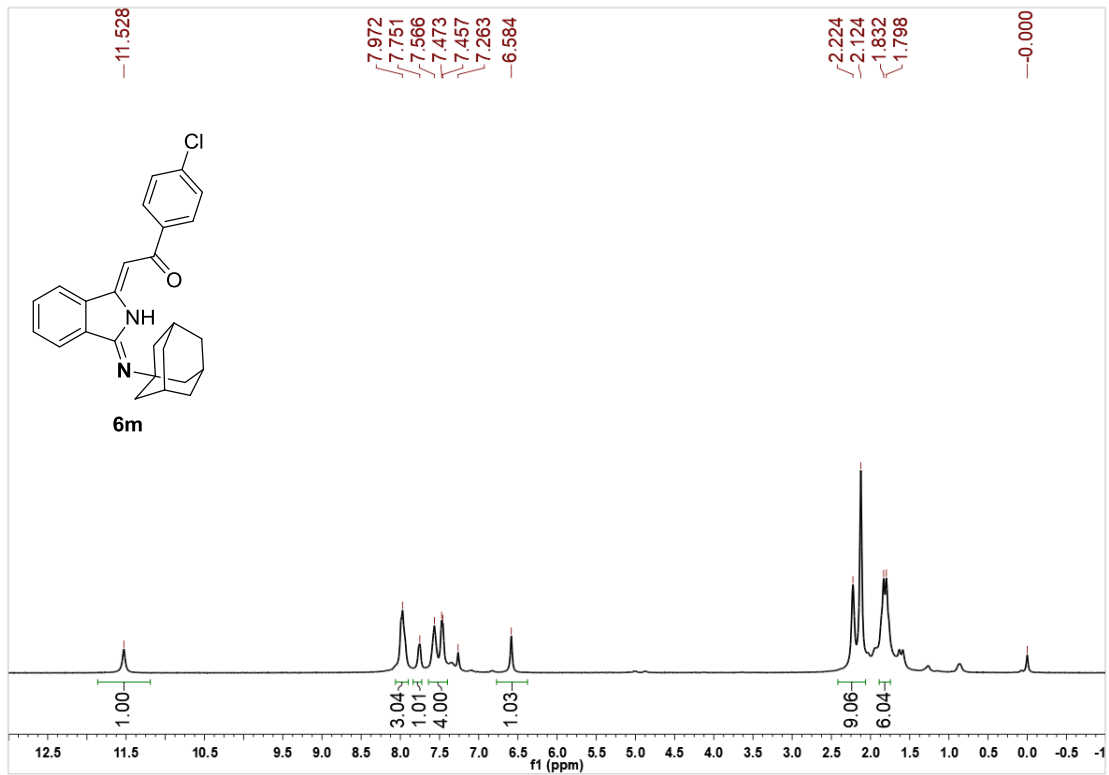

<sup>1</sup>H NMR (400 MHz), CDCl<sub>3</sub>

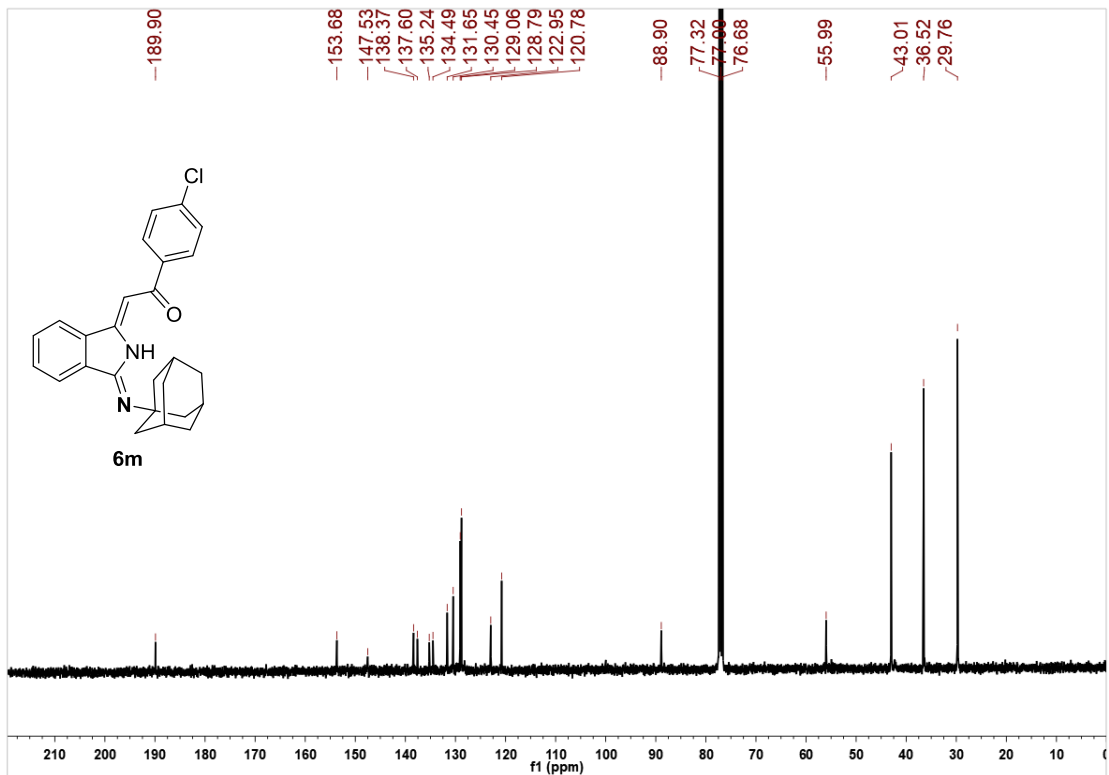

<sup>13</sup>C NMR (100 MHz), CDCl<sub>3</sub>

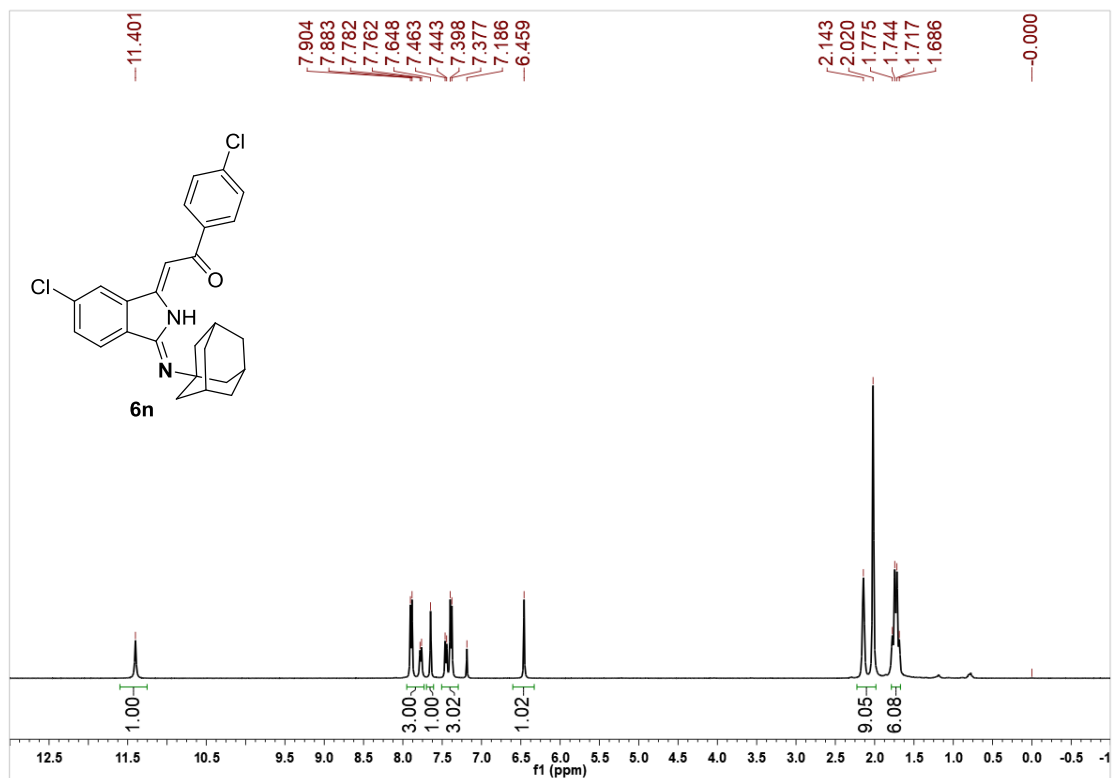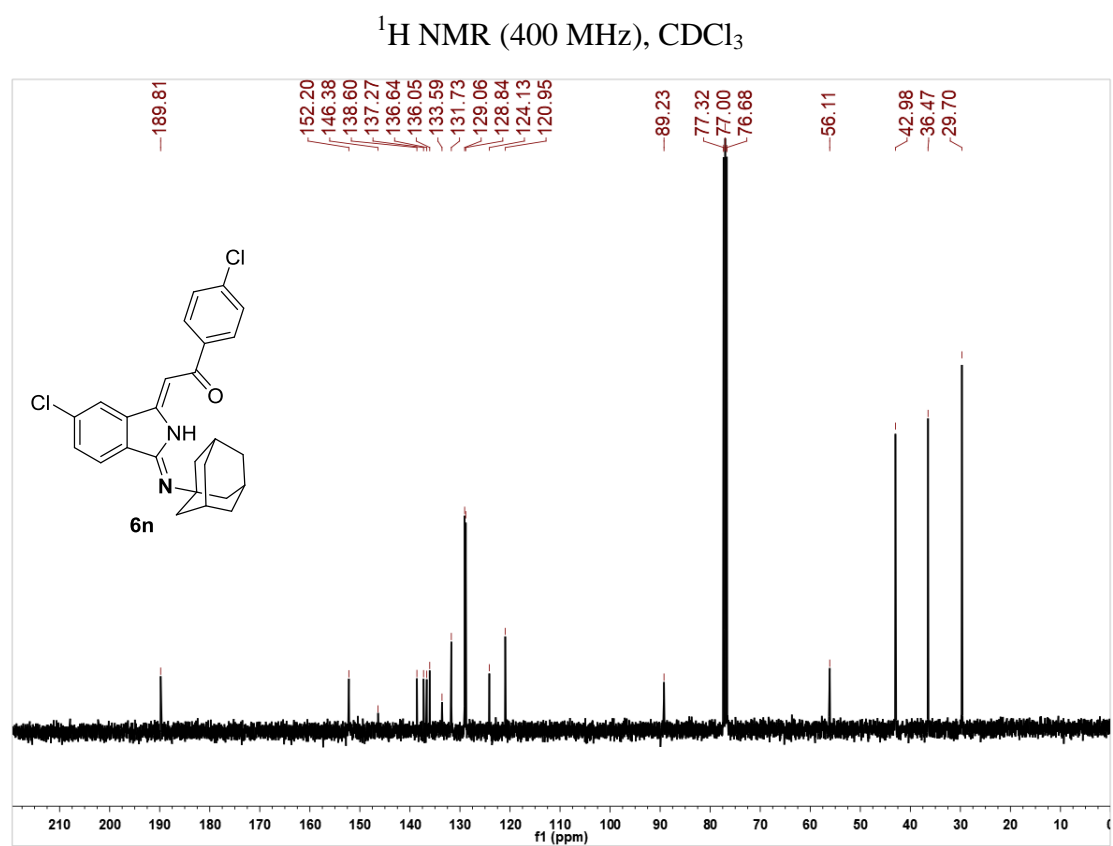

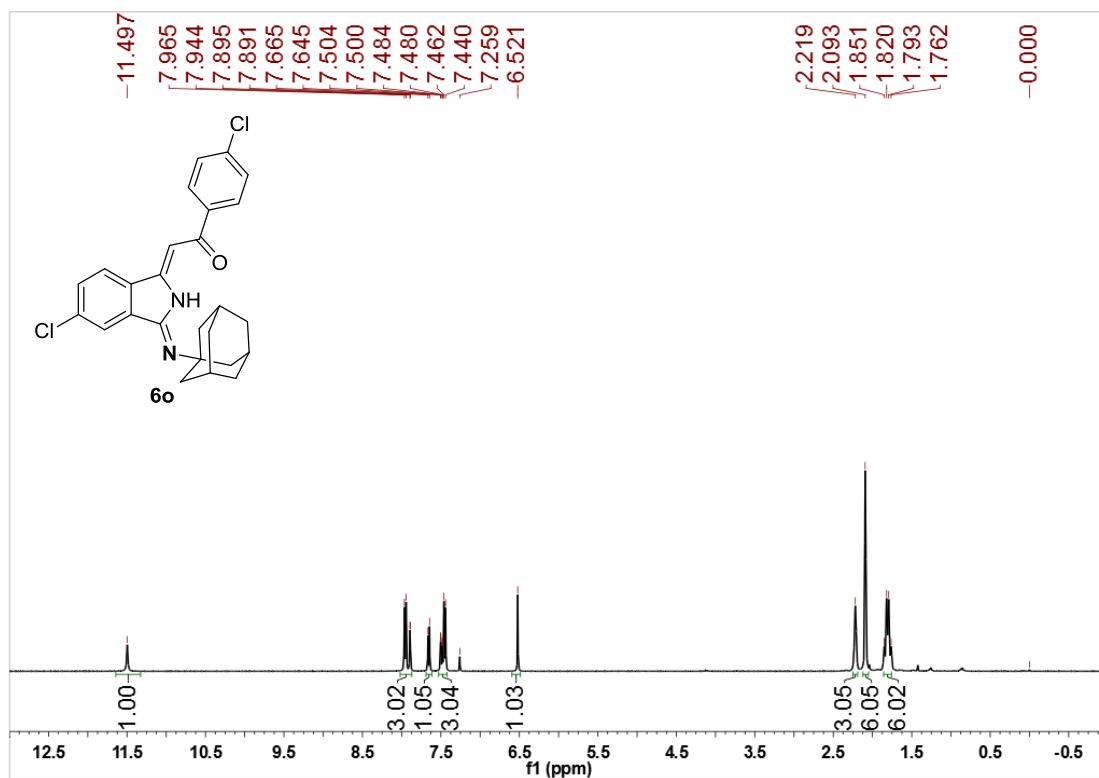

$^1\text{H NMR}$  (400 MHz),  $\text{CDCl}_3$

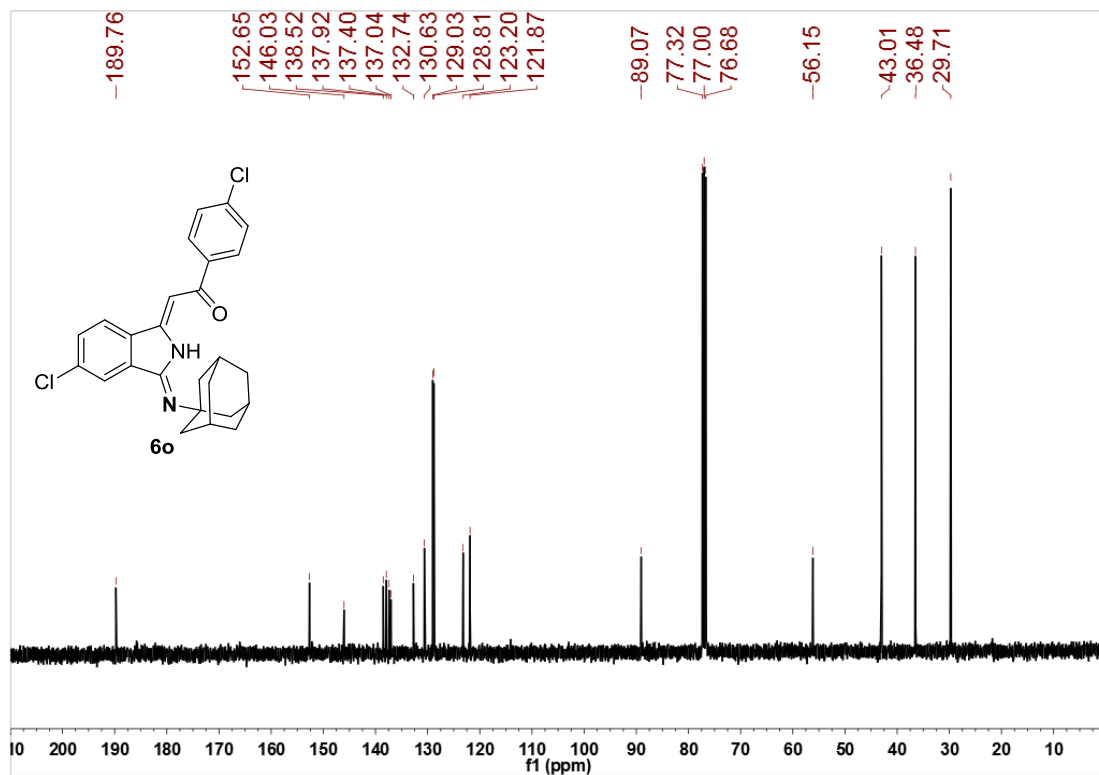

$^{13}\text{C NMR}$  (100 MHz),  $\text{CDCl}_3$

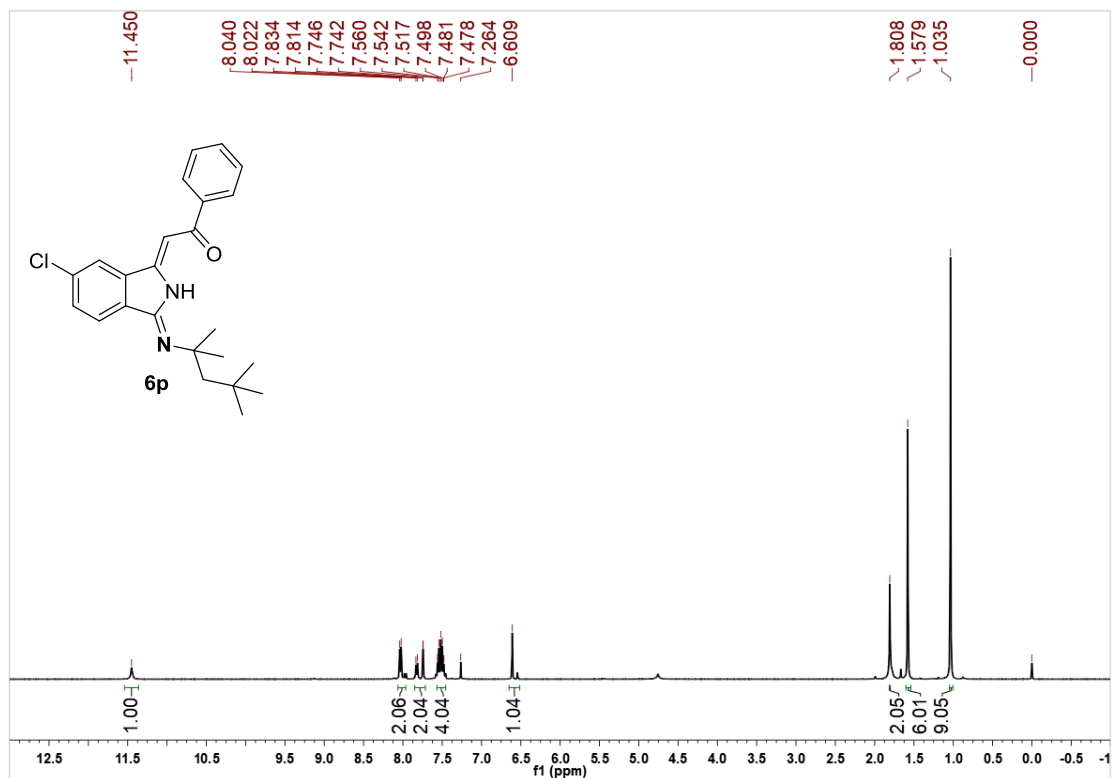

<sup>1</sup>H NMR (400 MHz), CDCl<sub>3</sub>

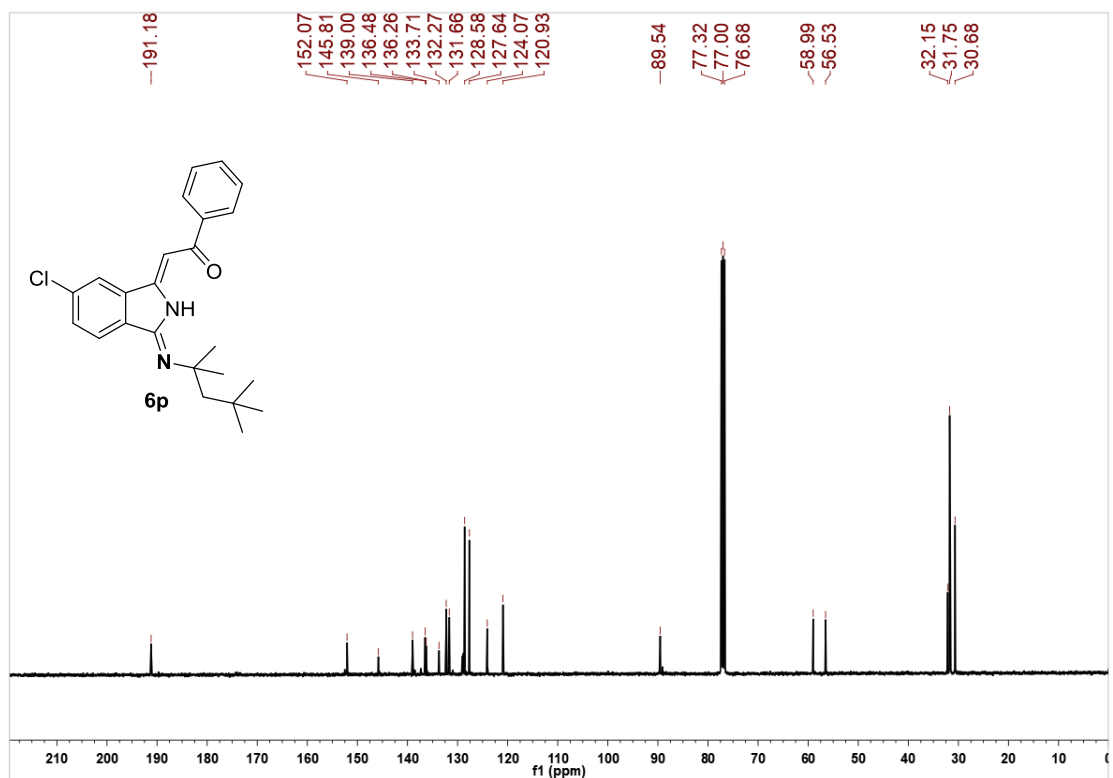

<sup>13</sup>C NMR (100 MHz), CDCl<sub>3</sub>



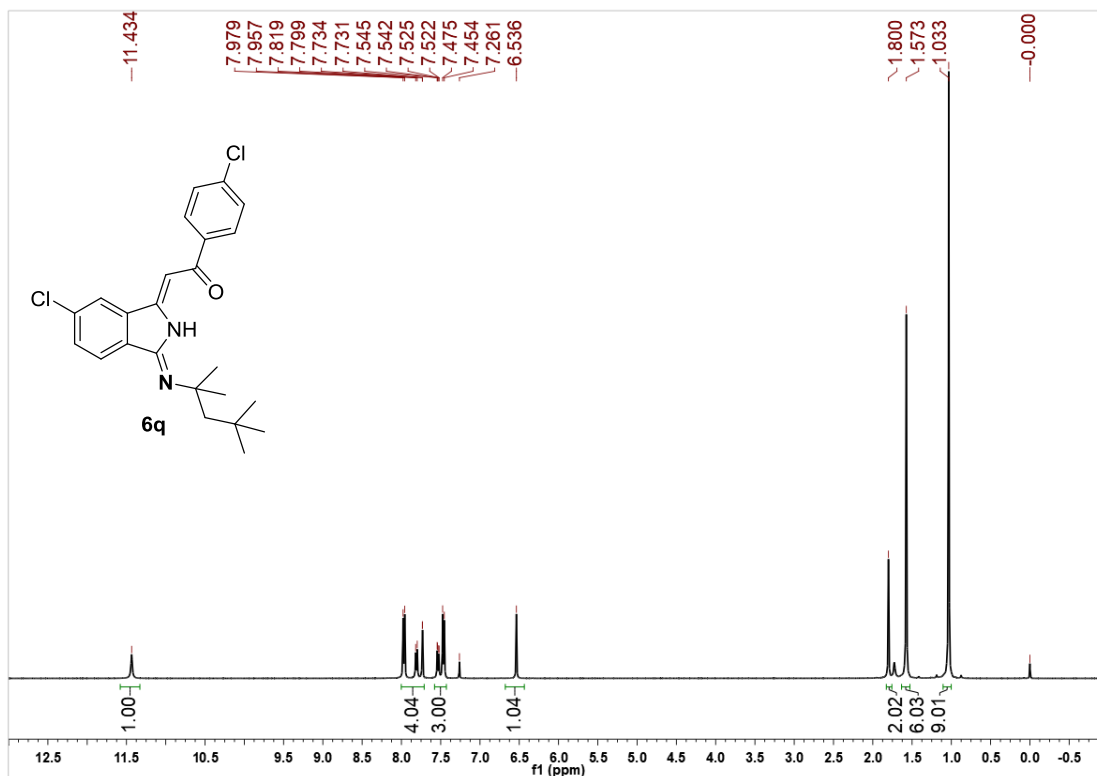

<sup>1</sup>H NMR (400 MHz), CDCl<sub>3</sub>

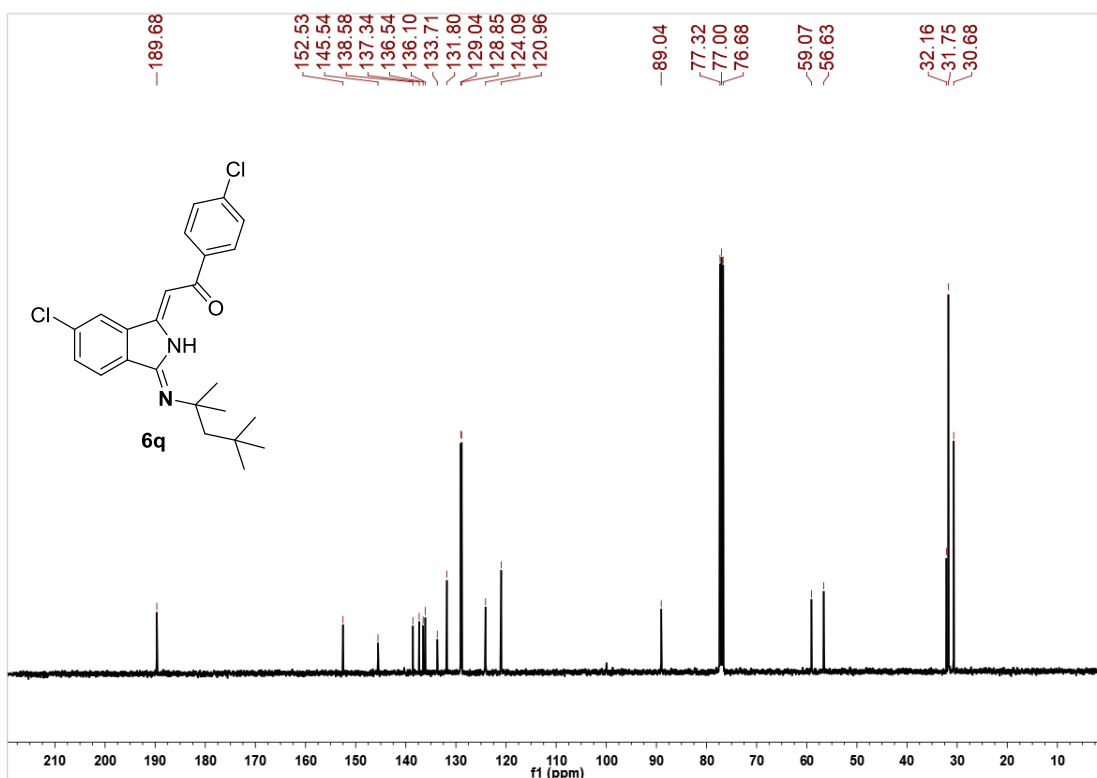

<sup>13</sup>C NMR (100 MHz), CDCl<sub>3</sub>

## 6. Copies of 2D $^1\text{H}$ NMR Spectrum of 4b

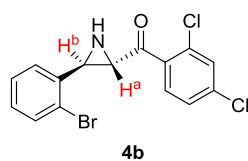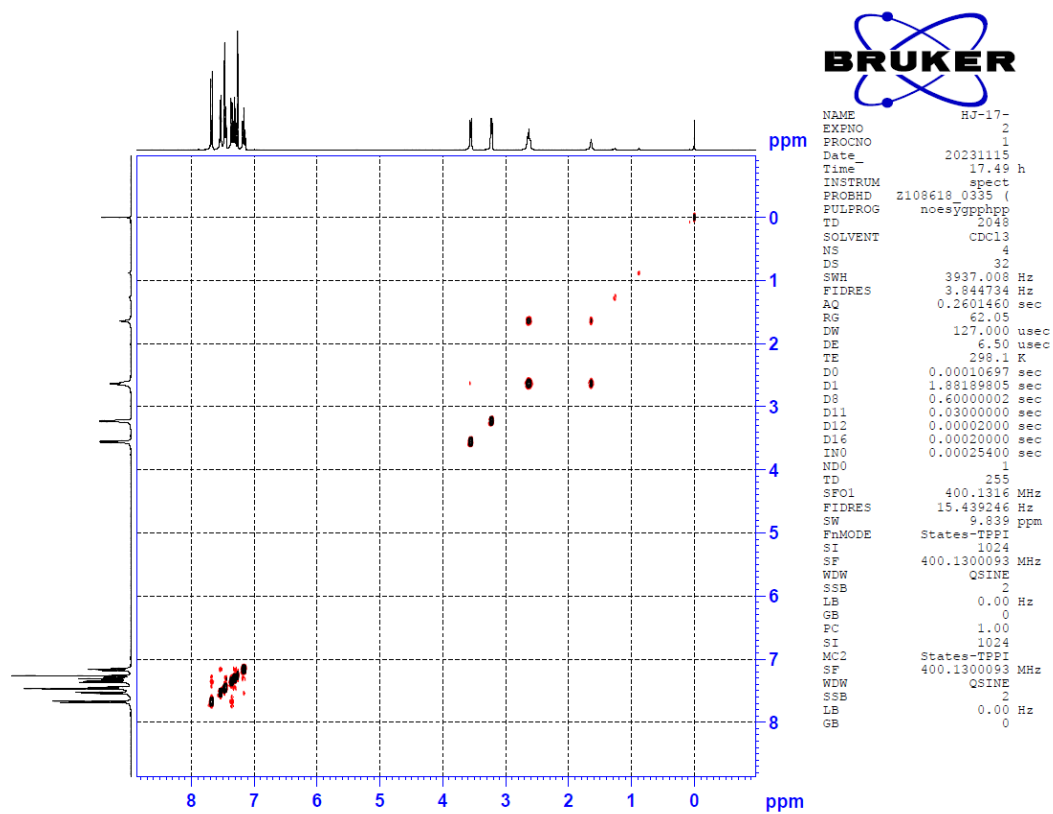

**Figure S2.** Copies of 2D  $^1\text{H}$  NMR Spectrum of **4b**.
